# Supplementary material for: Solvent-Free Iron(III) Chloride-Catalyzed Direct Amidation of Esters
Source: Molecules. 2020 Feb 26;25(5):1040. doi: 10.3390/molecules25051040 (PMC7179140; doi:10.3390/molecules25051040)

## Supporting Information

### Solvent-free iron(III) chloride catalyzed direct amidation of esters

Blessing D Mkhonazi <sup>1</sup>, Malibongwe Shandu<sup>1</sup>, Ronewa Tshinavhe<sup>1</sup>, Sandile B Simelane <sup>2</sup> and Paseka T Moshapo<sup>1,\*</sup>

<sup>1</sup> Research Centre in Synthesis and Catalysis, Department of Chemical Science, University of Johannesburg, PO Box 524, Auckland Park, 2006, South Africa; [201585722@student.uj.ac.za](mailto:201585722@student.uj.ac.za) (B.D.M); [201305188@student.uj.ac.za](mailto:201305188@student.uj.ac.za) (M.S); [201424658@student.uj.ac.za](mailto:201424658@student.uj.ac.za) (R.T).

<sup>2</sup> Department of Chemistry, University of Eswatini, Private Bag 4, Kwaluseni, M201,, Eswatini; [bssimelane@uniswa.sz](mailto:bssimelane@uniswa.sz)

\*Correspondence: [pasekam@uj.ac.za](mailto:pasekam@uj.ac.za); Tel.: +27-11-559-2372 (P.T.M)

#### Table of Contents

|                                                                                              |    |
|----------------------------------------------------------------------------------------------|----|
| 1. Materials and Methods                                                                     | S2 |
| 2. Optimization of reaction conditions                                                       | S2 |
| 3. Typical experimental procedure for FeCl <sub>3</sub> catalyzed direct amidation of esters | S4 |
| 4. NMR Spectra of Products                                                                   | S5 |

## 1. Materials and Methods

All the solvents used were freshly distilled and dried by appropriate techniques. All reagents were purchased from Sigma Aldrich.  $\text{FeCl}_3$  reagent grade 97% was used as the catalyst. All reactions were monitored by thin layer chromatography (TLC) on aluminum-backed Merck silica gel 60 F254 plates using an ascending technique. The plates were visualized under UV light at 254 nm. Gravity column chromatography was done on Merck silica gel 60 (70–230 mesh). All proton nuclear magnetic resonance ( $^1\text{H}$  NMR) spectra were recorded using deuterated chloroform solutions on a Bruker Ultrashield (400 or 500 MHz) spectrometer. Carbon-13 nuclear magnetic resonance ( $^{13}\text{C}$  NMR) spectra were recorded on the same instruments at 100 MHz. All chemical shifts are reported in ppm. The chemical structures of the synthesized compounds were confirmed by comparison of their NMR data to literature reported data.

## 2. Optimization of reaction conditions

### 2.1 Catalyst Screening

Catalyst screening, reaction temperature as well as catalyst loading were optimized using ester **1a** and amine **2a** as model substrates. Reactions were carried out as reported in the manuscript using 10 mol% of each catalyst under solvent-free conditions. The reactions were left to stir for 24 hours at 50 °C. The formed products were isolated by column chromatographic techniques and the yields reported as shown in table S1. No product was observed upon TLC analysis of the control experiment.

Table S1

| Entry | Catalyst        | Temperature (°C) | Time (h) | Yield |
|-------|-----------------|------------------|----------|-------|
| 1     | $\text{AlCl}_3$ | 50               | 24       | 91%   |
| 2     | $\text{FeBr}_3$ | 50               | 24       | 84%   |
| 3     | $\text{FeCl}_3$ | 50               | 24       | 98%   |
| 4     | $\text{BiCl}_3$ | 50               | 24       | 96%   |
| 5     | $\text{FeCl}_2$ | 50               | 24       | 81%   |
| 6     | None            | 50               | 24       | 0%    |

### 2.2 Reaction Temperature

Amidation of ester **1a** with amine **2a** was conducted at 50 °C, 80 °C and 100 °C as shown in Table S2. The reaction time to reach completion was monitored by TLC. Lowering the reaction temperature resulted in prolonged reaction times and there was no difference between reactions at 80 and 100 °C.

**Table S2**

| Entry | Temperature (°C) | Catalyst Loading (mol%) | Reaction Time (h) |
|-------|------------------|-------------------------|-------------------|
| 1     | 100              | 10                      | 6                 |
| 2     | 80               | 10                      | 6                 |
| 3     | 50               | 10                      | 24                |

### 2.3 Catalyst Loading

Amidation of ester **1a** with amine **2a** was conducted according to the procedure reported in the manuscript using 5 mol%, 10 mol% and 15 mol% FeCl<sub>3</sub>. The reaction progress was monitored by TLC plate and the reaction times are shown in Tables S3. The optimum catalyst loading was 15 mol% as the reaction was complete within 1.5 hours.

**Table S3**

| Entry | Catalyst Loading (mol%) | Temperature (°C) | Reaction Time (h) |
|-------|-------------------------|------------------|-------------------|
| 1     | 5                       | 80               | 24                |
| 2     | 10                      | 80               | 6                 |
| 3     | 15                      | 80               | 1.5               |

### 2.4 Solvent Screening

An oven-dried pressure tube equipped with a magnetic stirrer was evacuated with nitrogen. To this was added of ester **1a** (492  $\mu$ l, 5.04 mmol) followed by amine **2a** (0.5 ml, 4.58 mmol) and a 1 ml of solvent (Toluene, acetonitrile, tetrahydrofuran or 1,2-dichloroethane. Finally, FeCl<sub>3</sub> (111 mg, 0.684 mmol) was added and the reaction mixture was then sealed and stirred at 80 °C. The reaction was left to stir for 90 min and was diluted with EtOAc and washed once with saturated NaHCO<sub>3</sub> and once with distilled H<sub>2</sub>O. The combined aqueous layers were extracted once with ethyl acetate. The combined organic layers were then dried over MgSO<sub>4</sub>, filtered and solvents removed under reduced pressure. The crude product was purified by silica gel flash column chromatography using a combination of hexane and ethyl acetate (3:2). The isolated product yields are reported in Table 1 of the manuscript.

### 3. Typical experimental procedure for FeCl<sub>3</sub> catalyzed direct amidation of esters

An oven-dried pressure tube equipped with a magnetic stirrer was evacuated with nitrogen. To this was added of ester **1a** (492  $\mu$ l, 5.04 mmol) followed by amine **2a** (0.5 ml, 4.58 mmol) and finally FeCl<sub>3</sub> (111 mg, 0.684 mmol). The mixture was then sealed and stirred at 80 °C (0.5 ml of CH<sub>3</sub>CN was added if the reaction mixture solidified). The reaction was monitored by TLC until completion upon which it was diluted with EtOAc and washed once with saturated NaHCO<sub>3</sub> and once with distilled H<sub>2</sub>O. The combined aqueous layers were extracted once with ethyl acetate. The combined organic layers were then dried over MgSO<sub>4</sub>, filtered and solvents removed under reduced pressure. The crude product was purified by silica gel flash column chromatography using a combination of hexane and ethyl acetate (3:2).

#### 4. NMR Spectra of Products

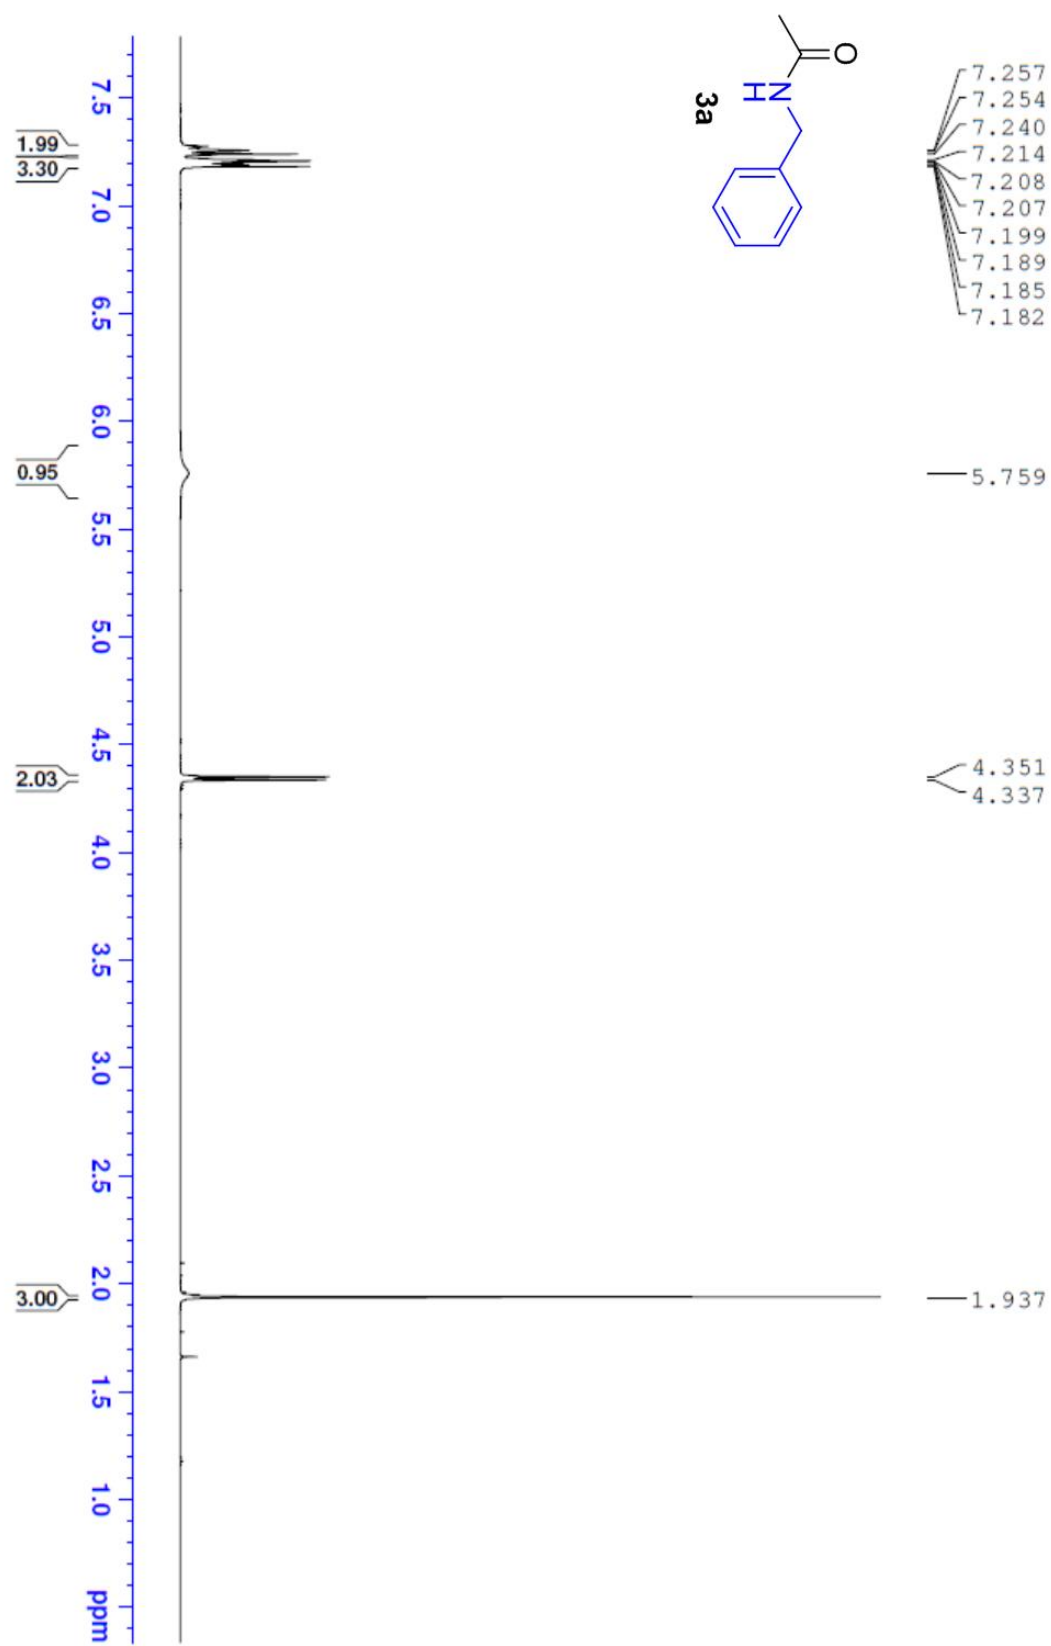

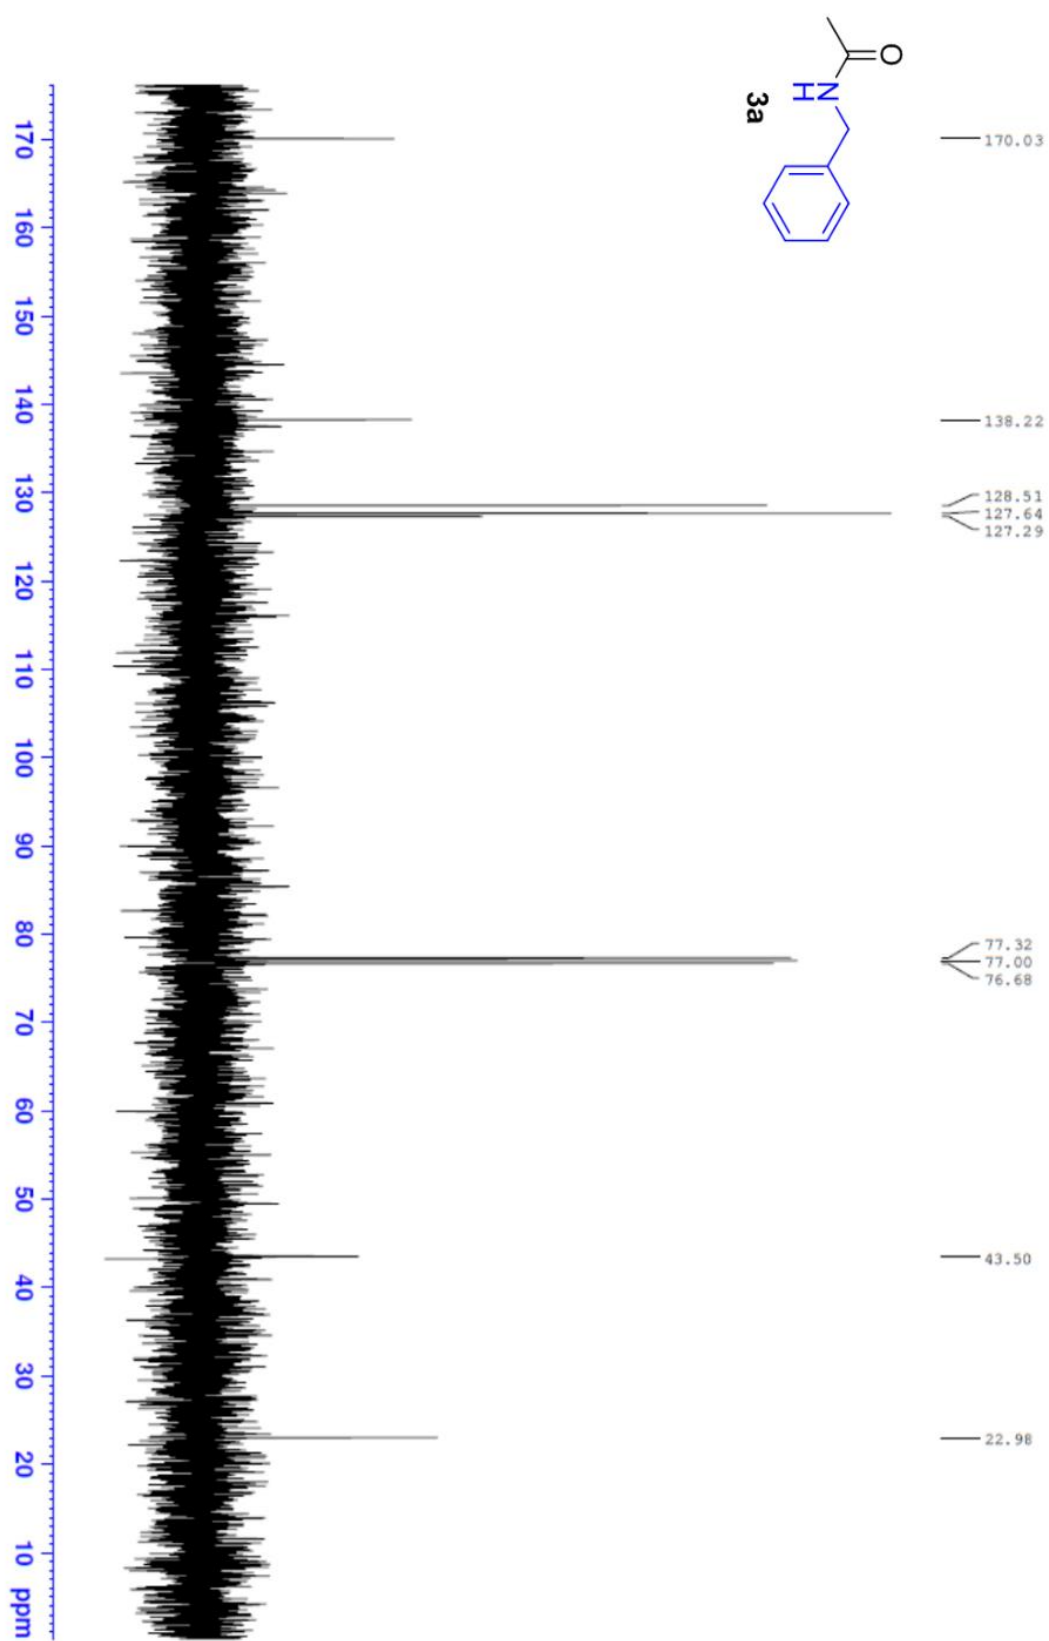

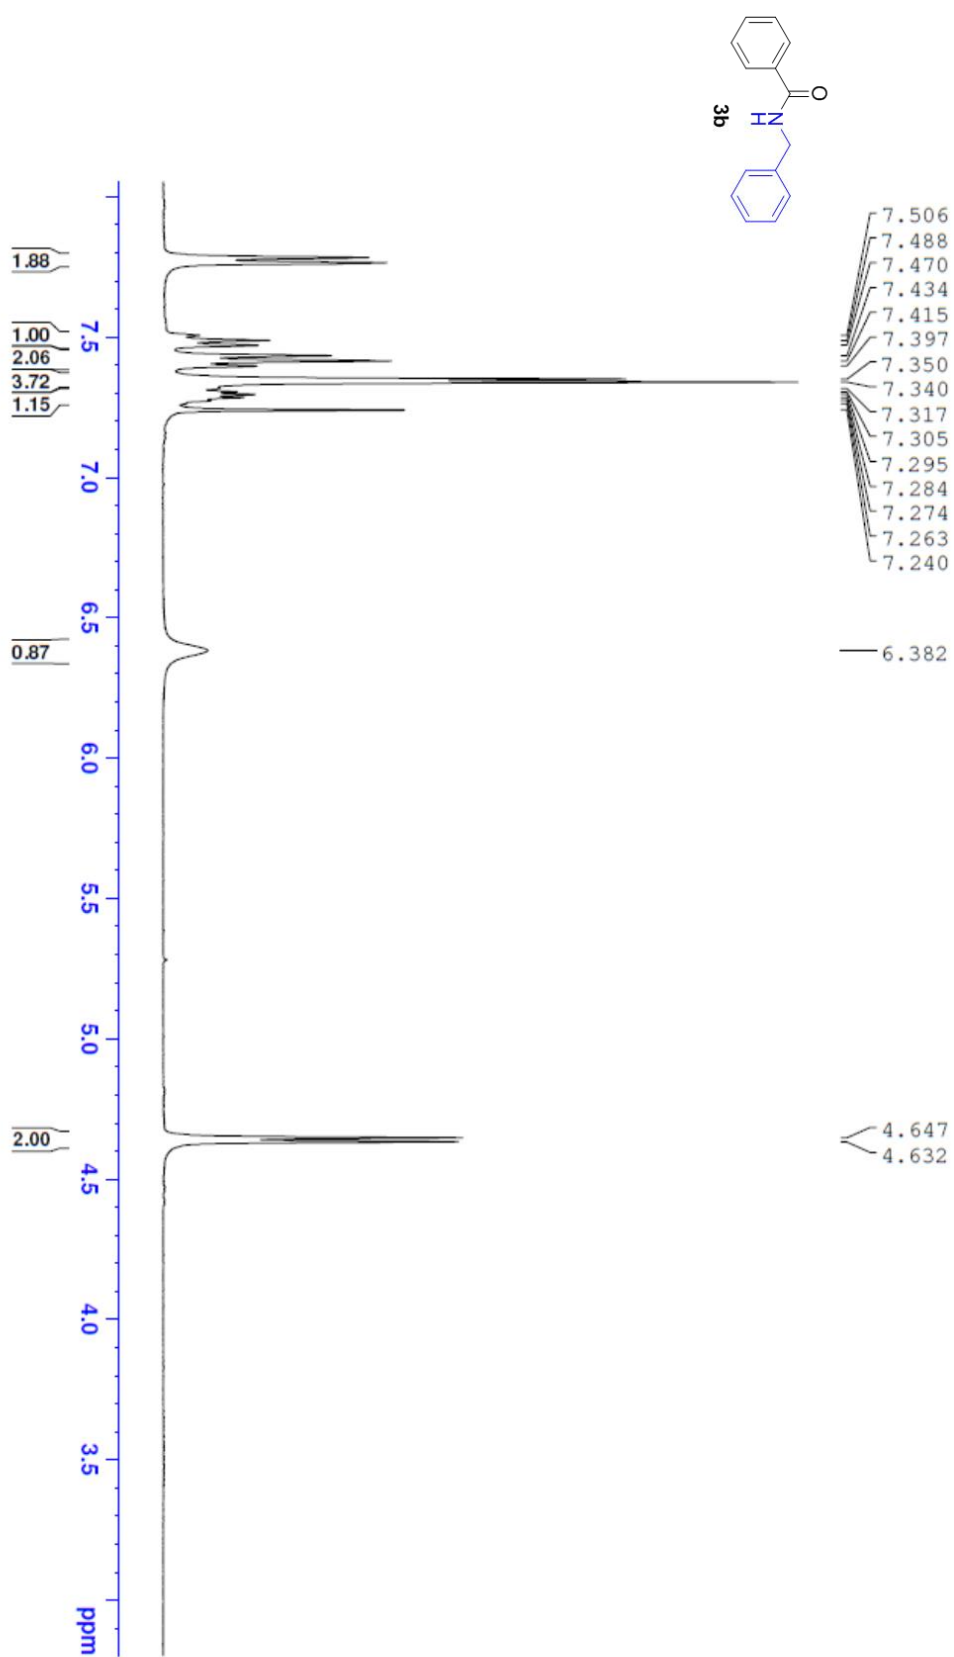

09-JAN-2020 2 C13

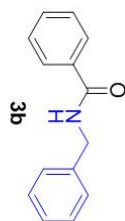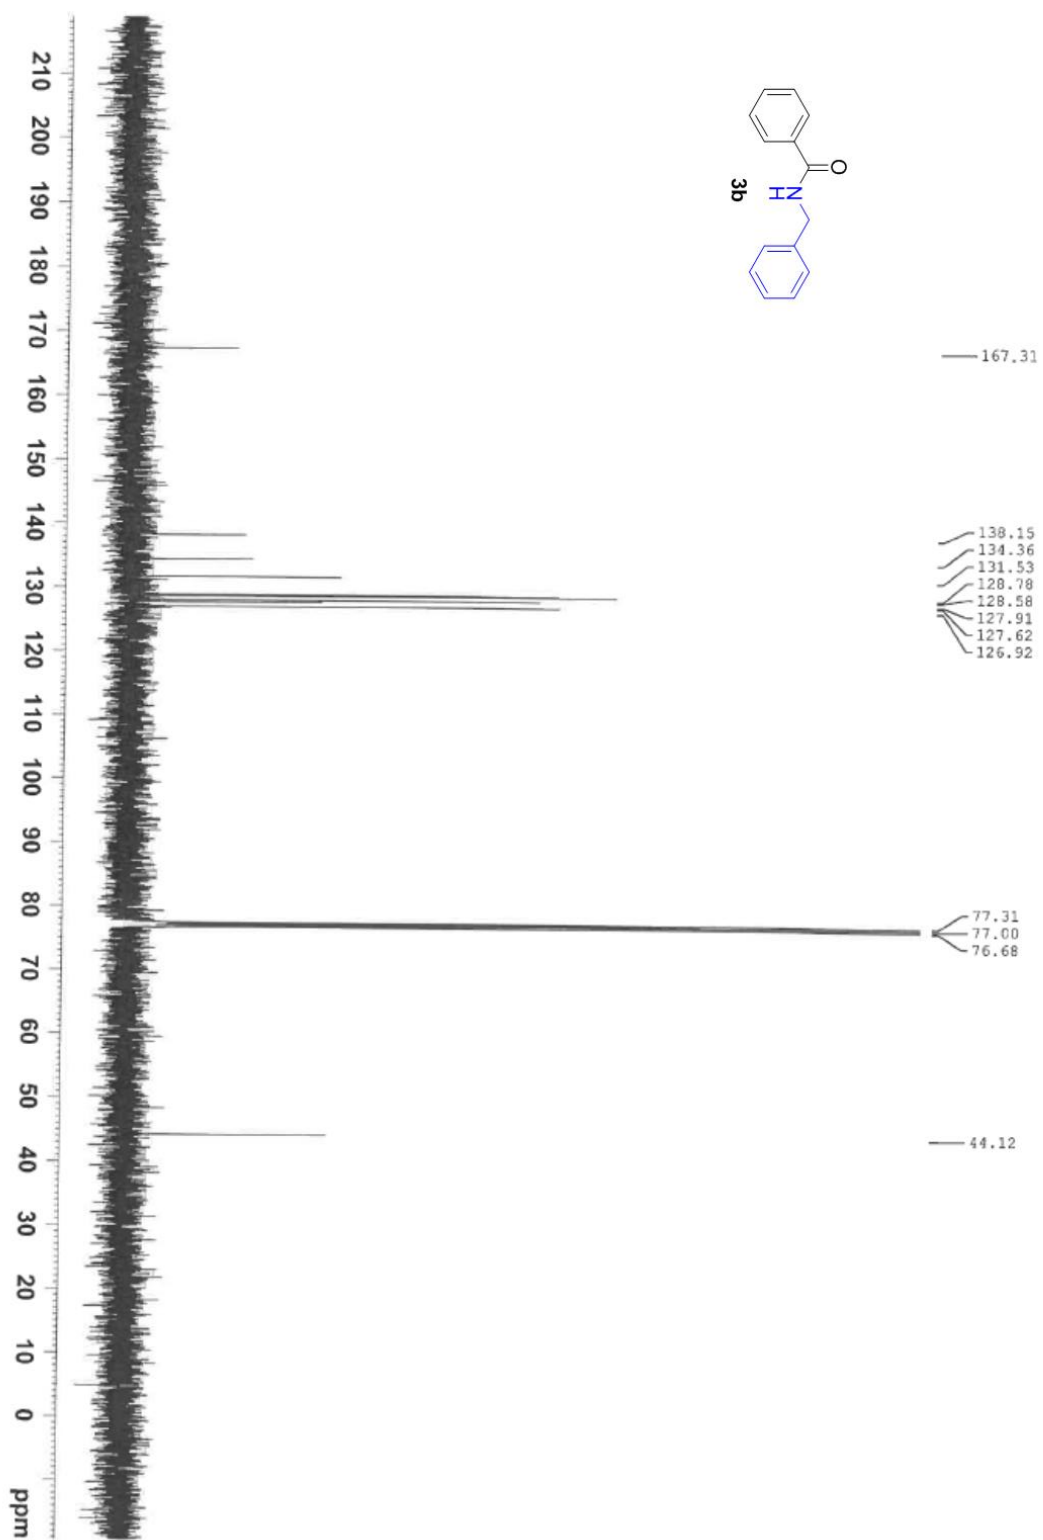

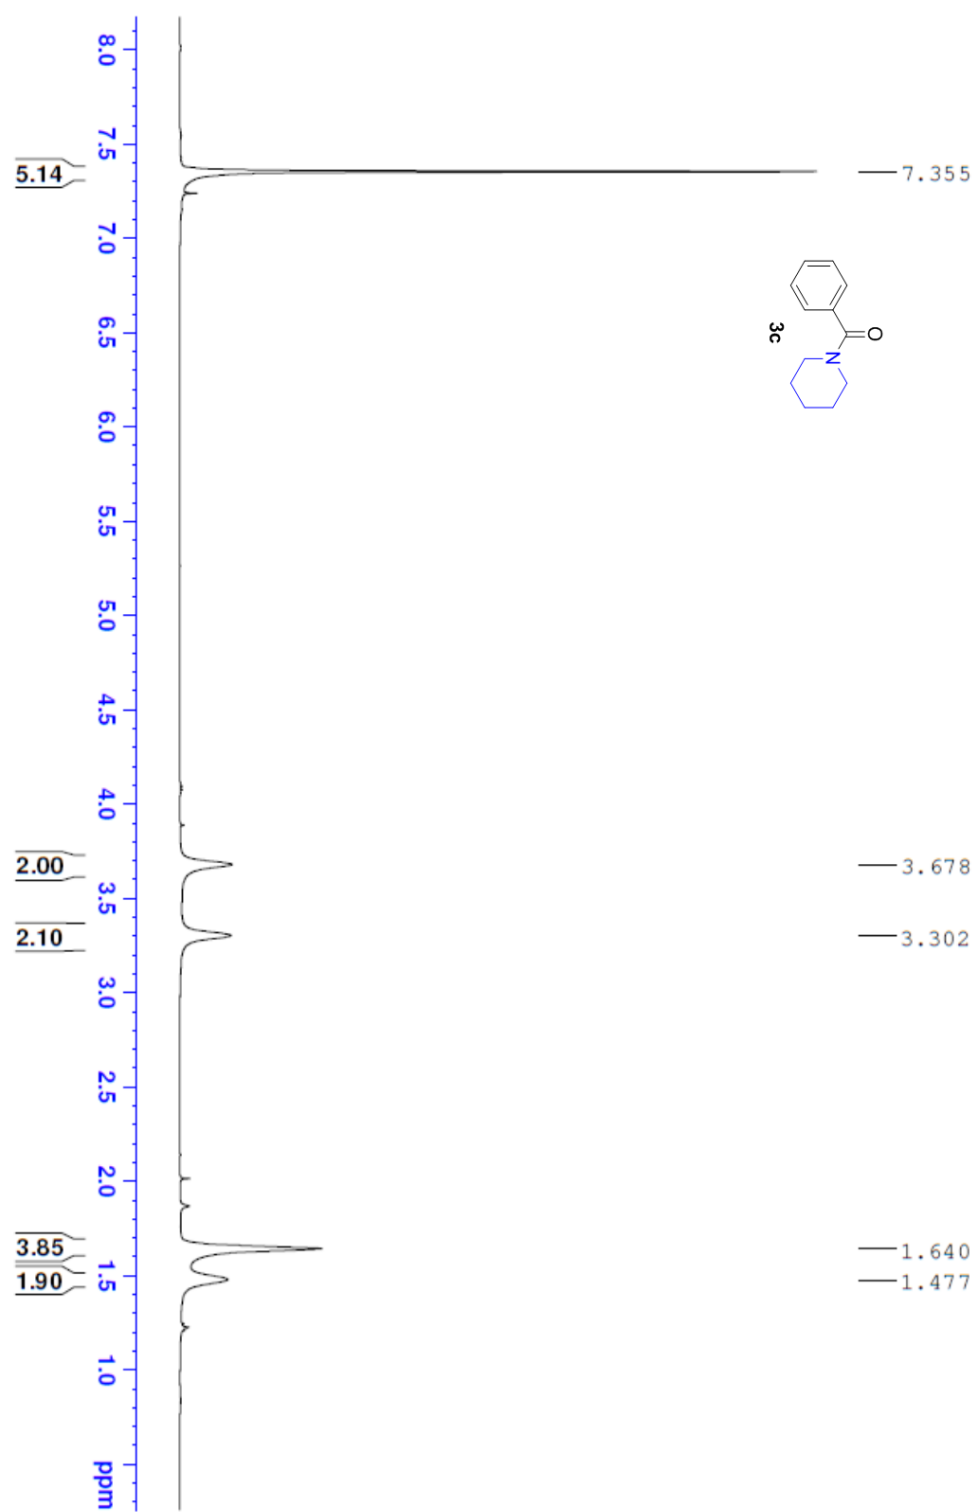

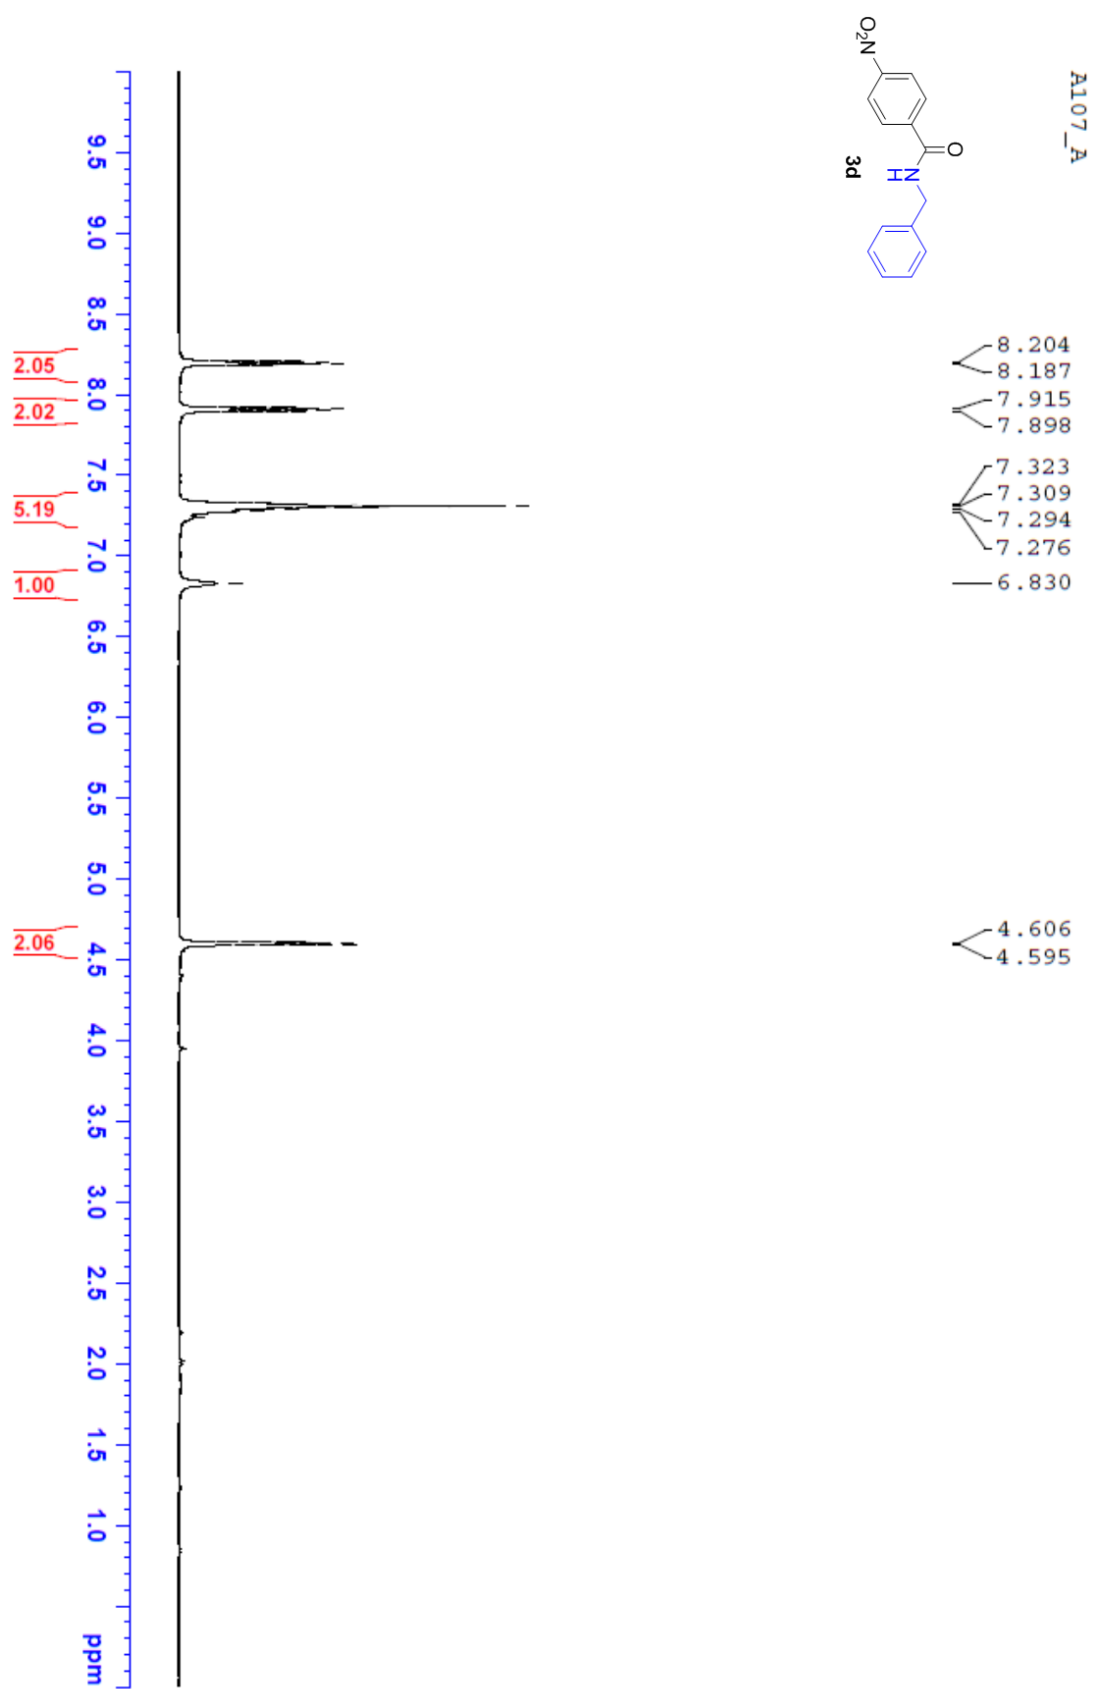

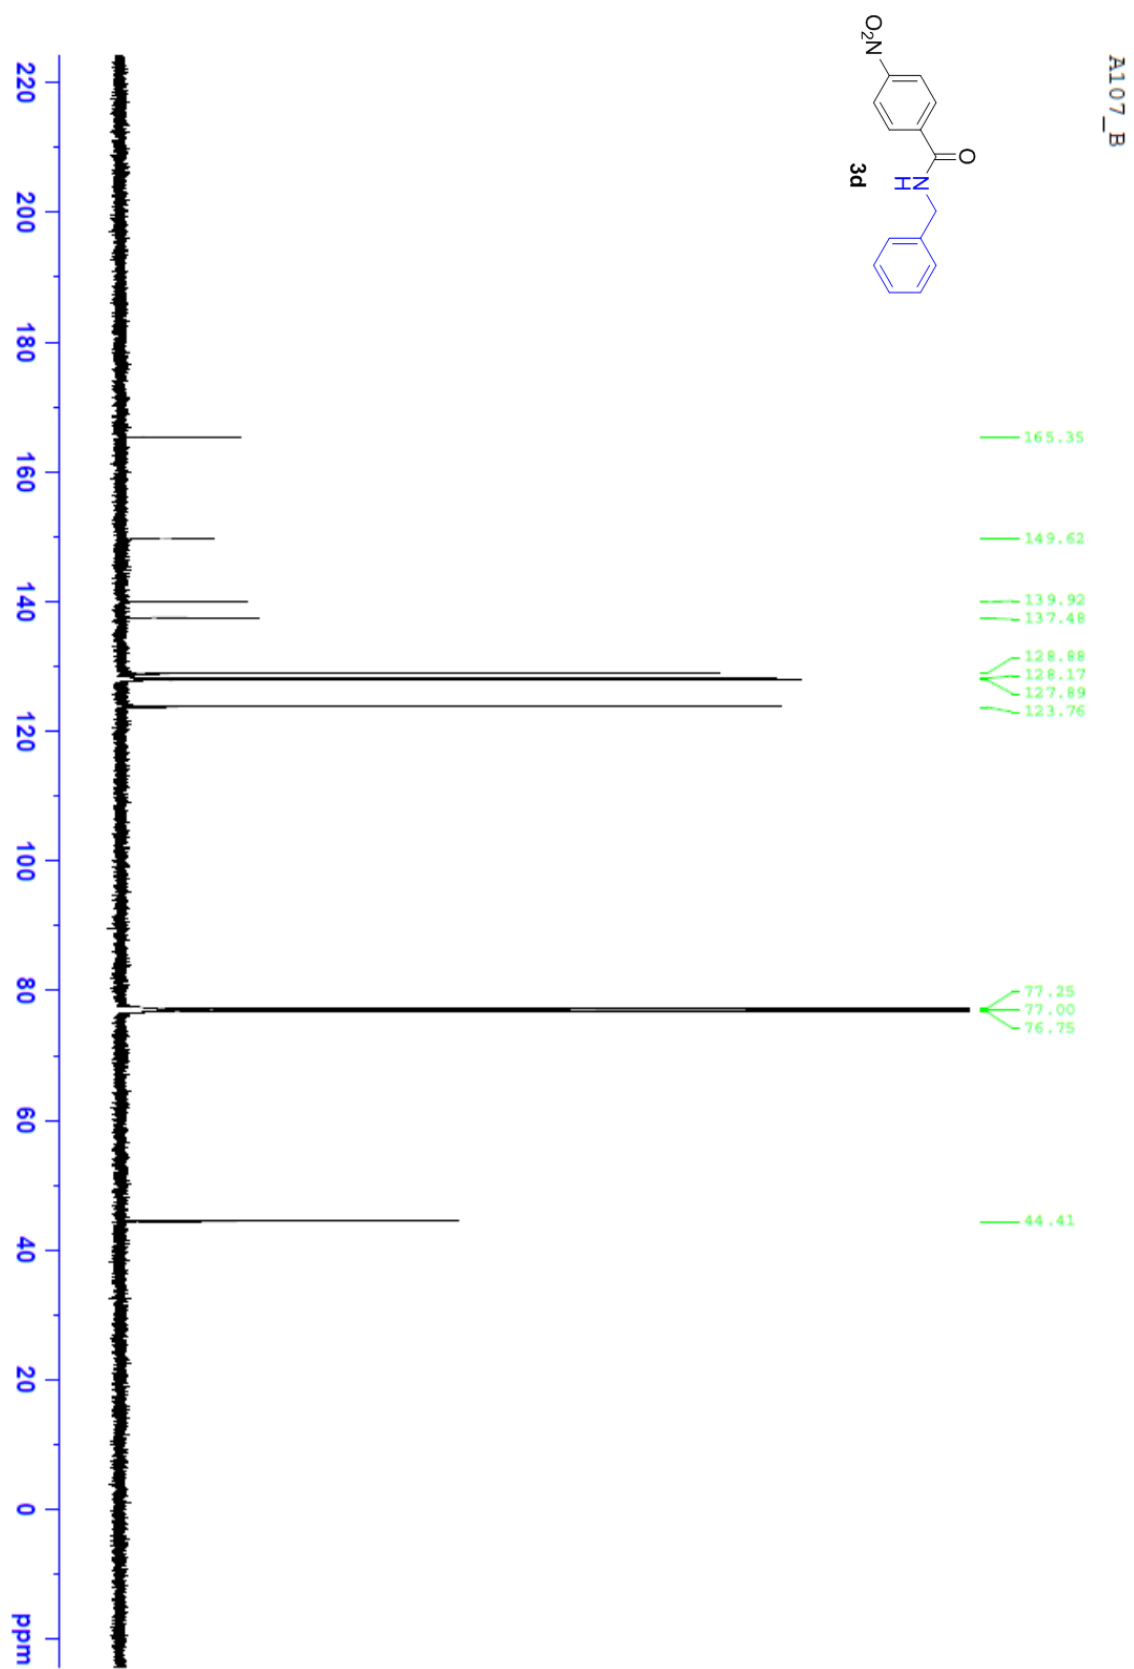

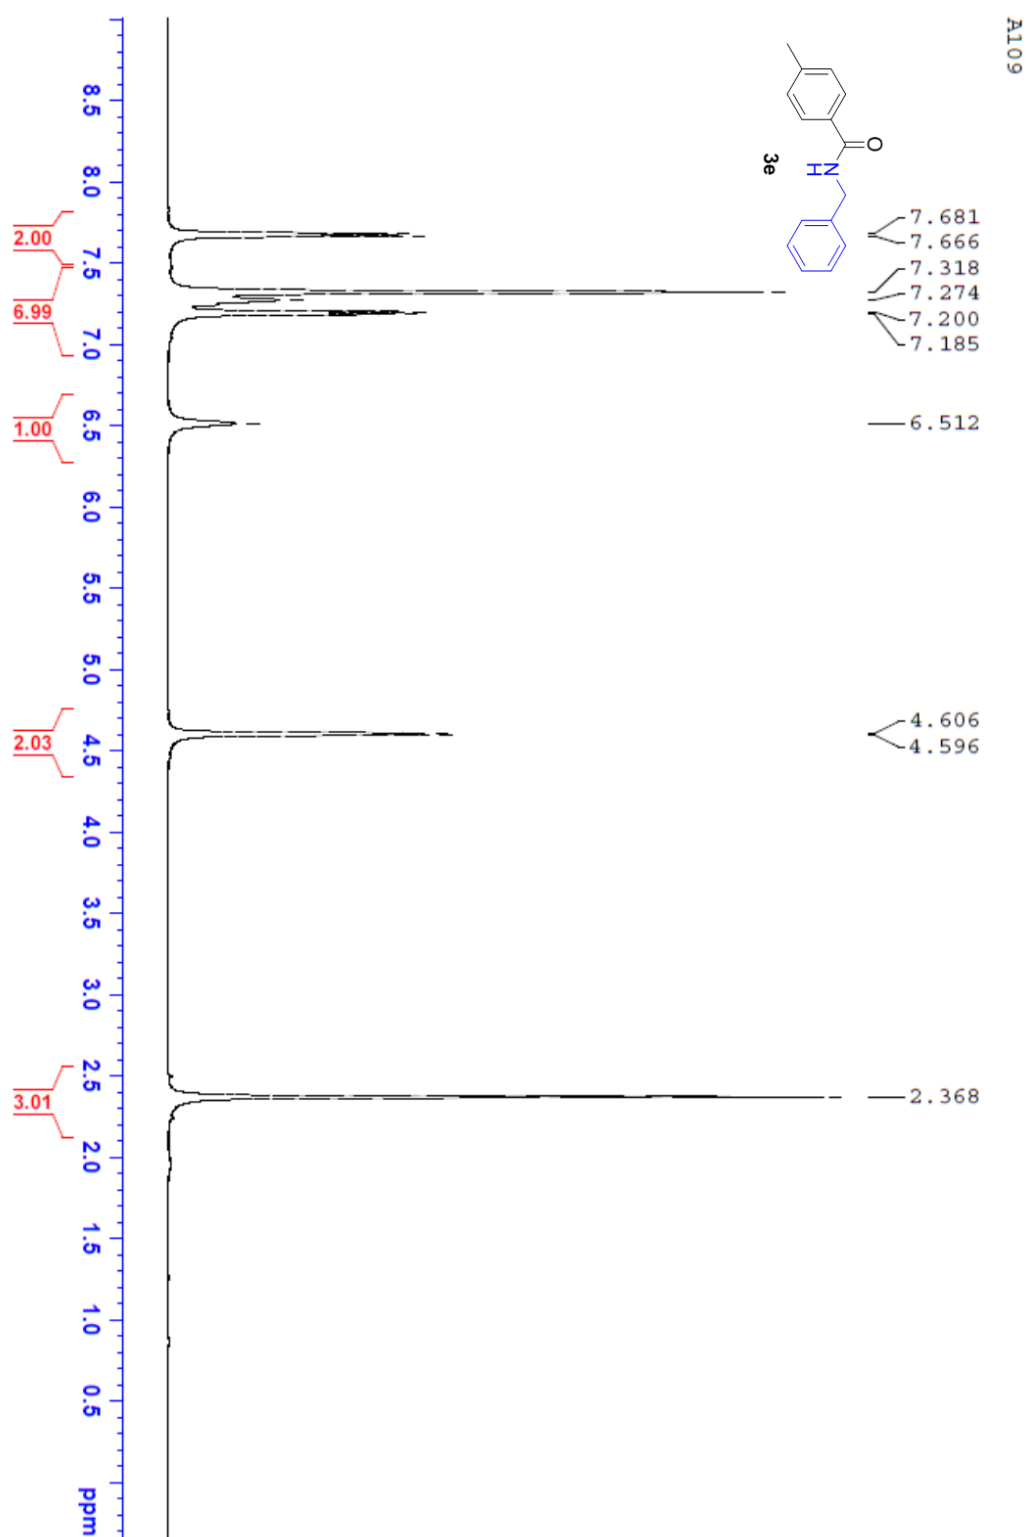

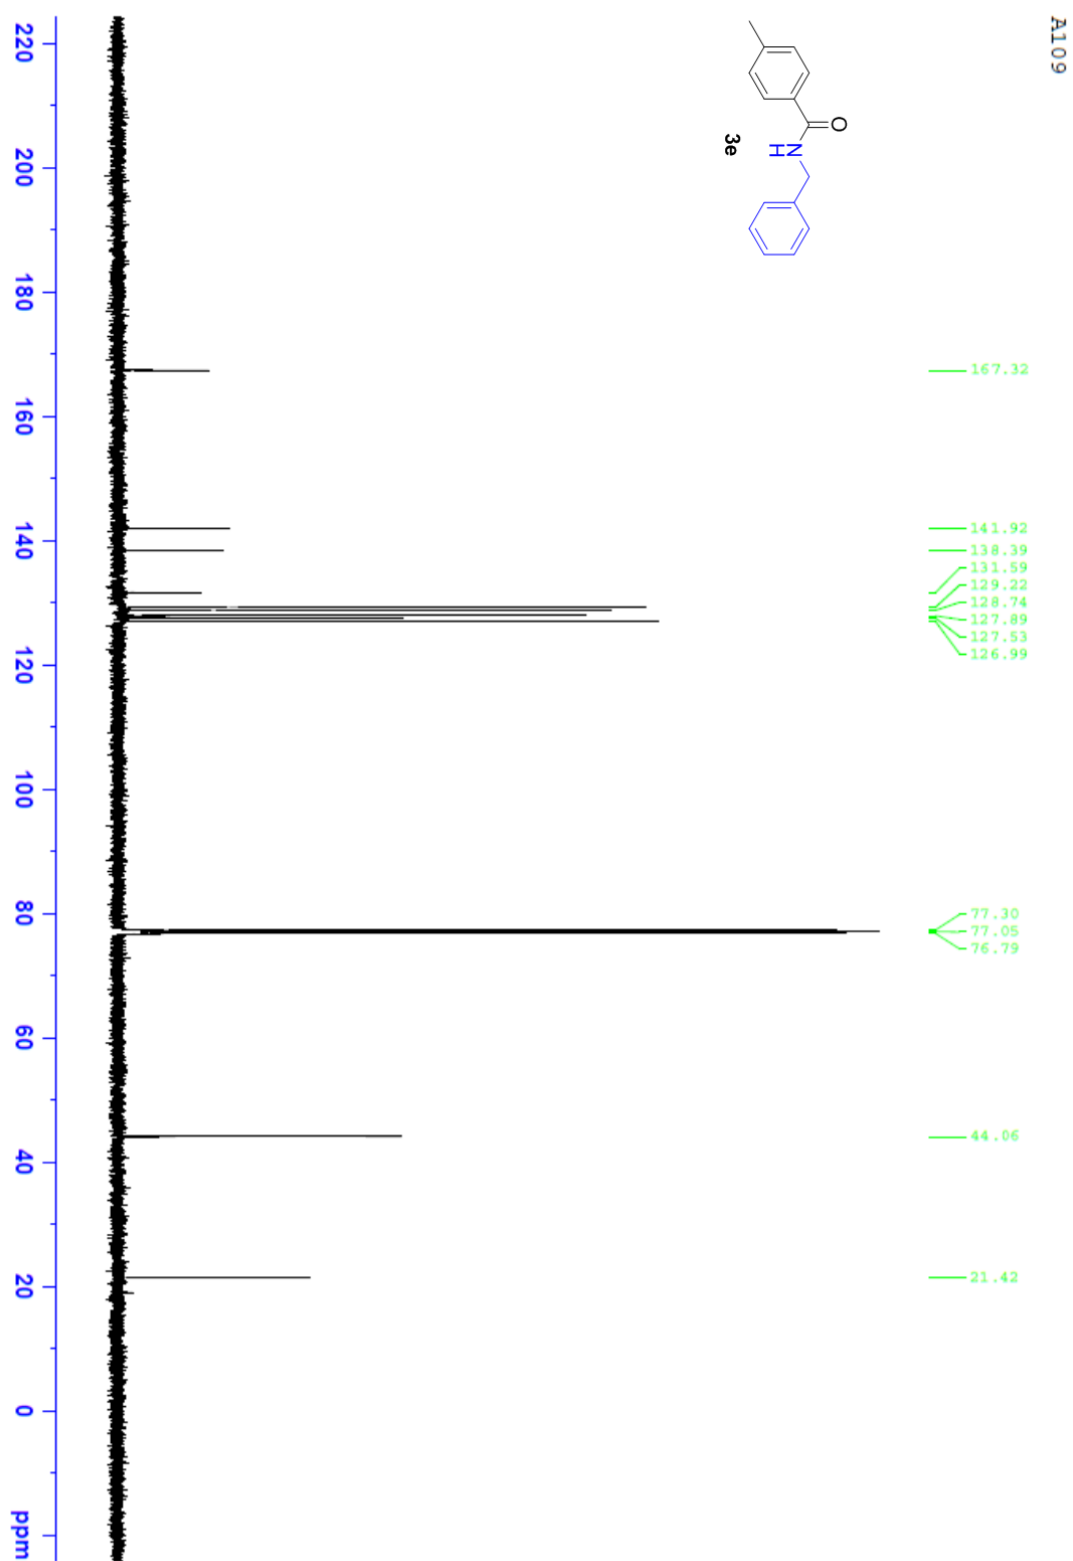

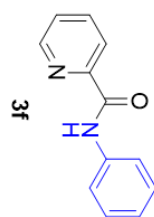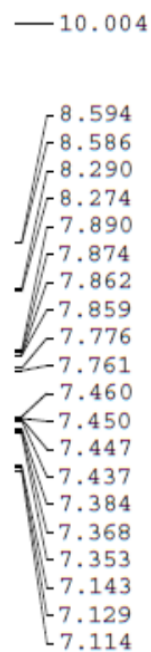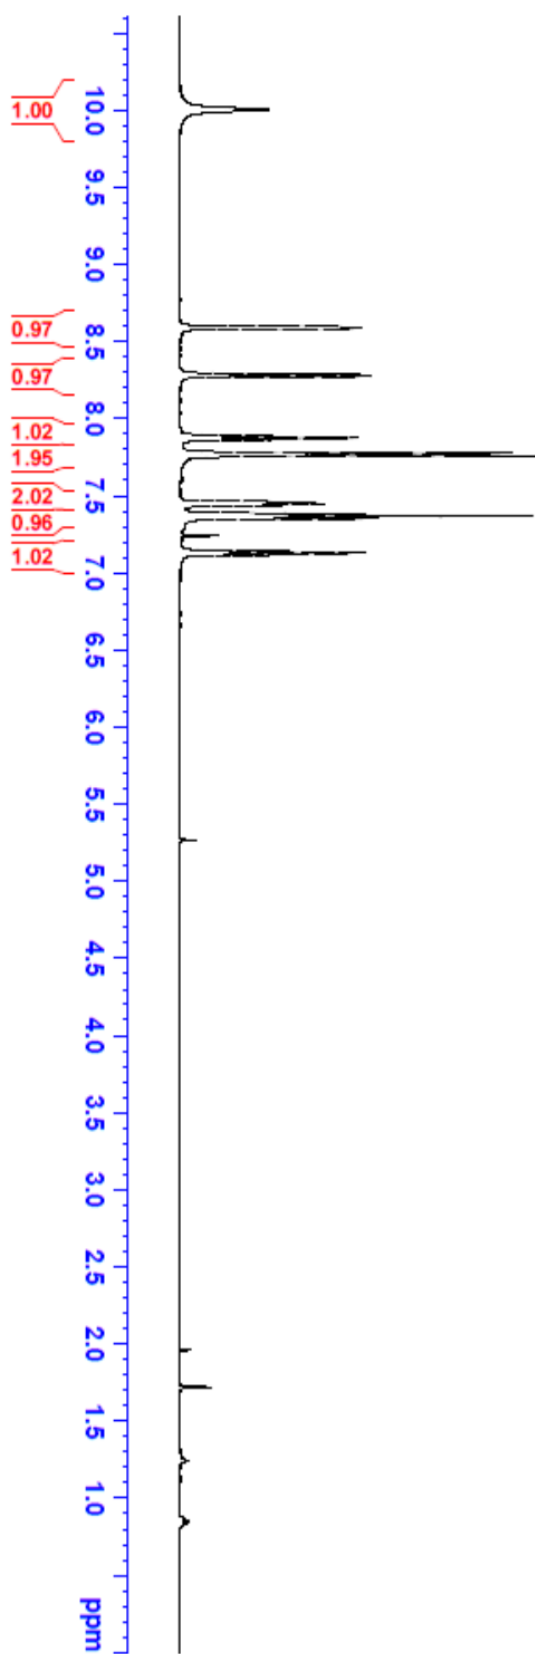

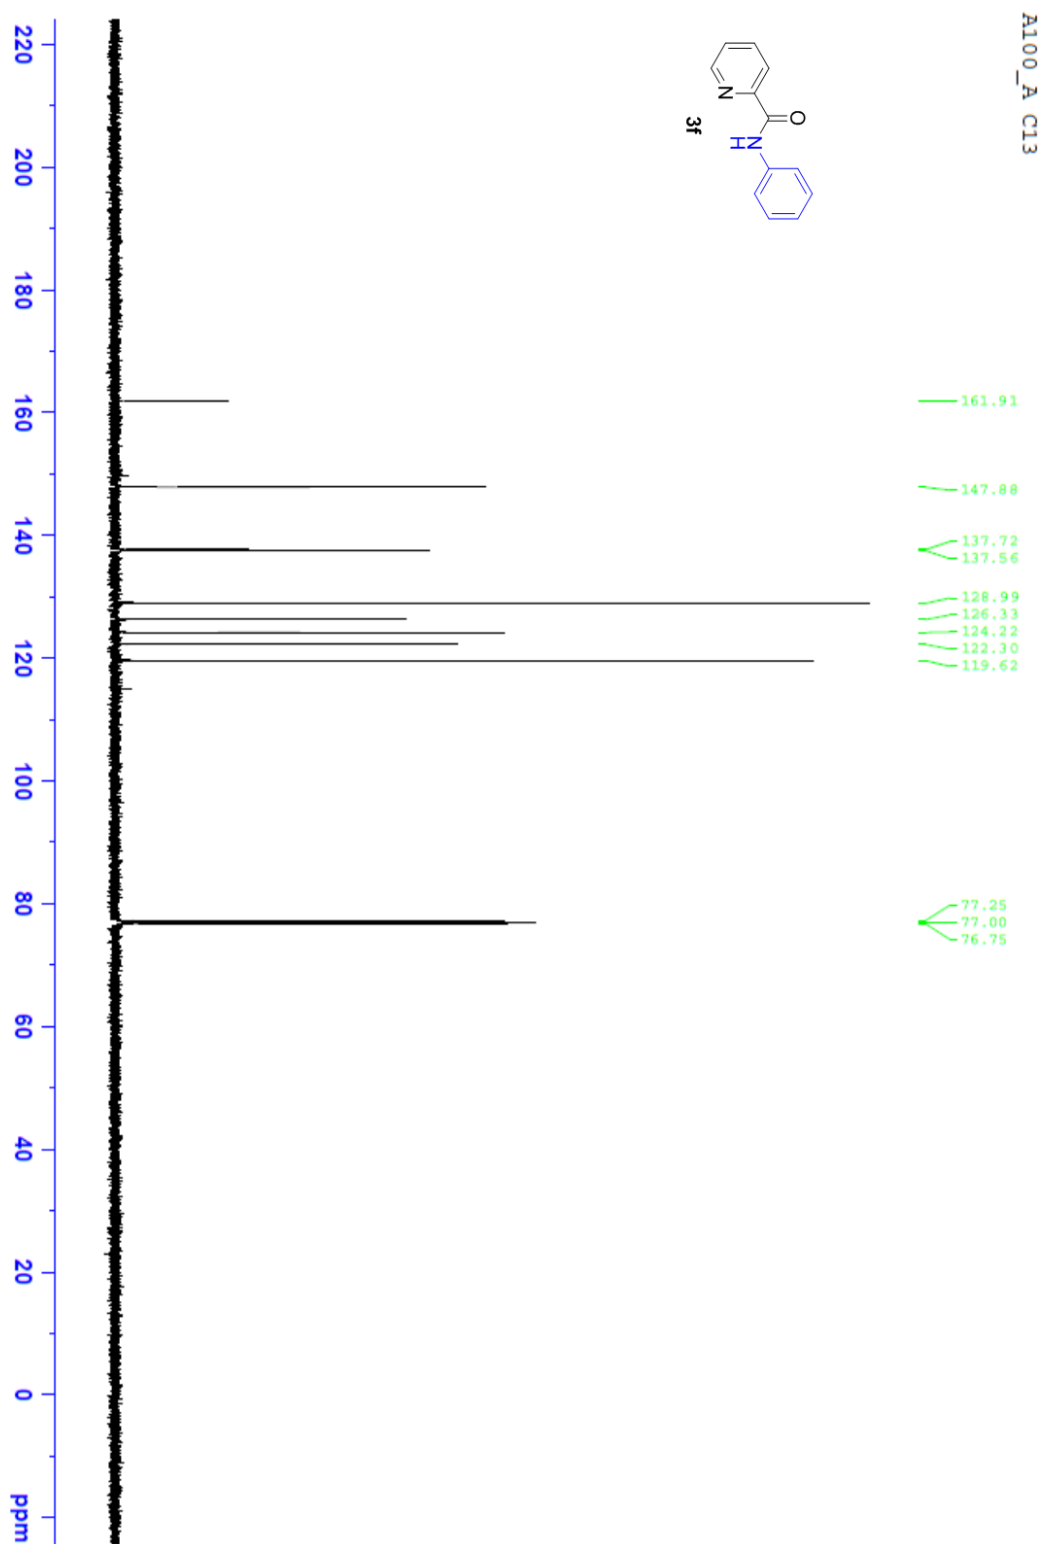

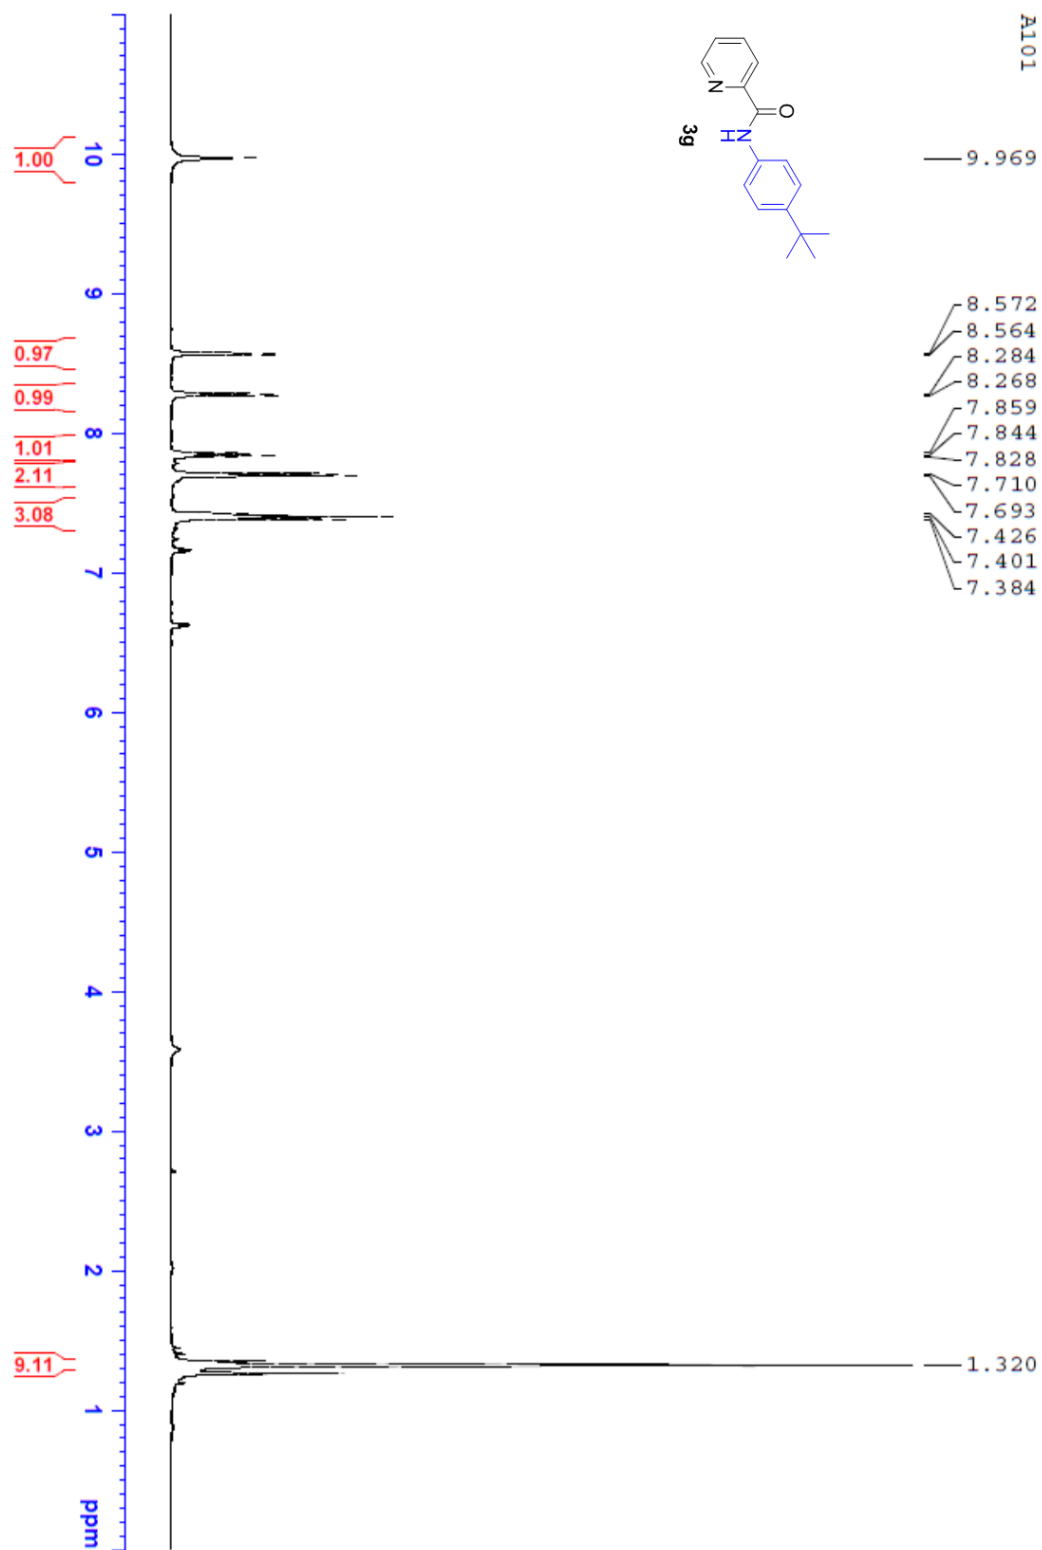

A101

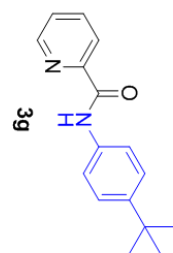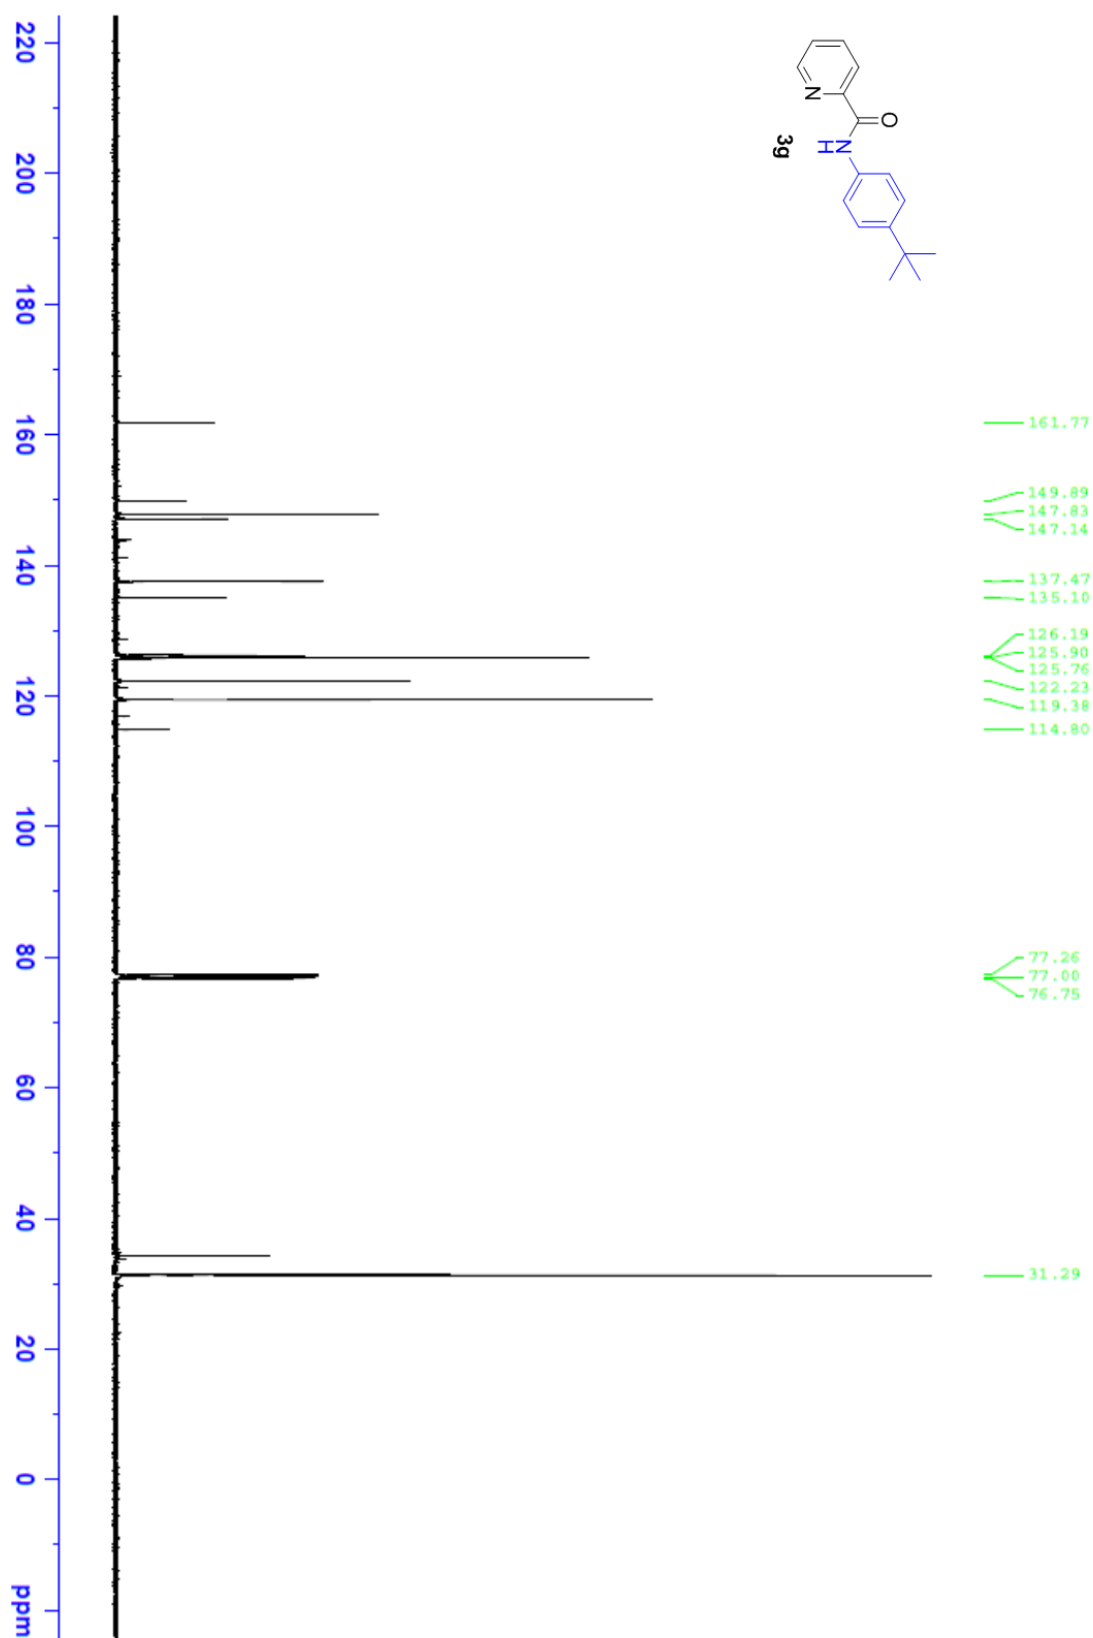

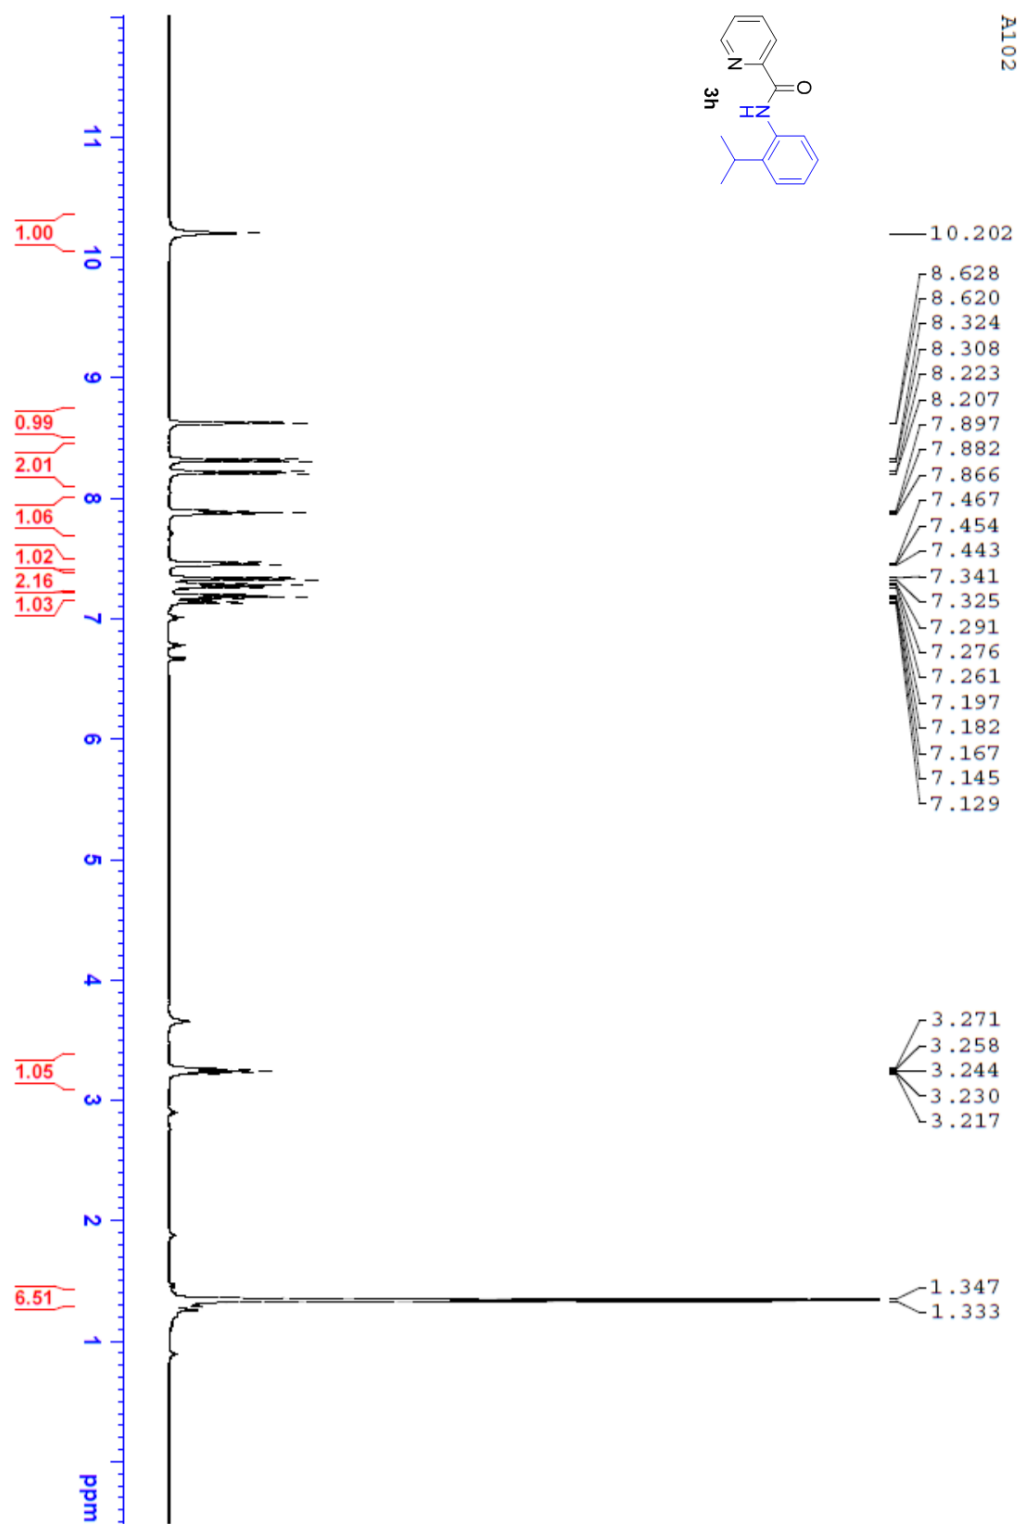

A102

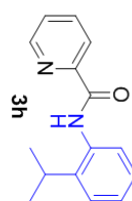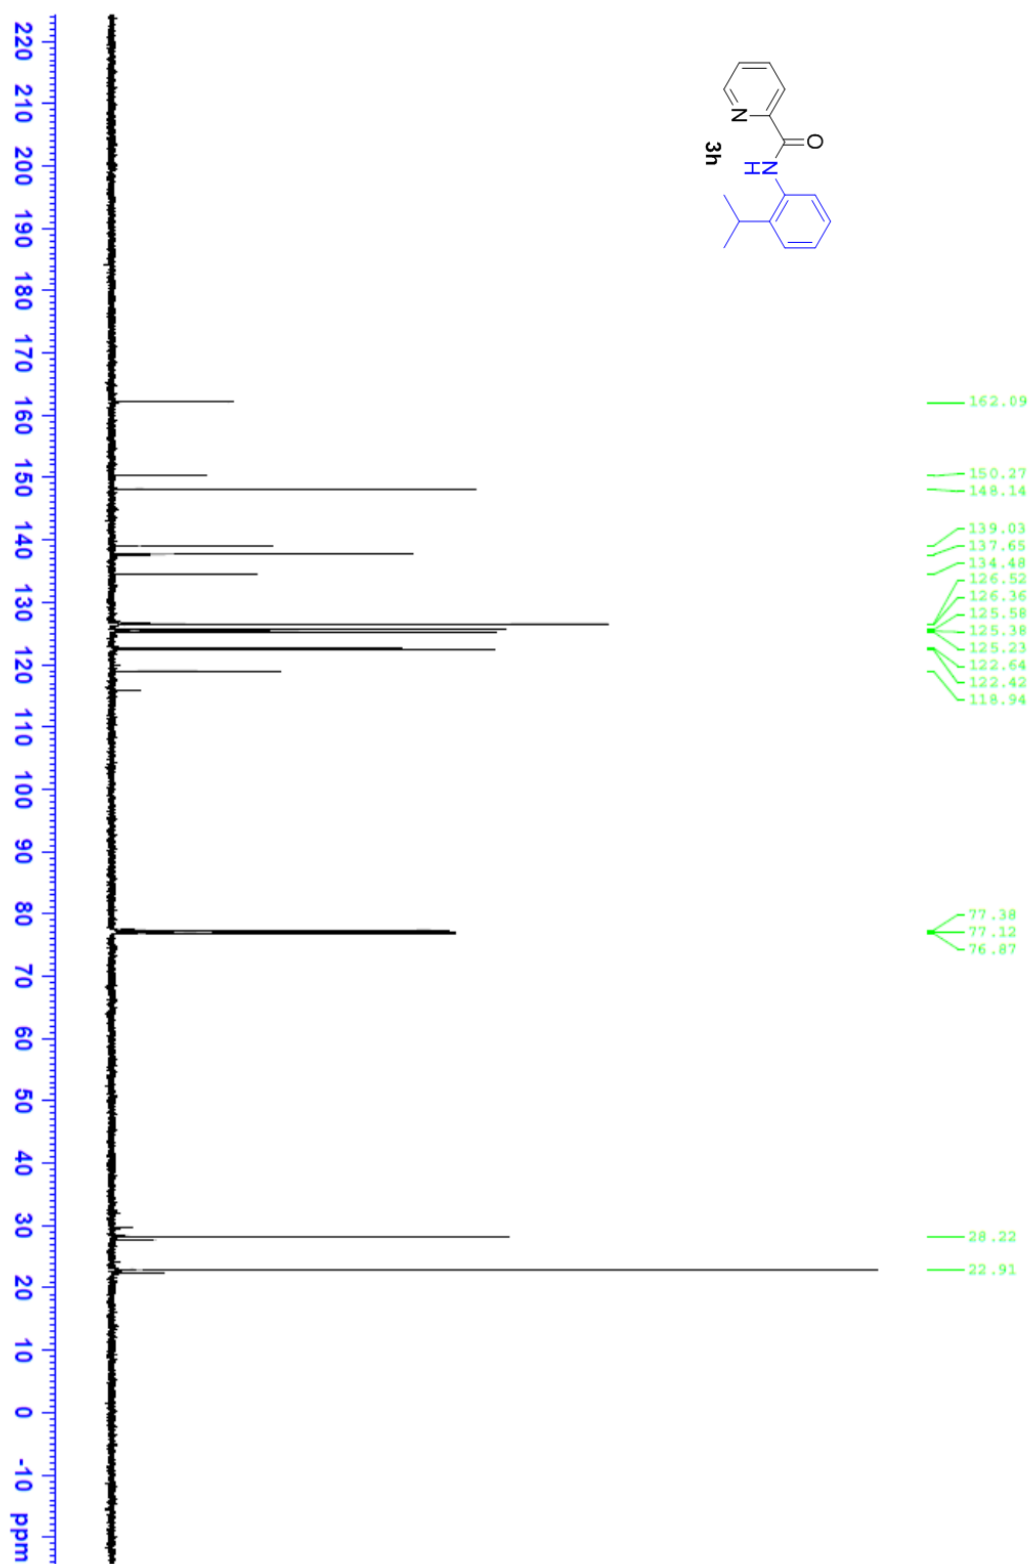

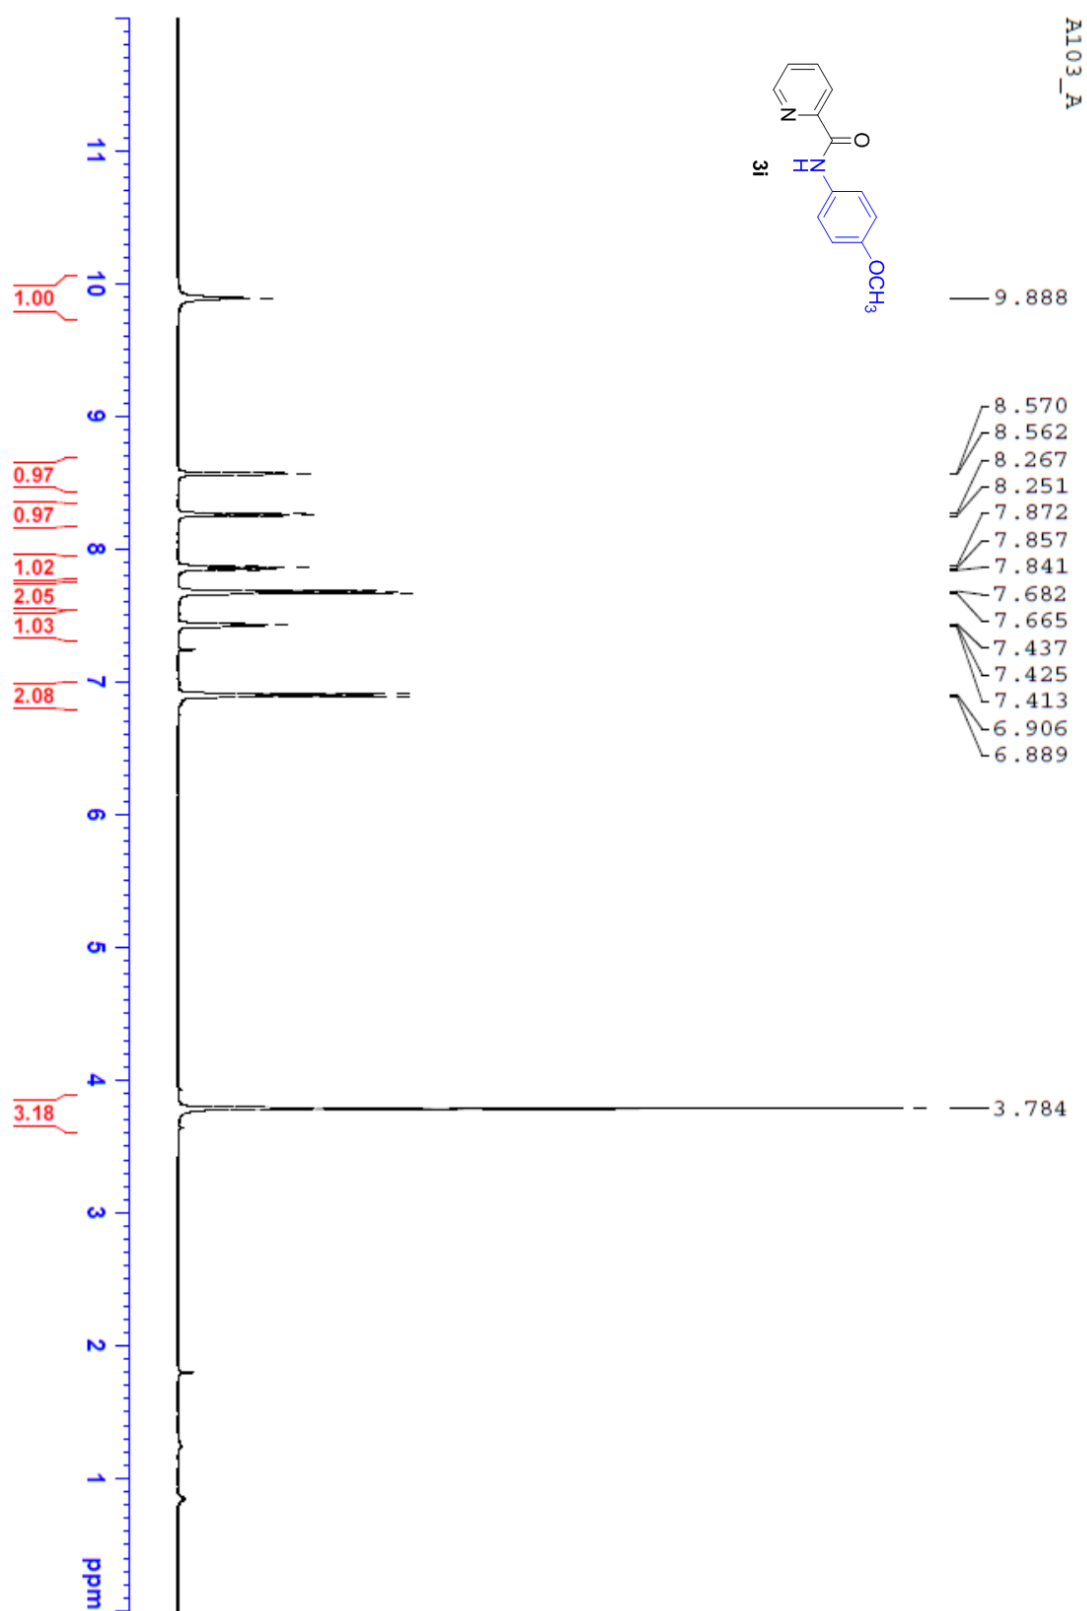

A103\_A

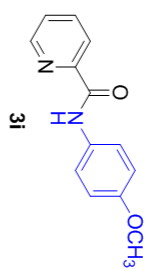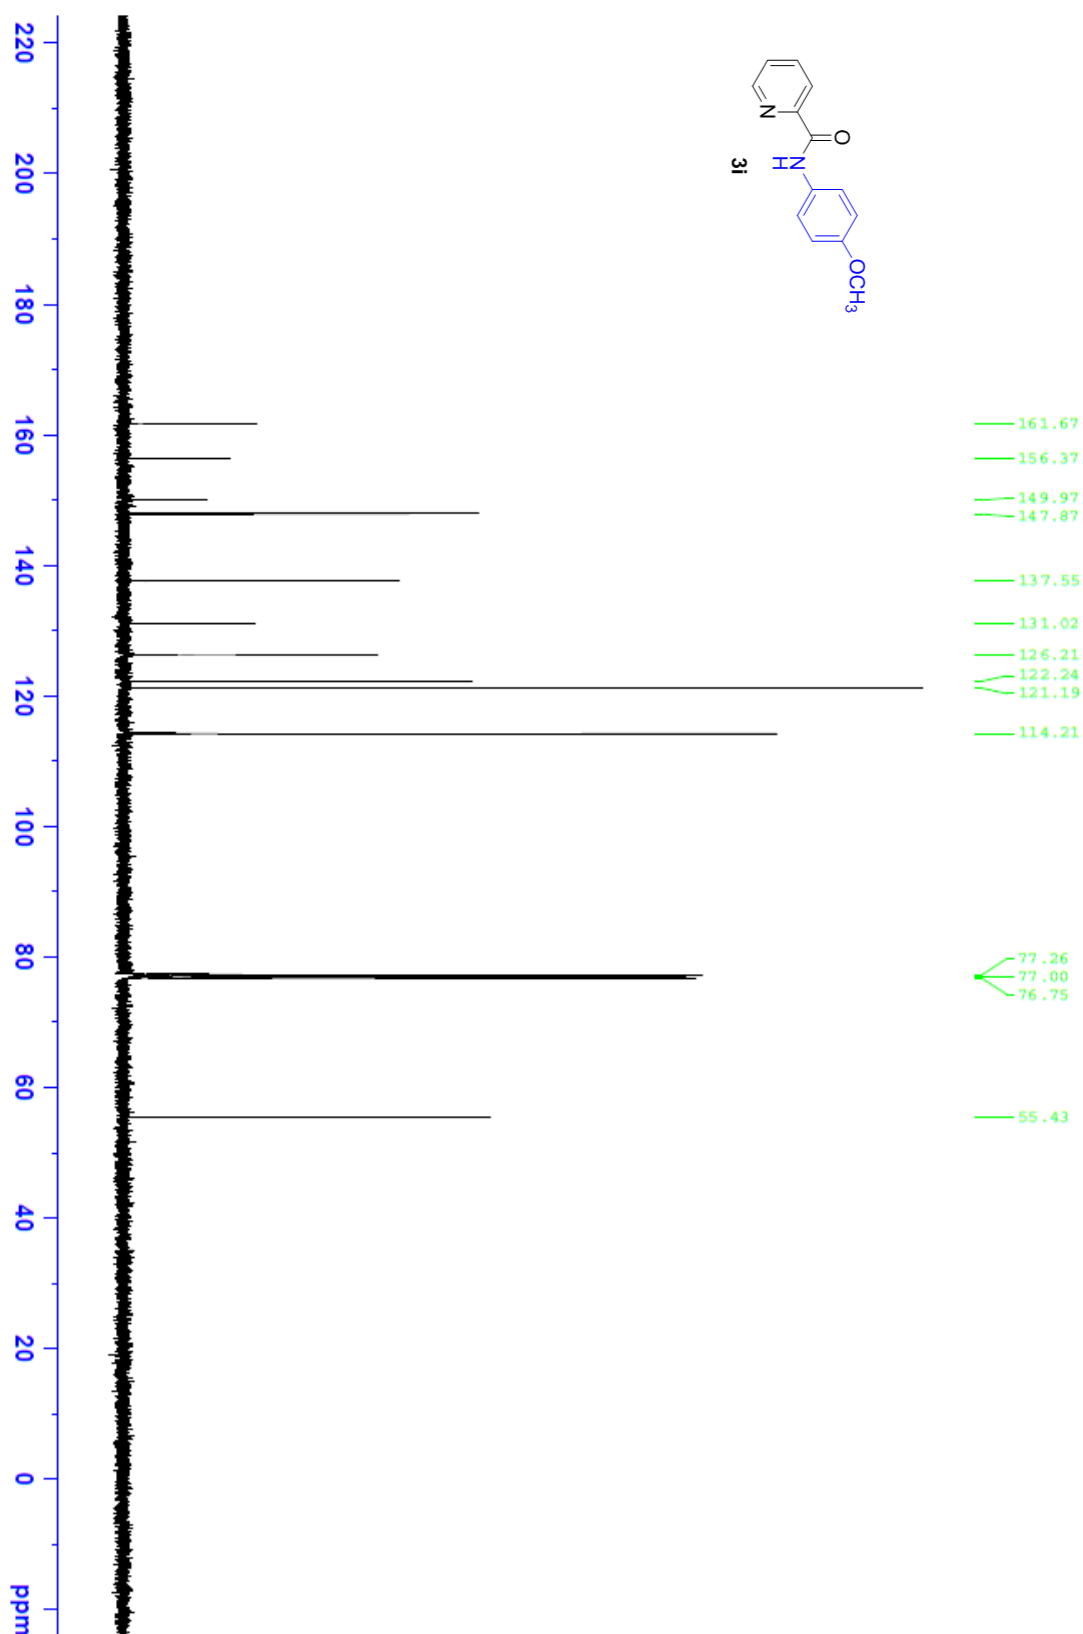

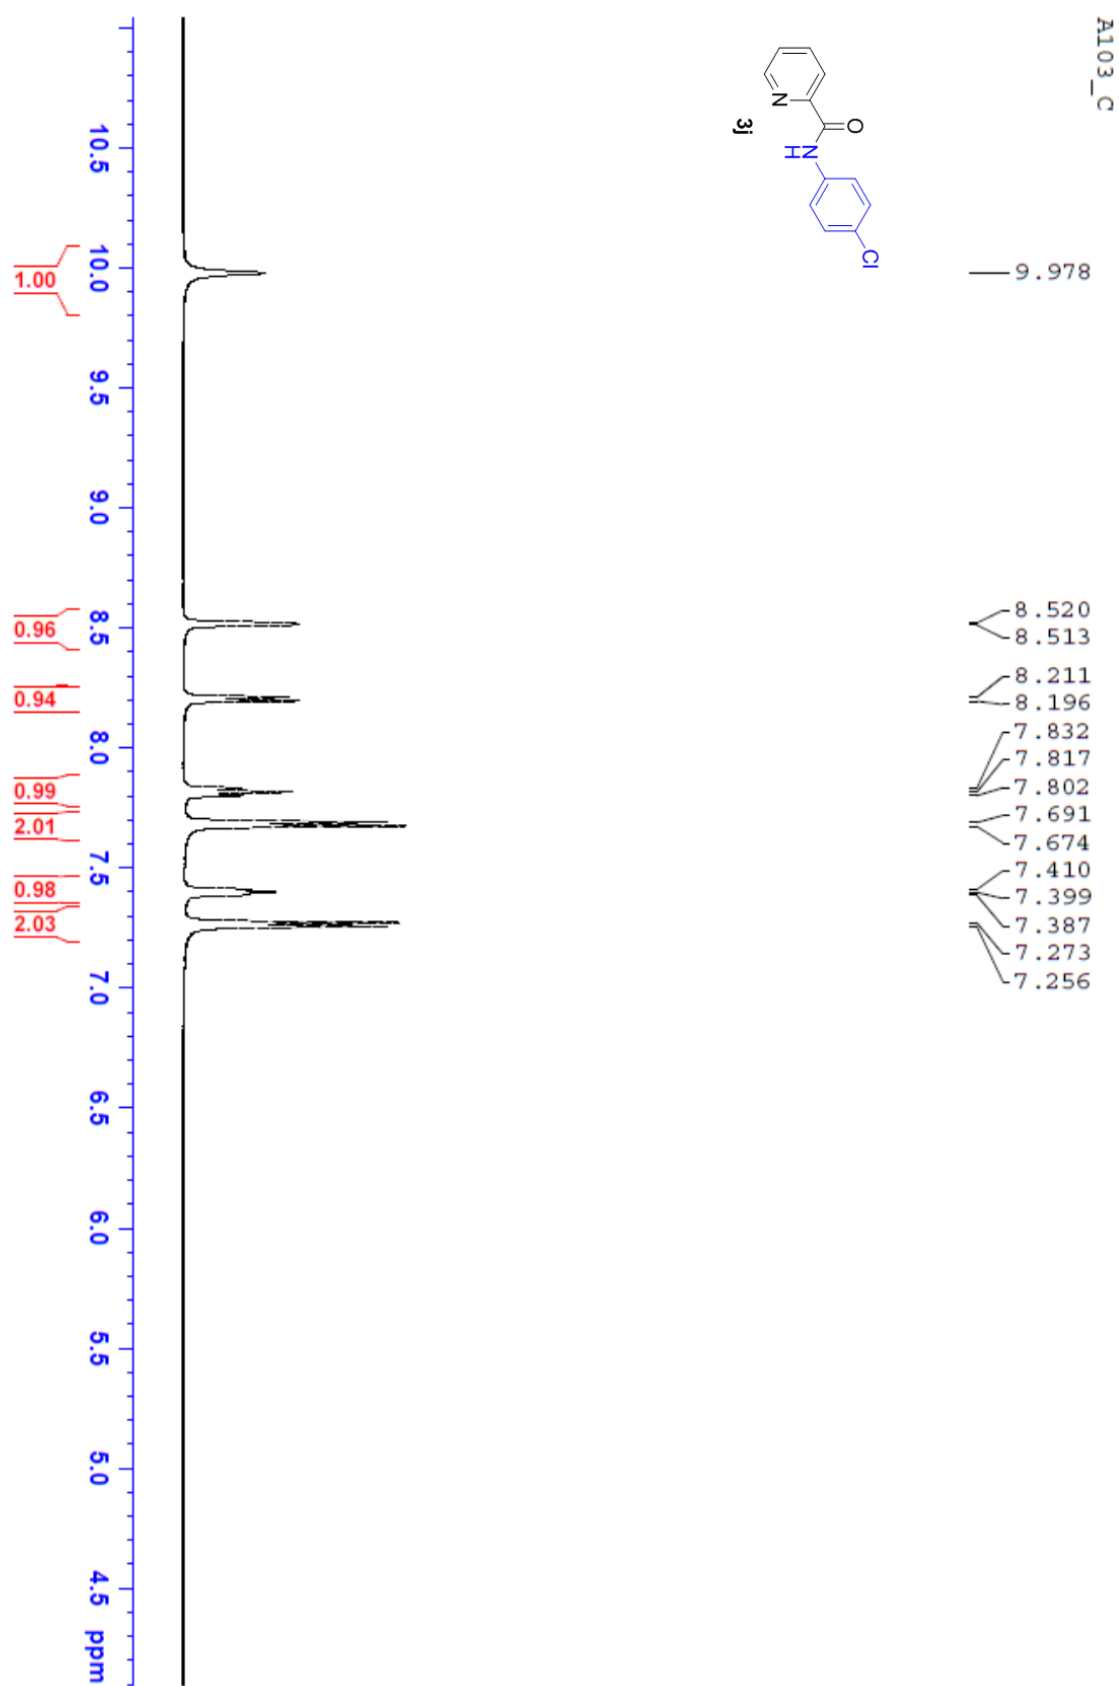

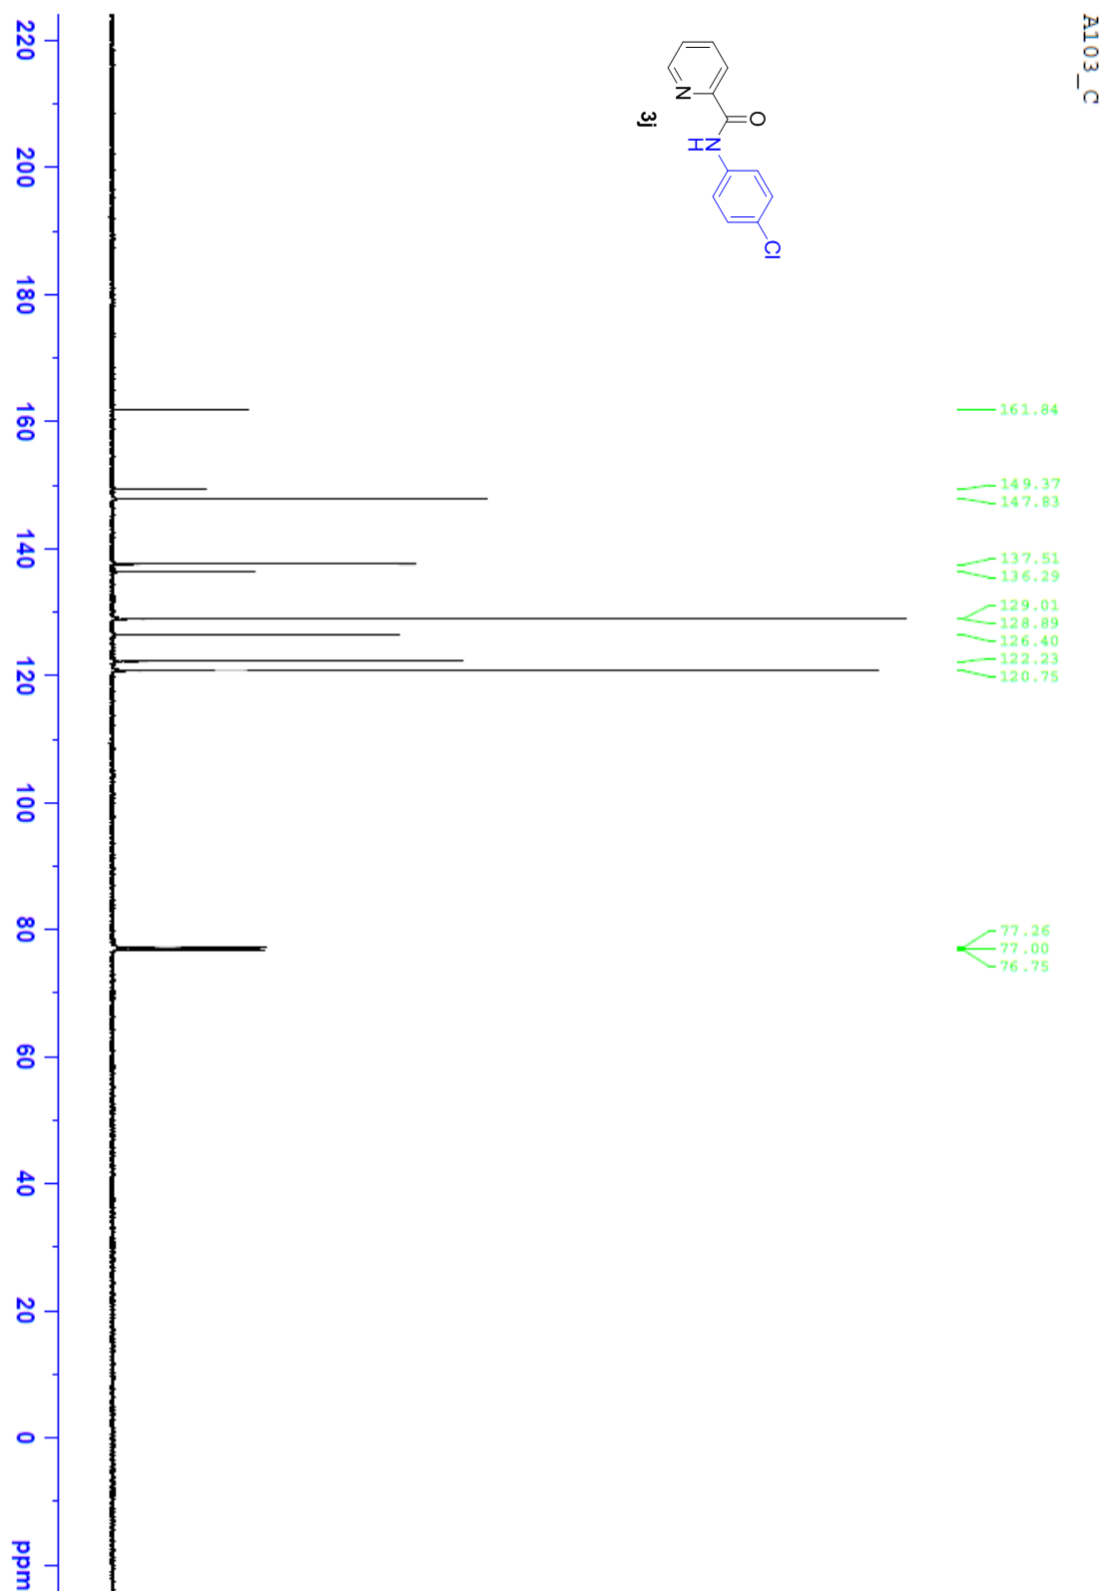

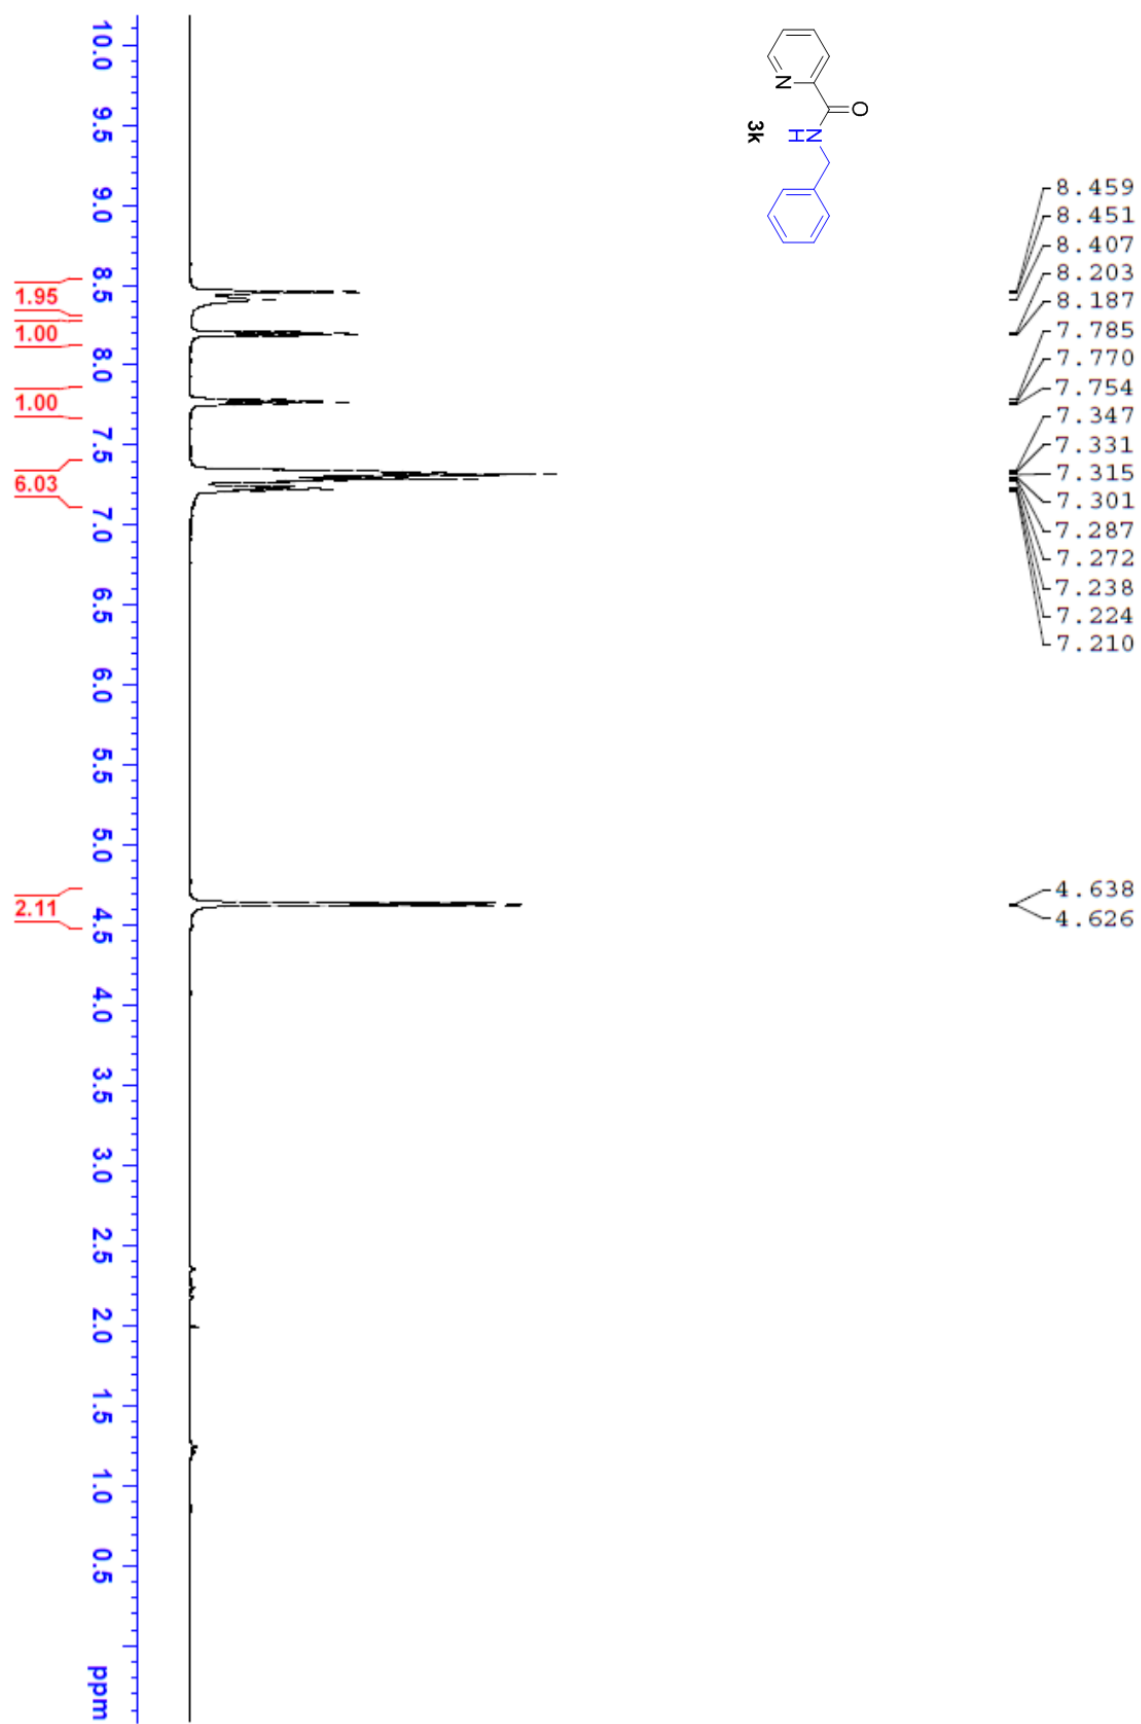

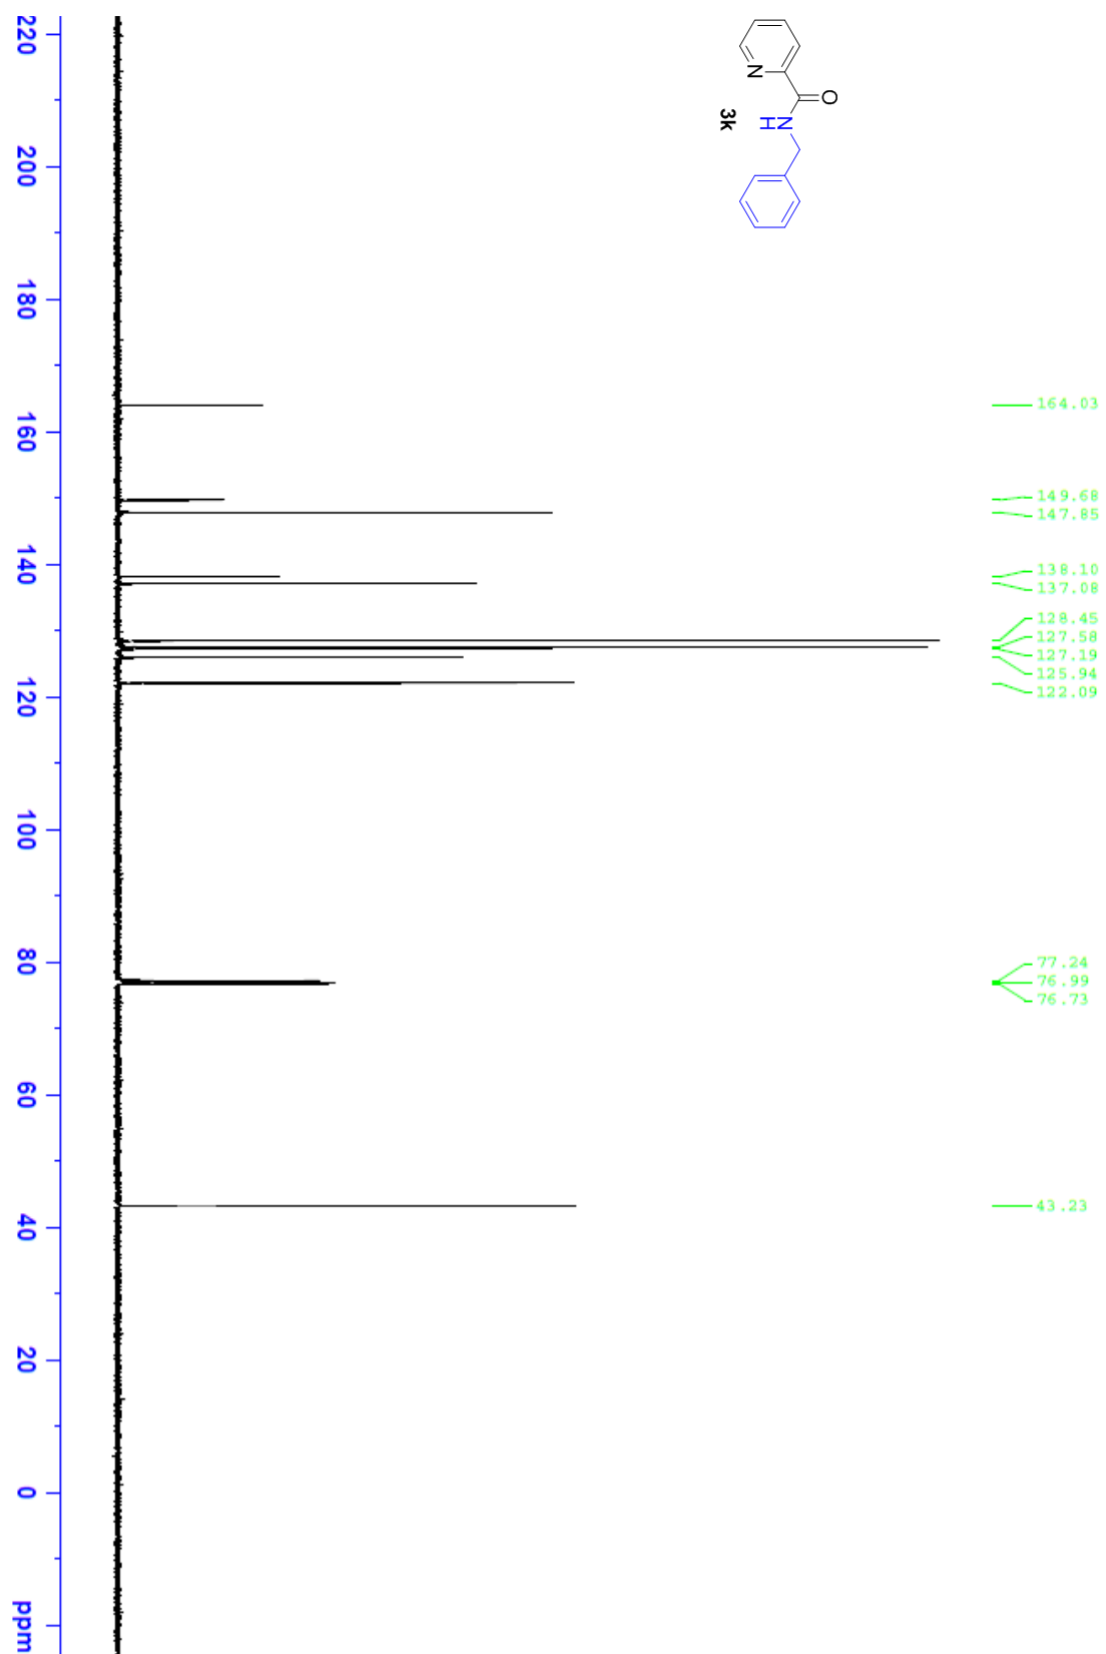

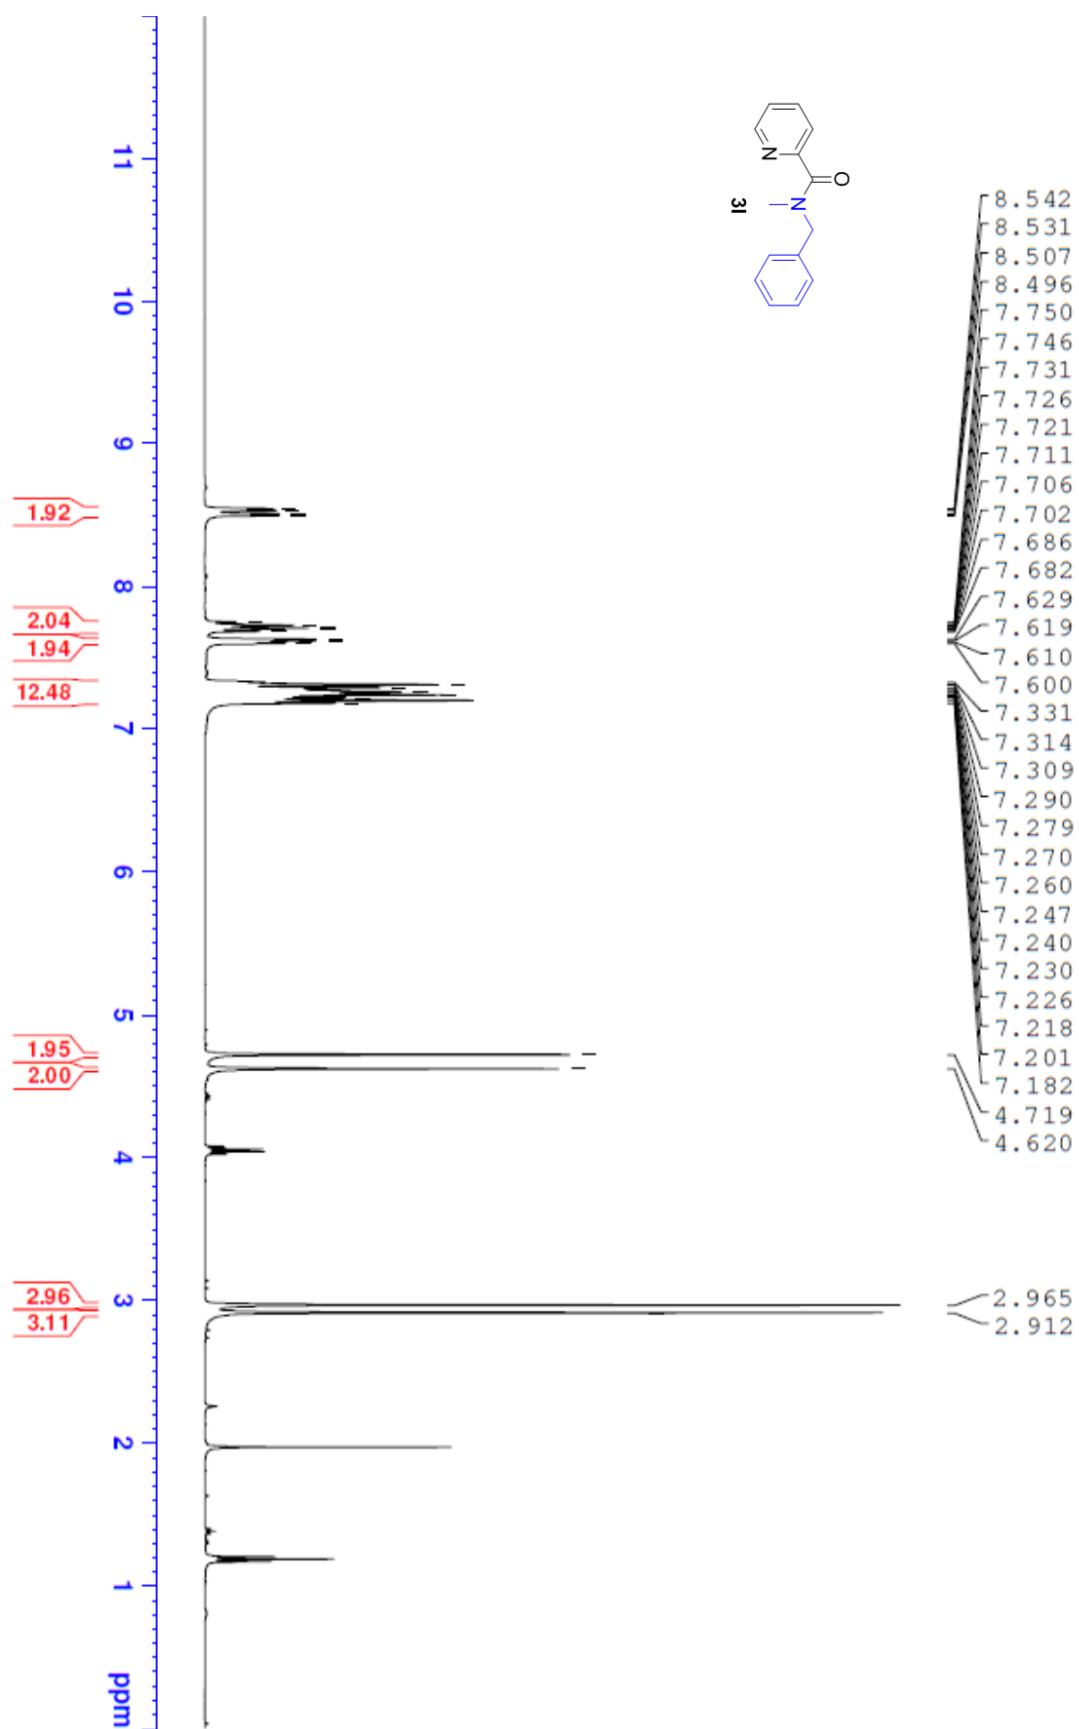

Aug15-2019-RT exp 6 13c

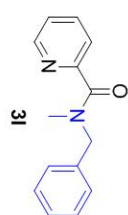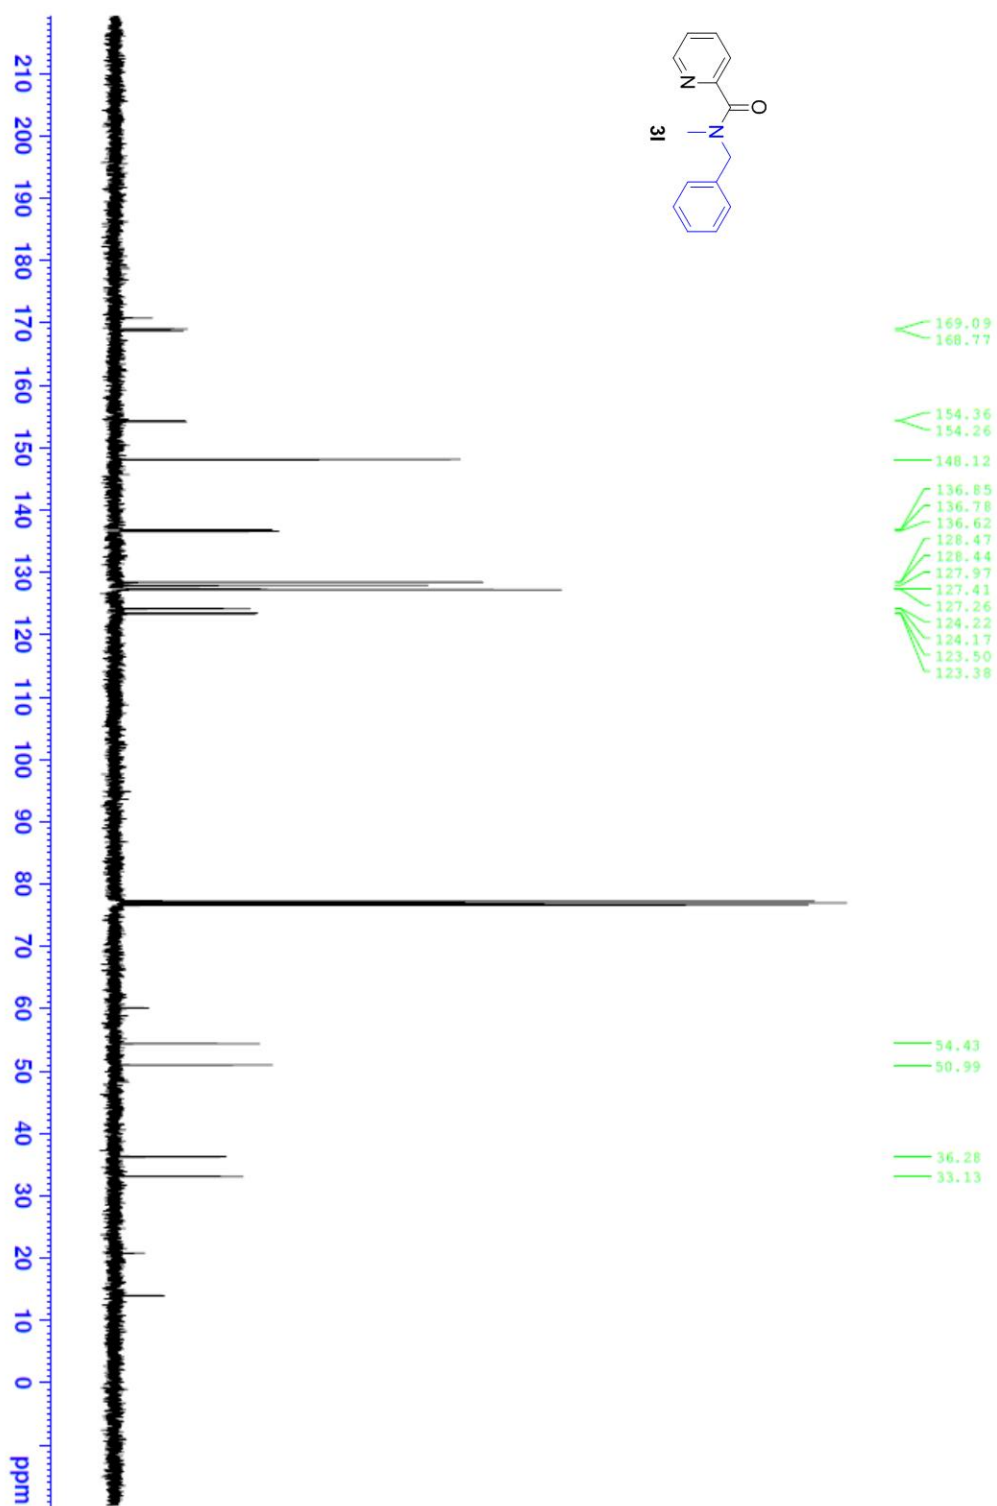

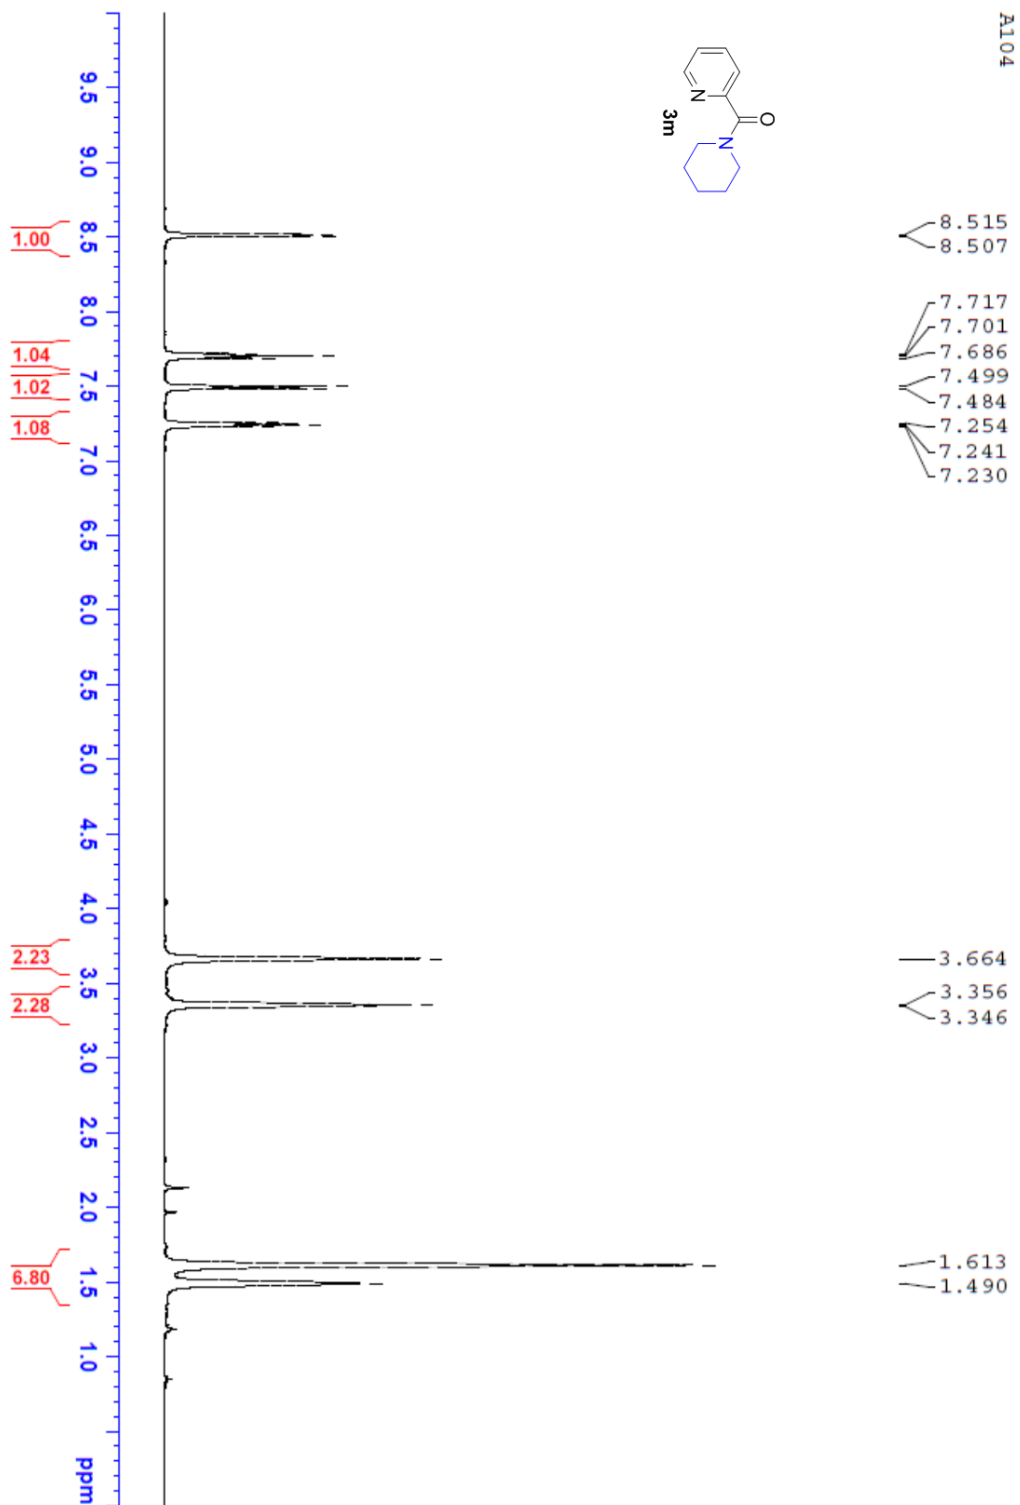

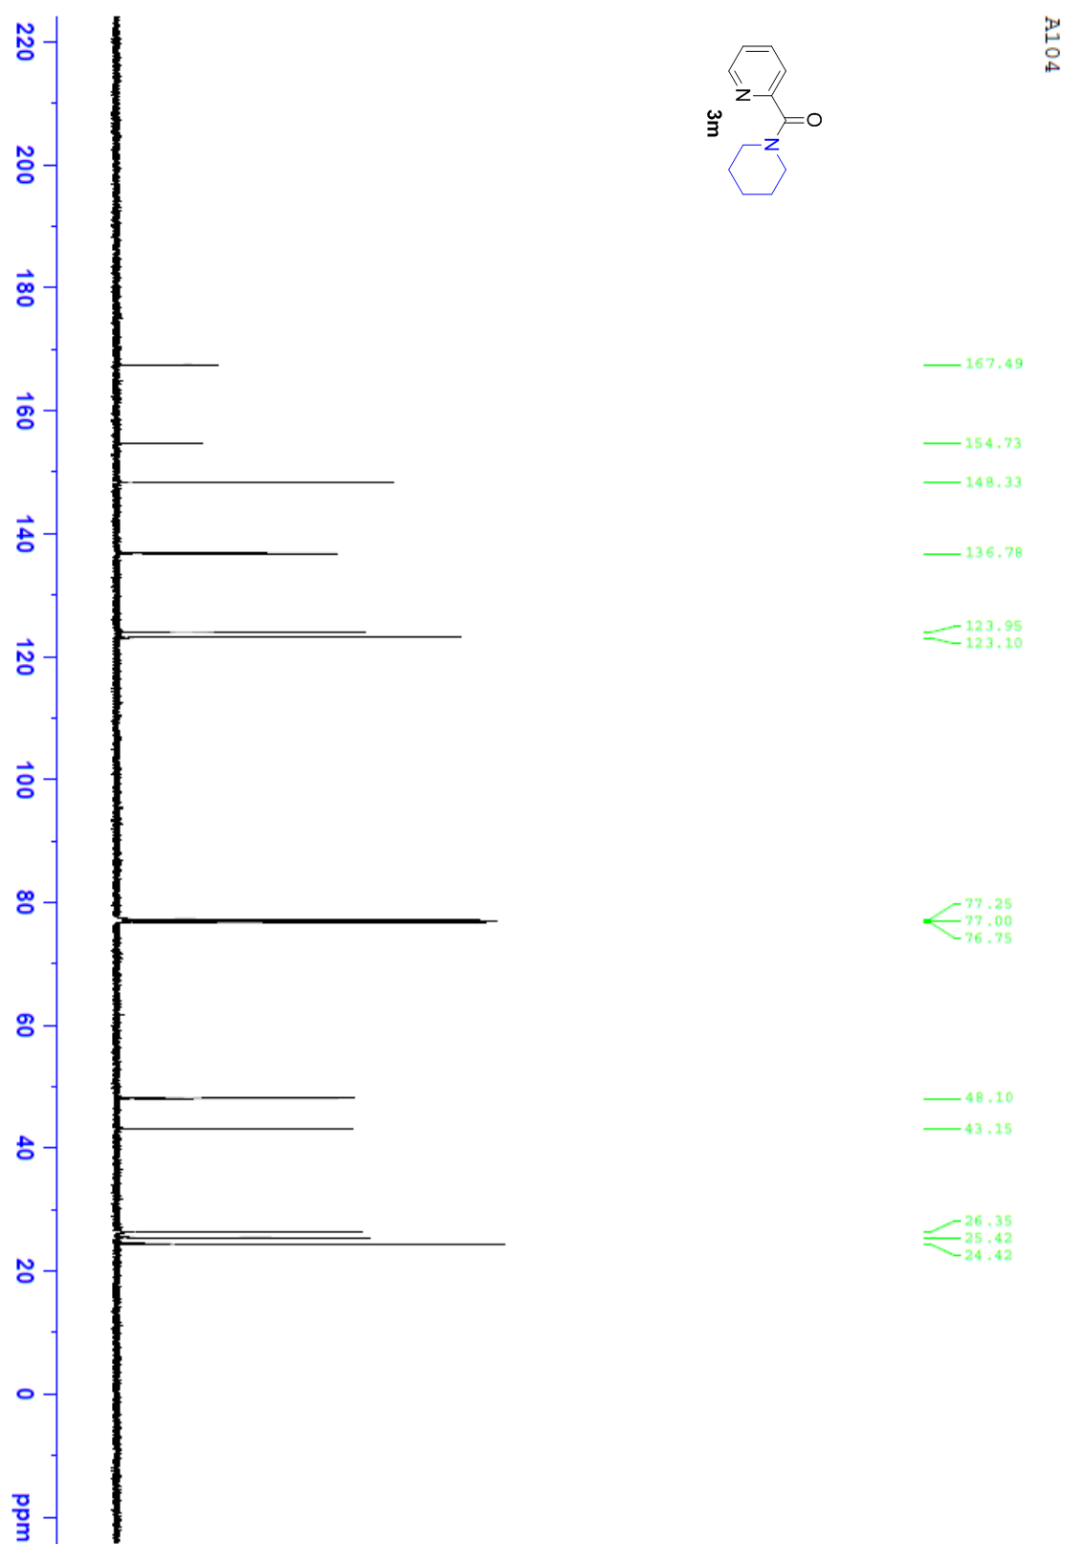

A105

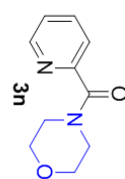

8.505  
8.497  
7.743  
7.728  
7.712  
7.606  
7.591  
7.282  
7.270  
7.258

3.730  
3.601  
3.585

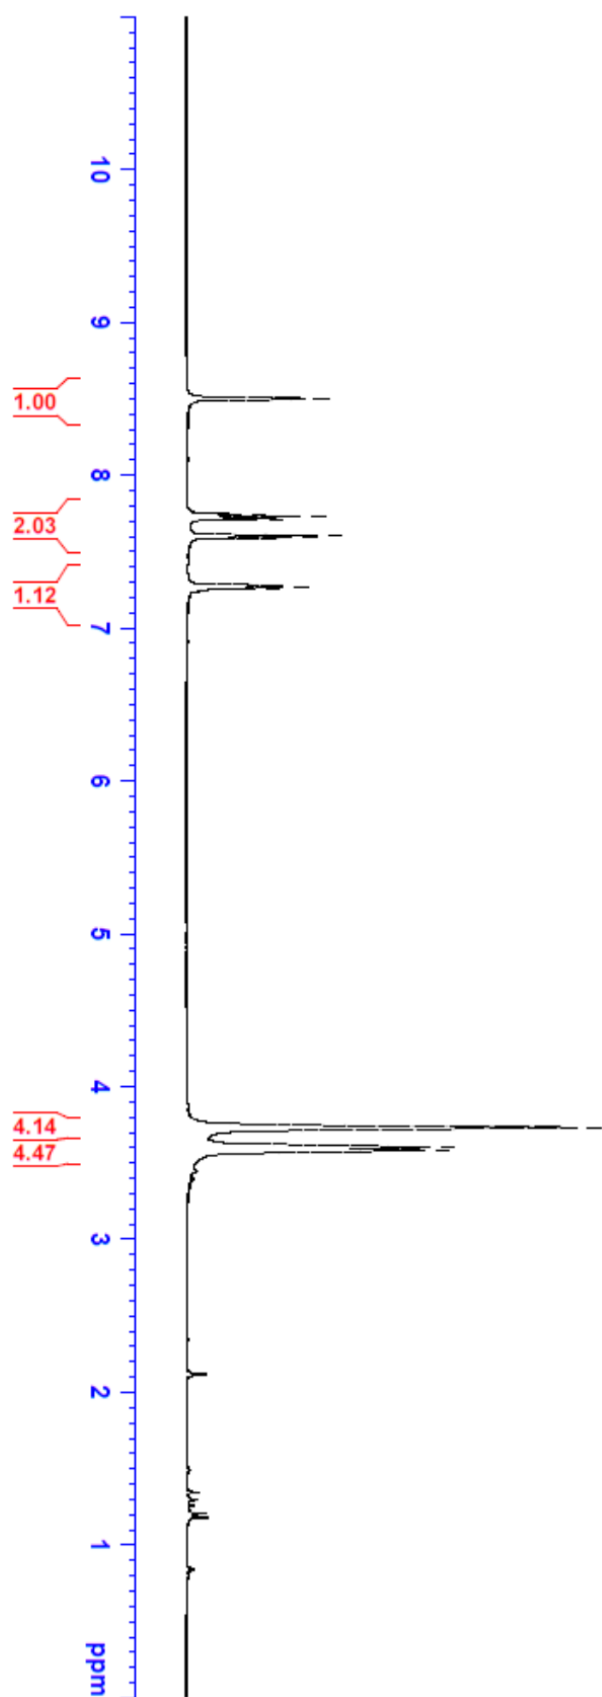

A105

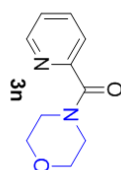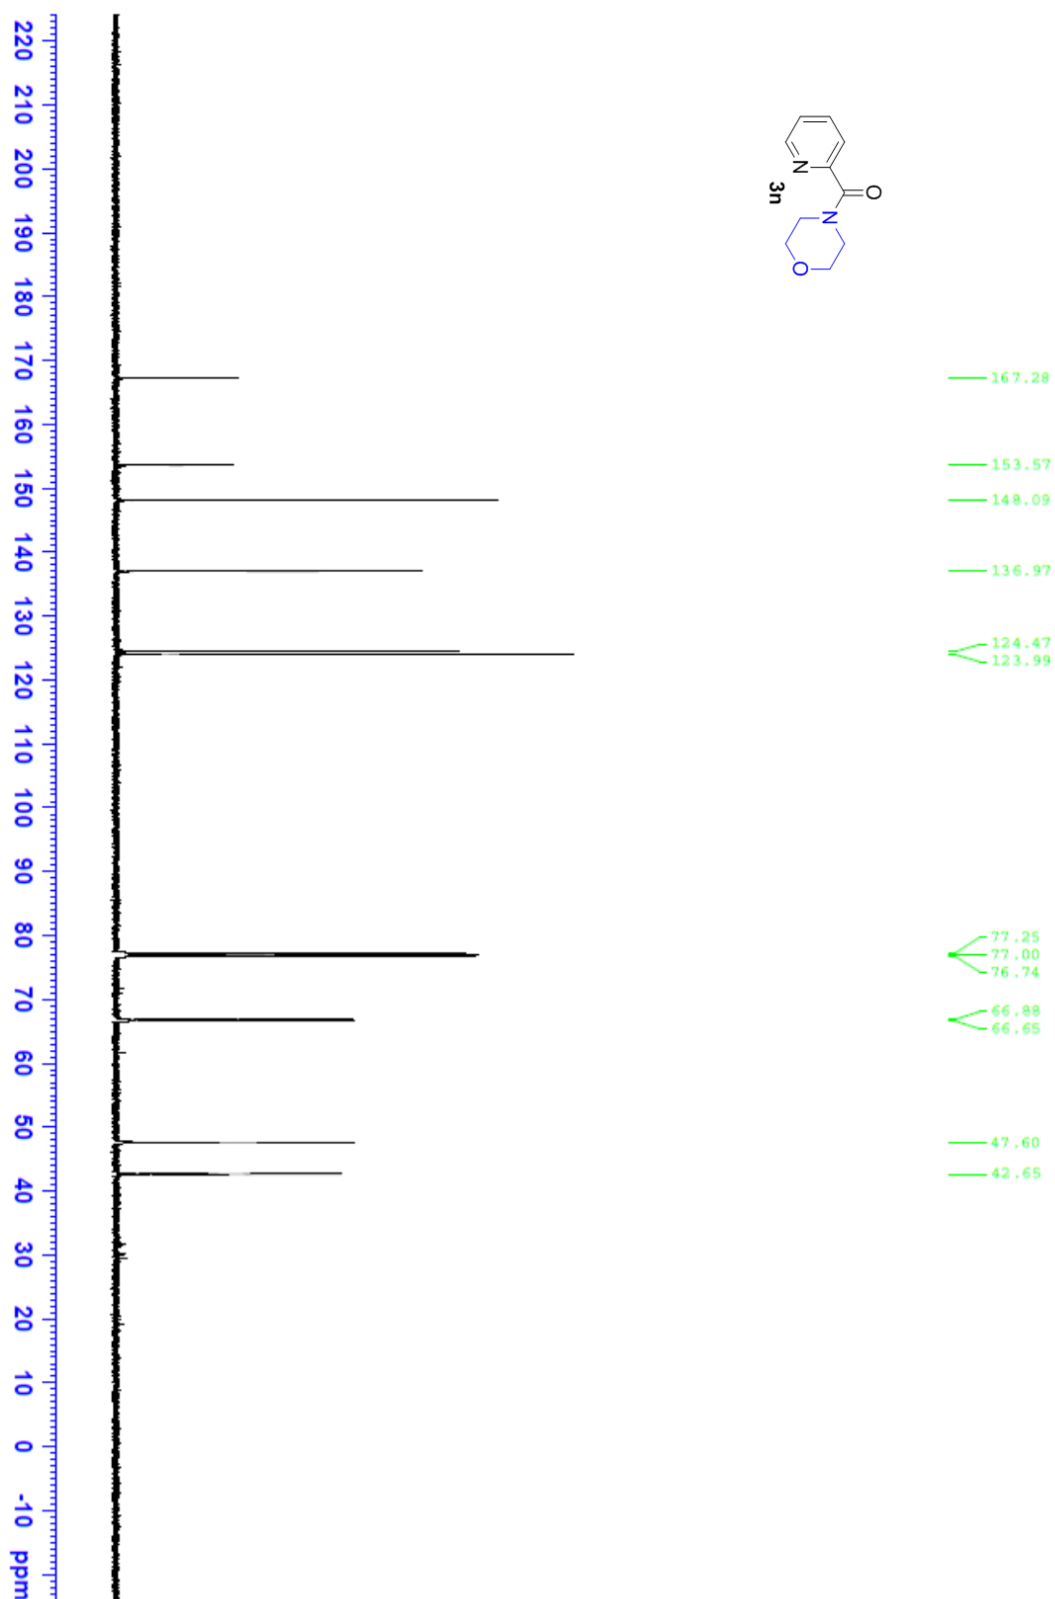

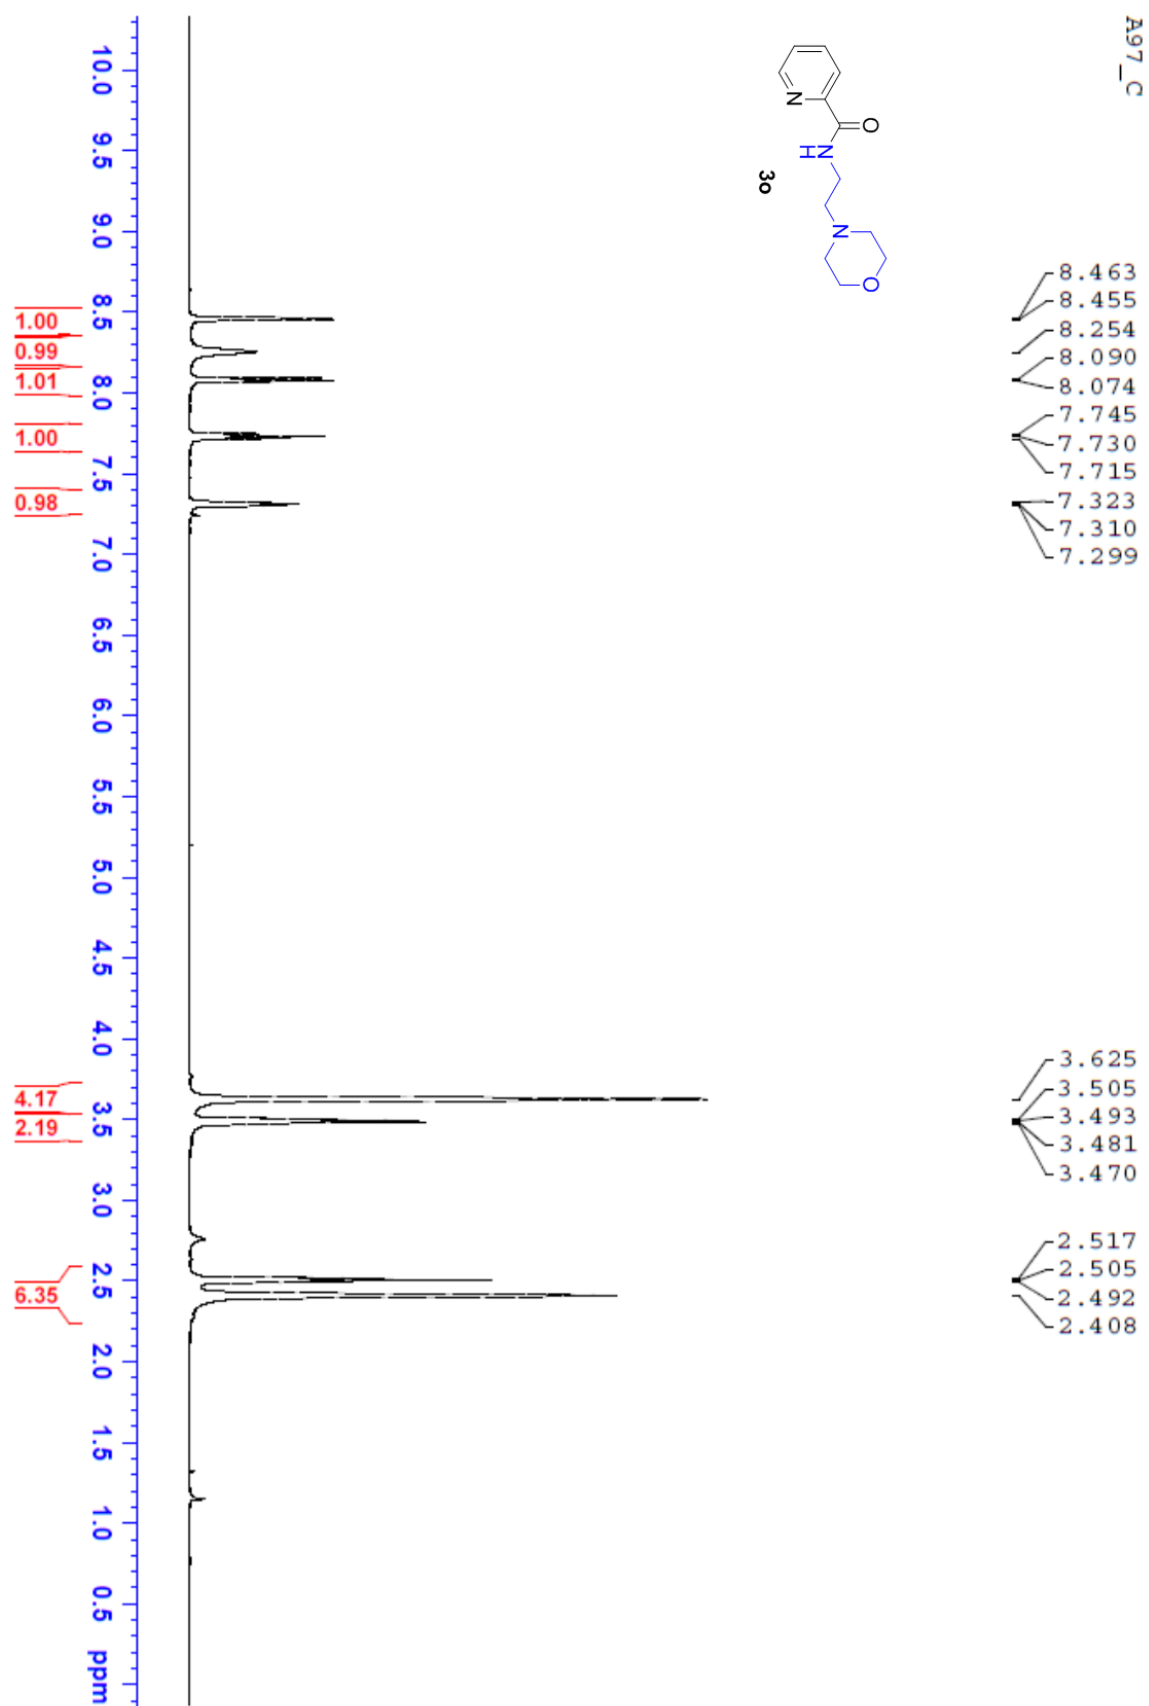

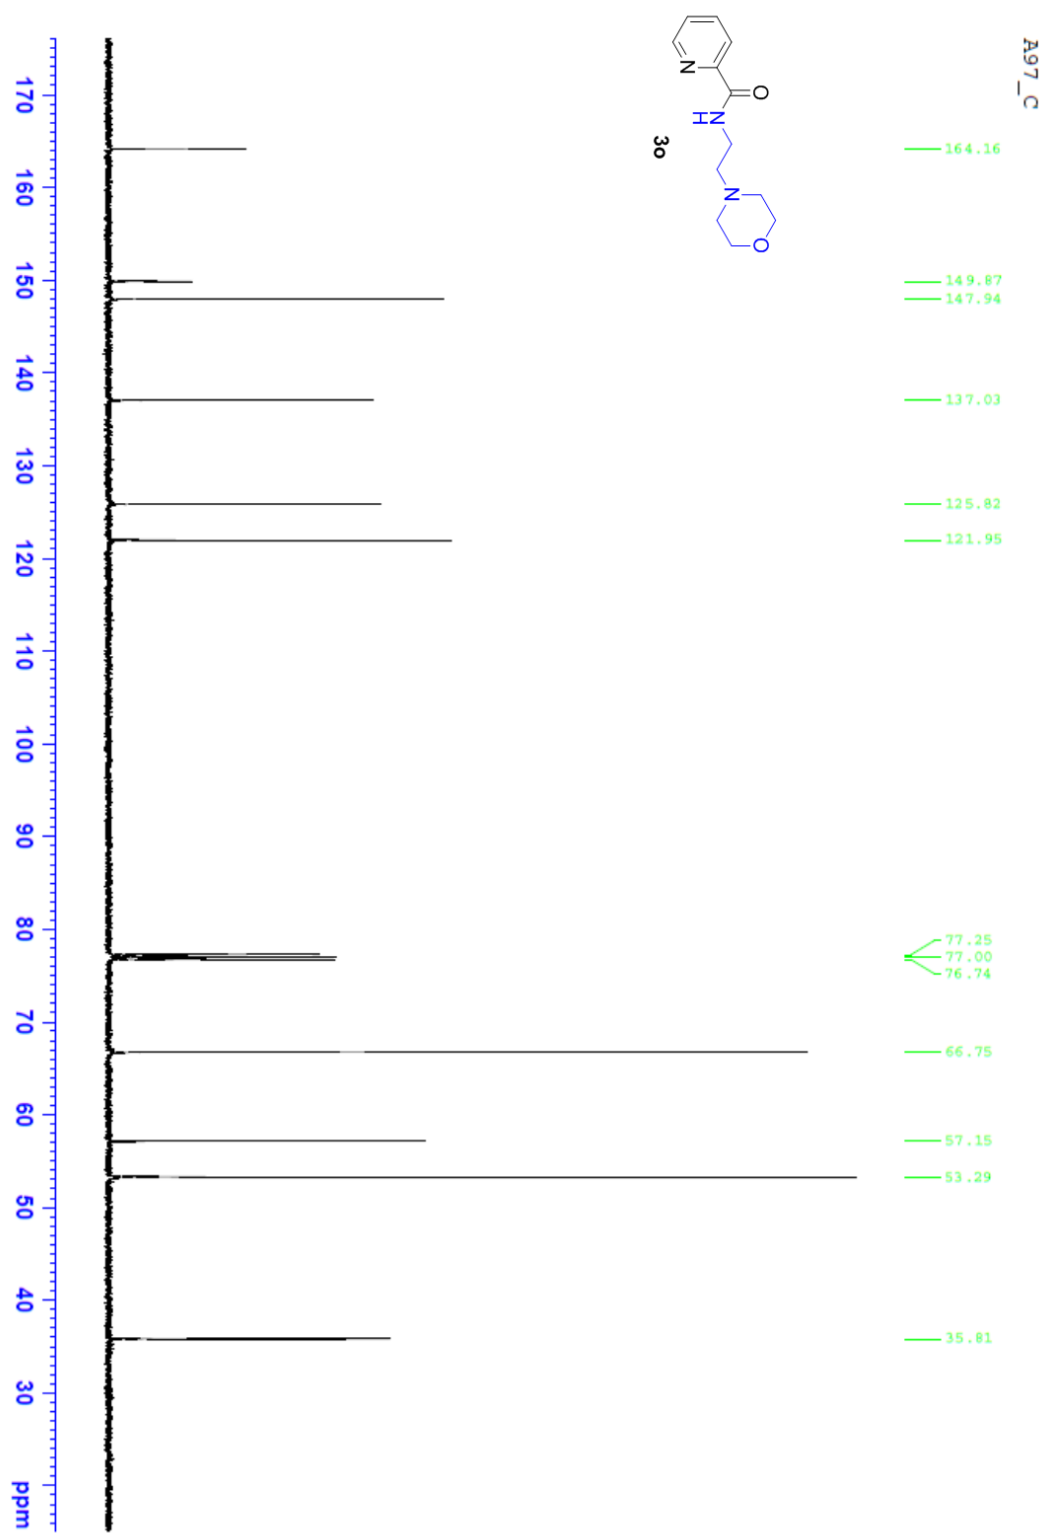

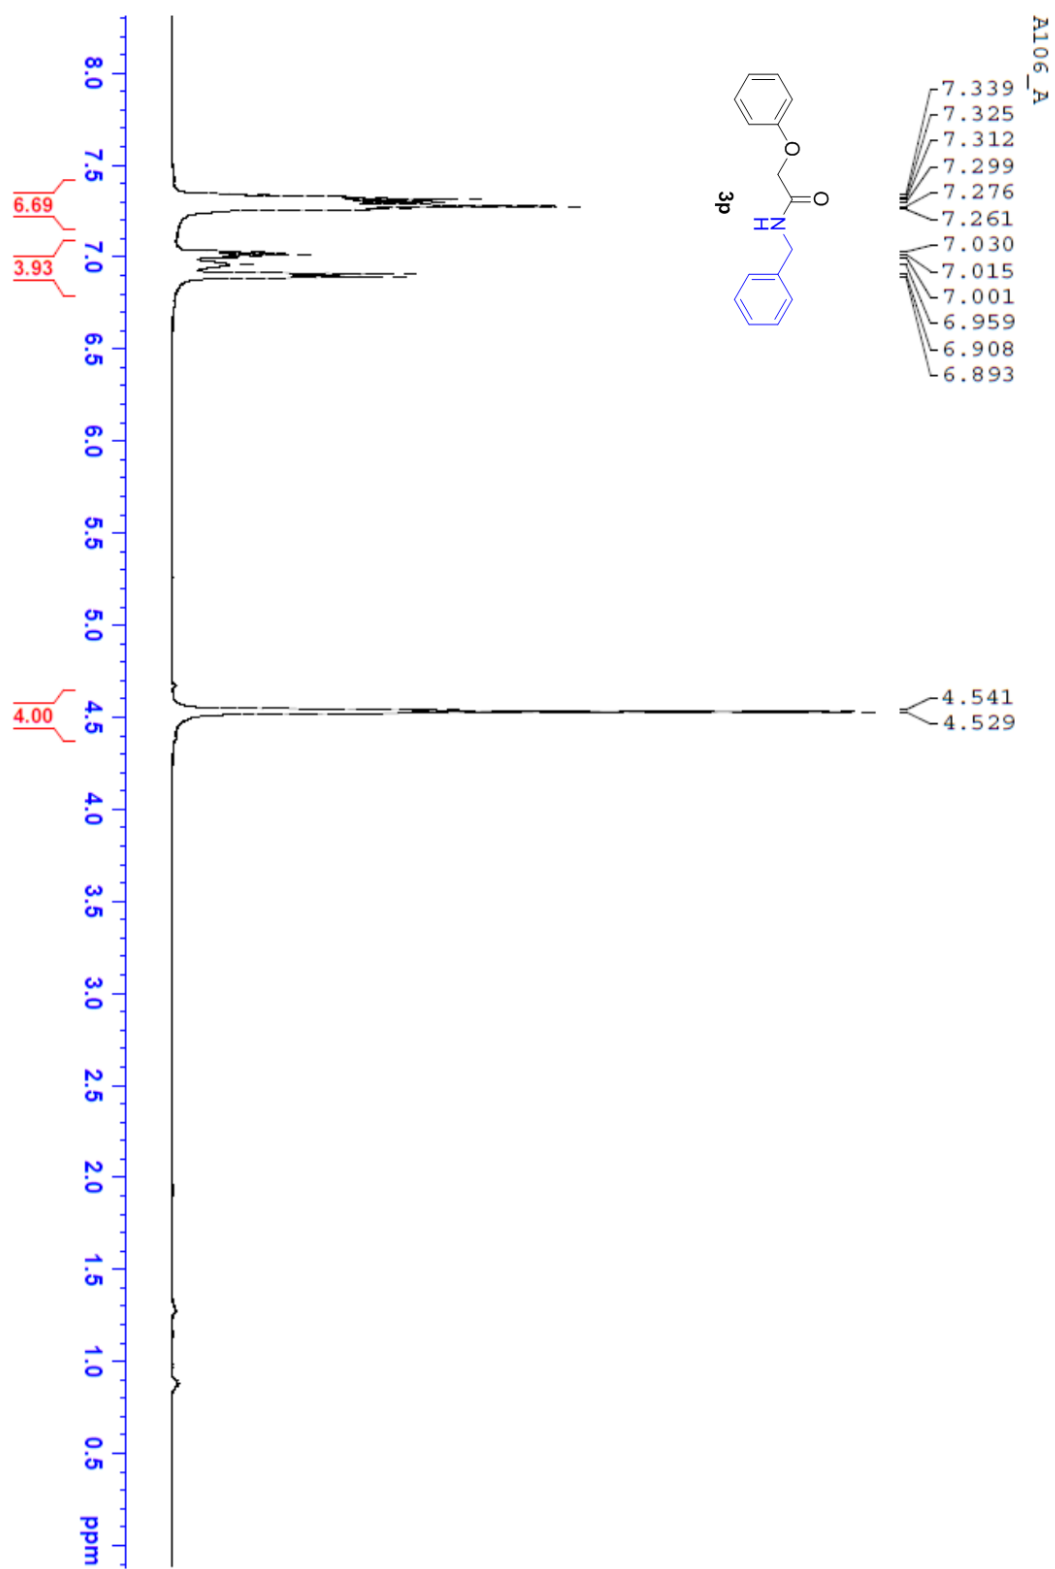

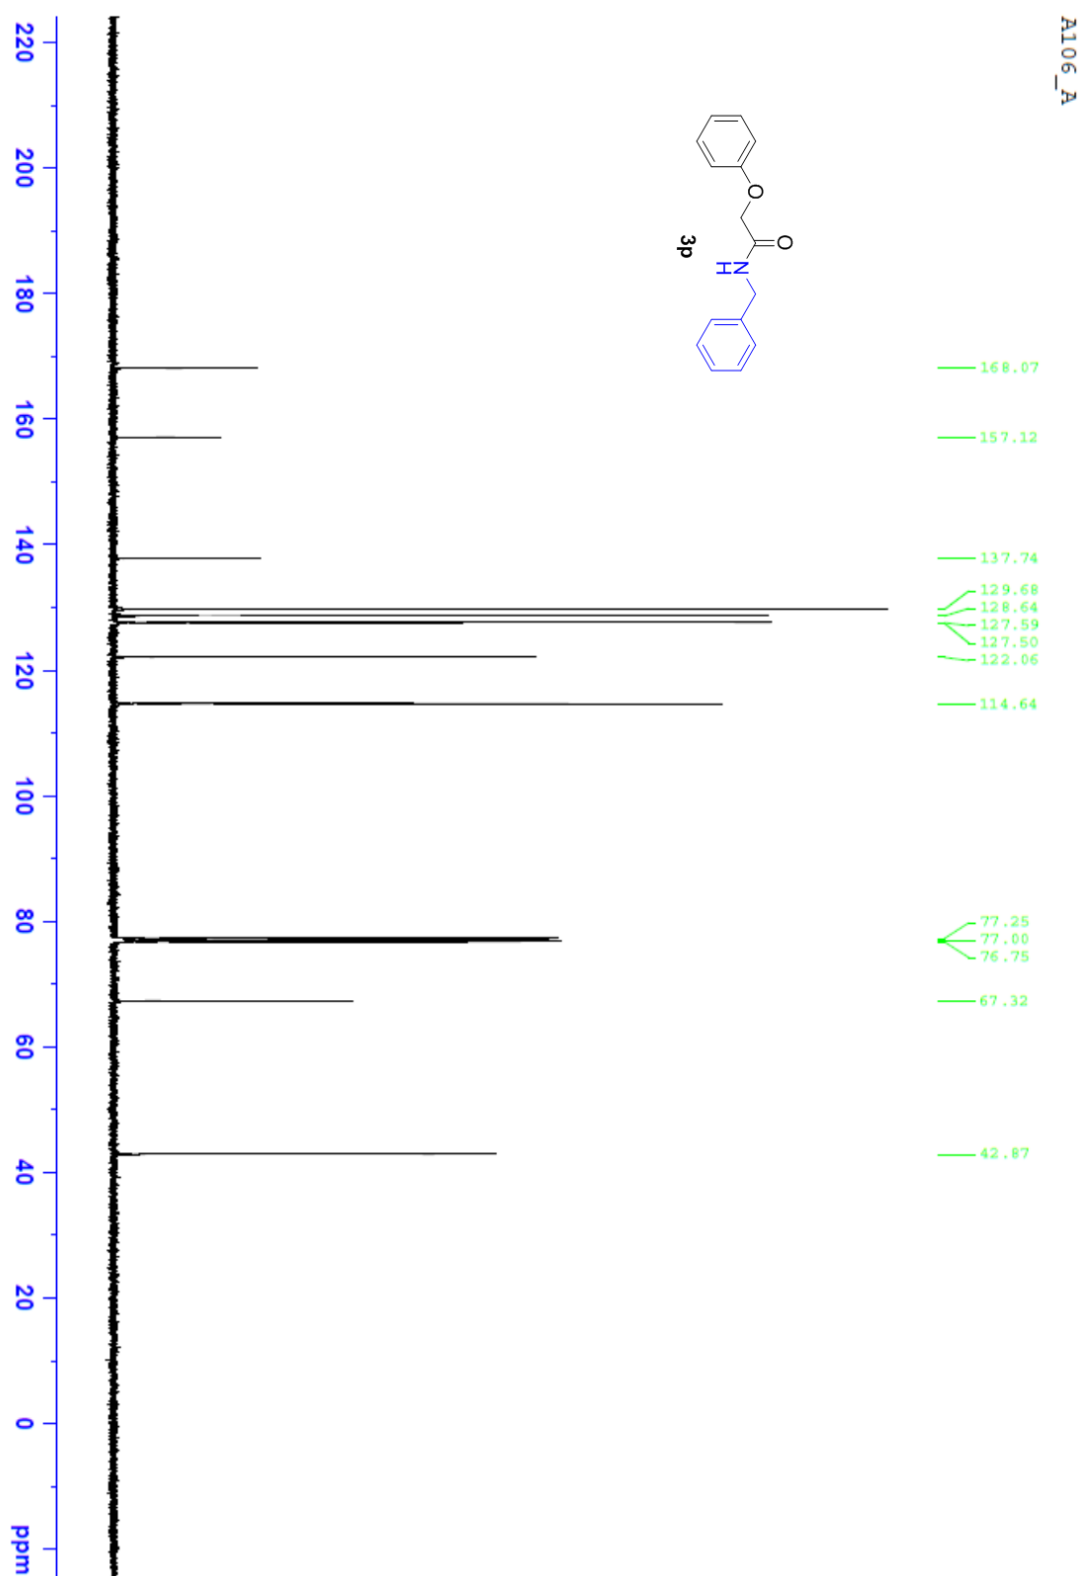

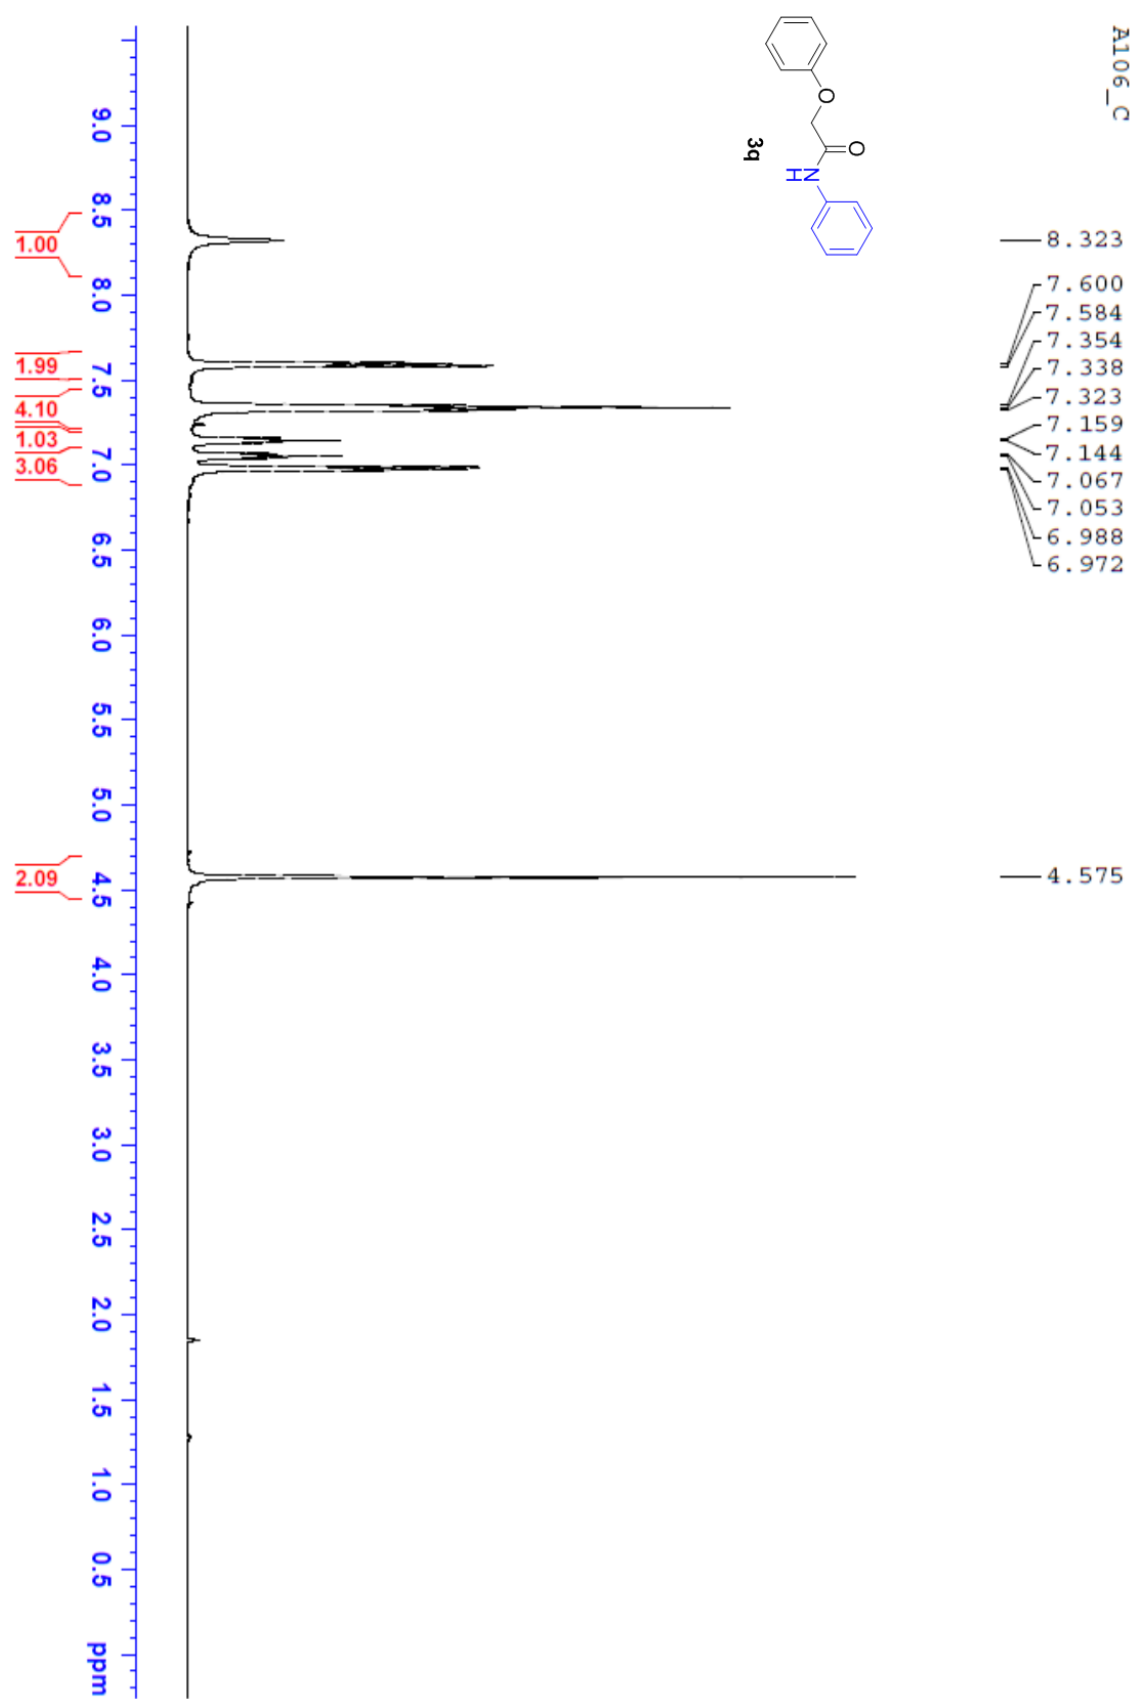

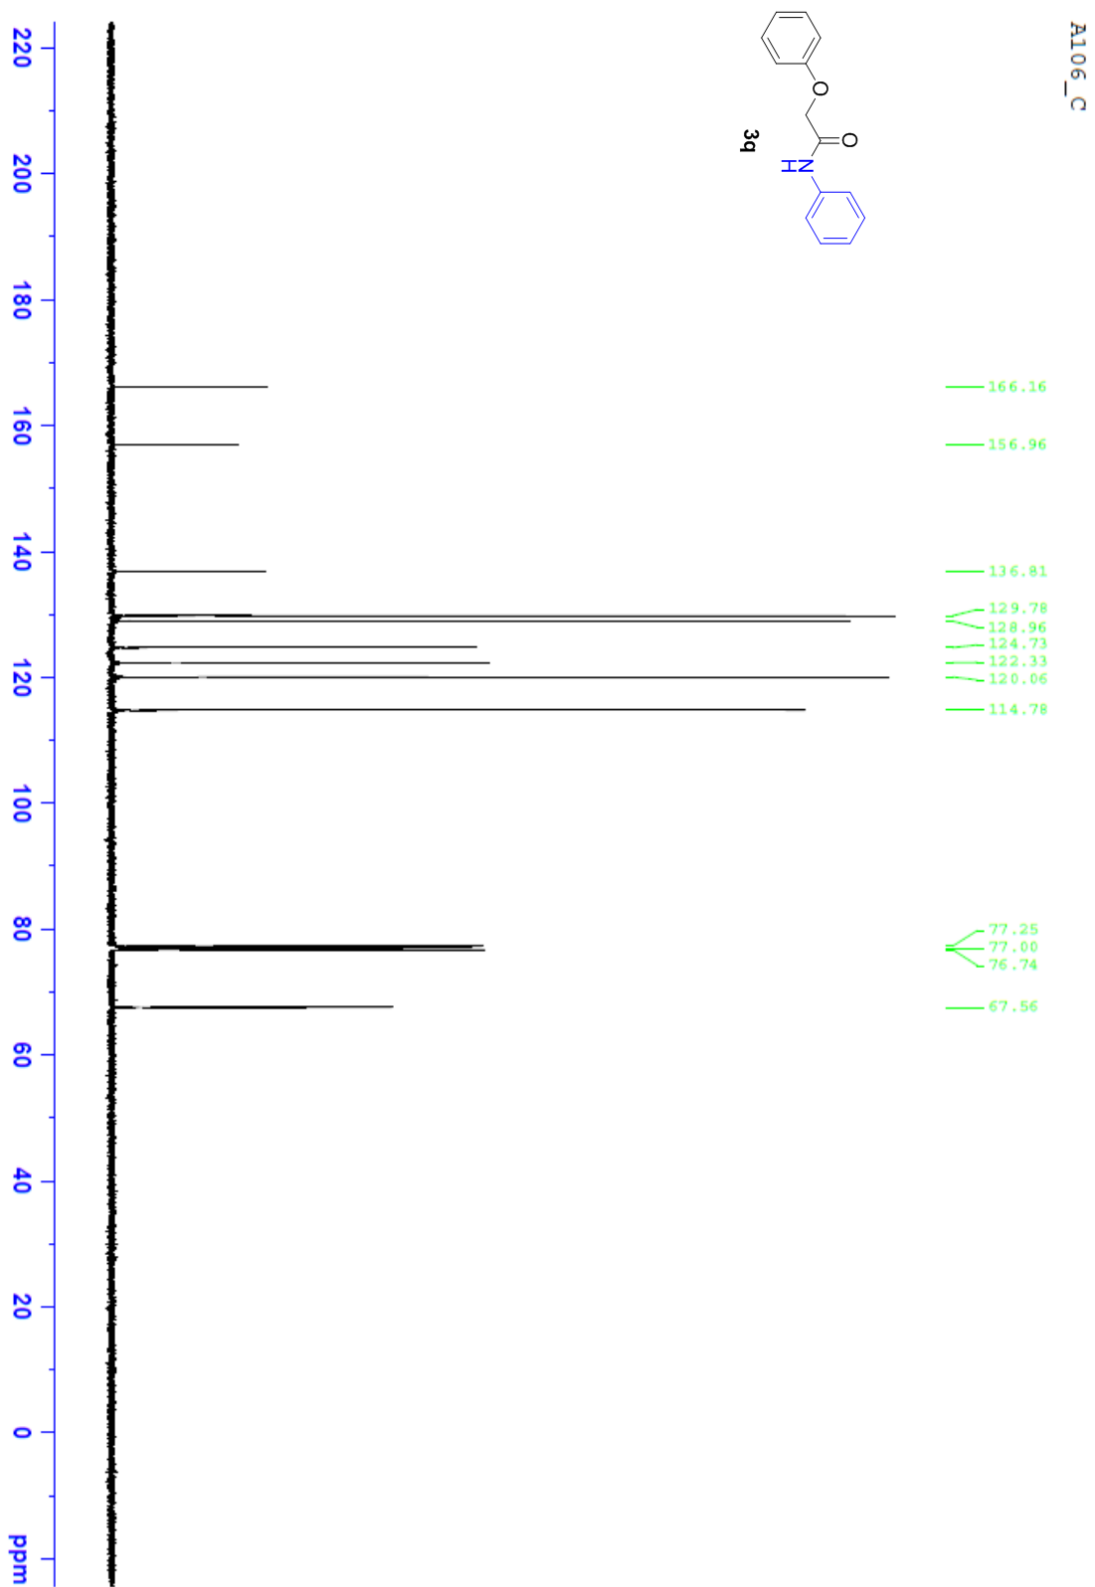

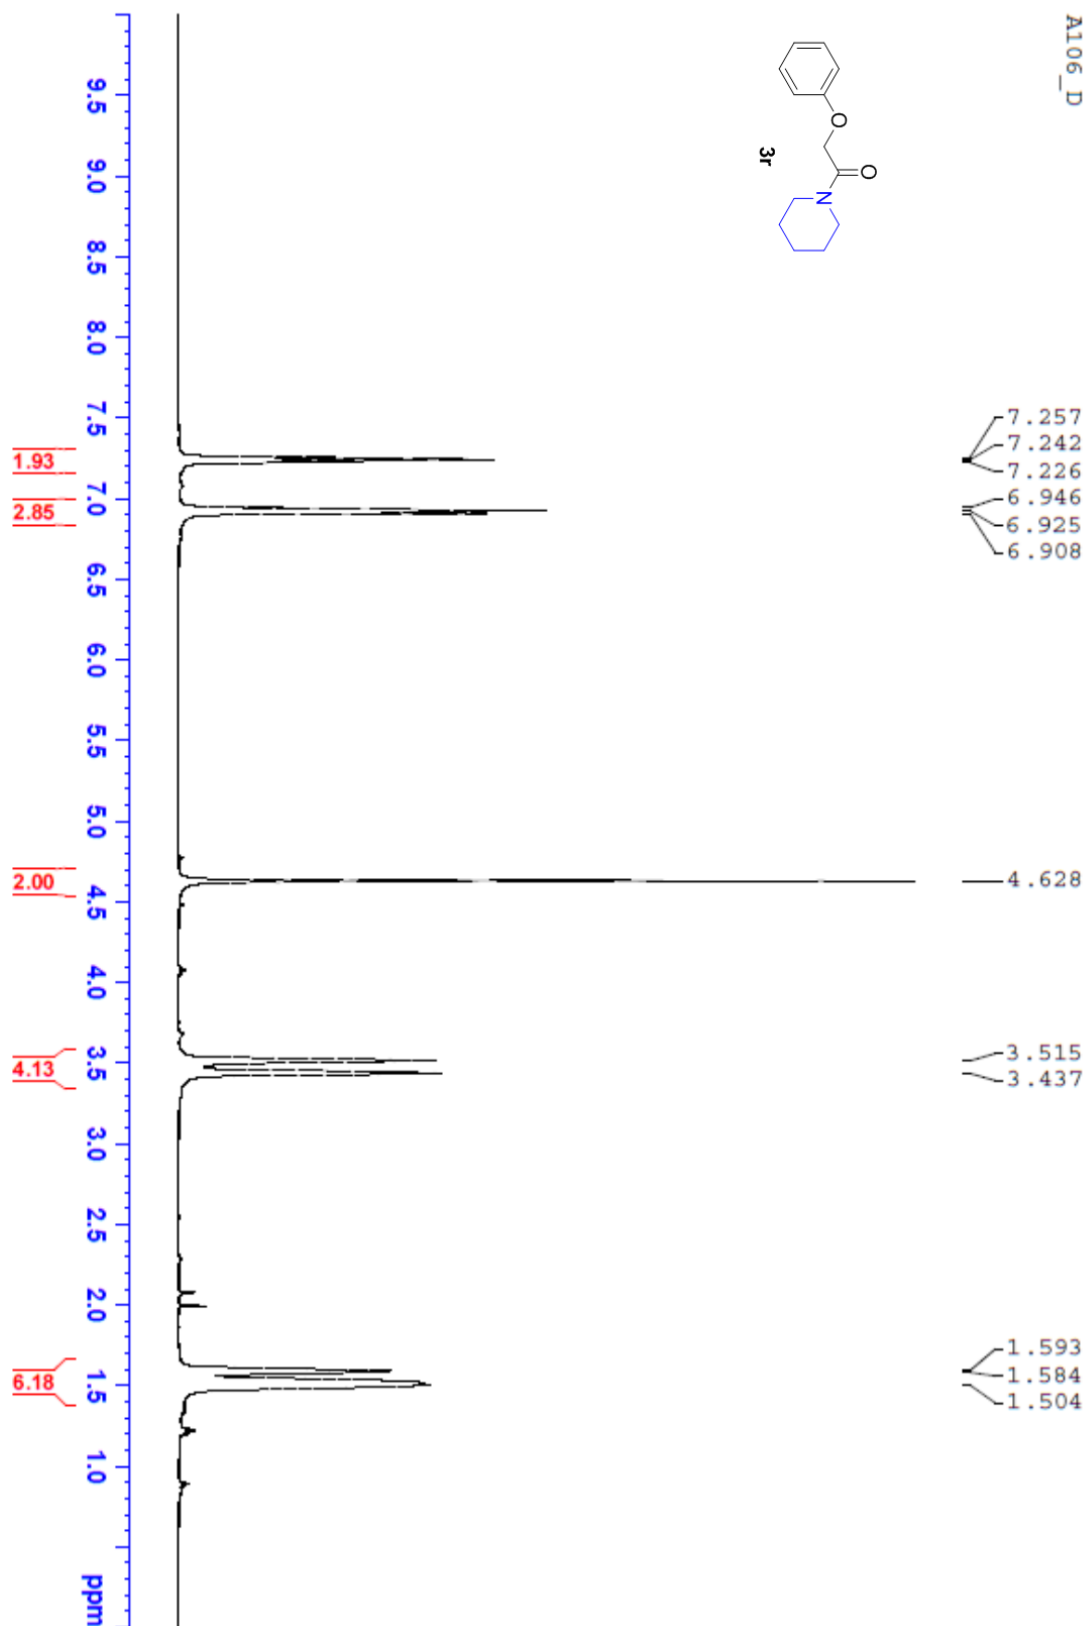

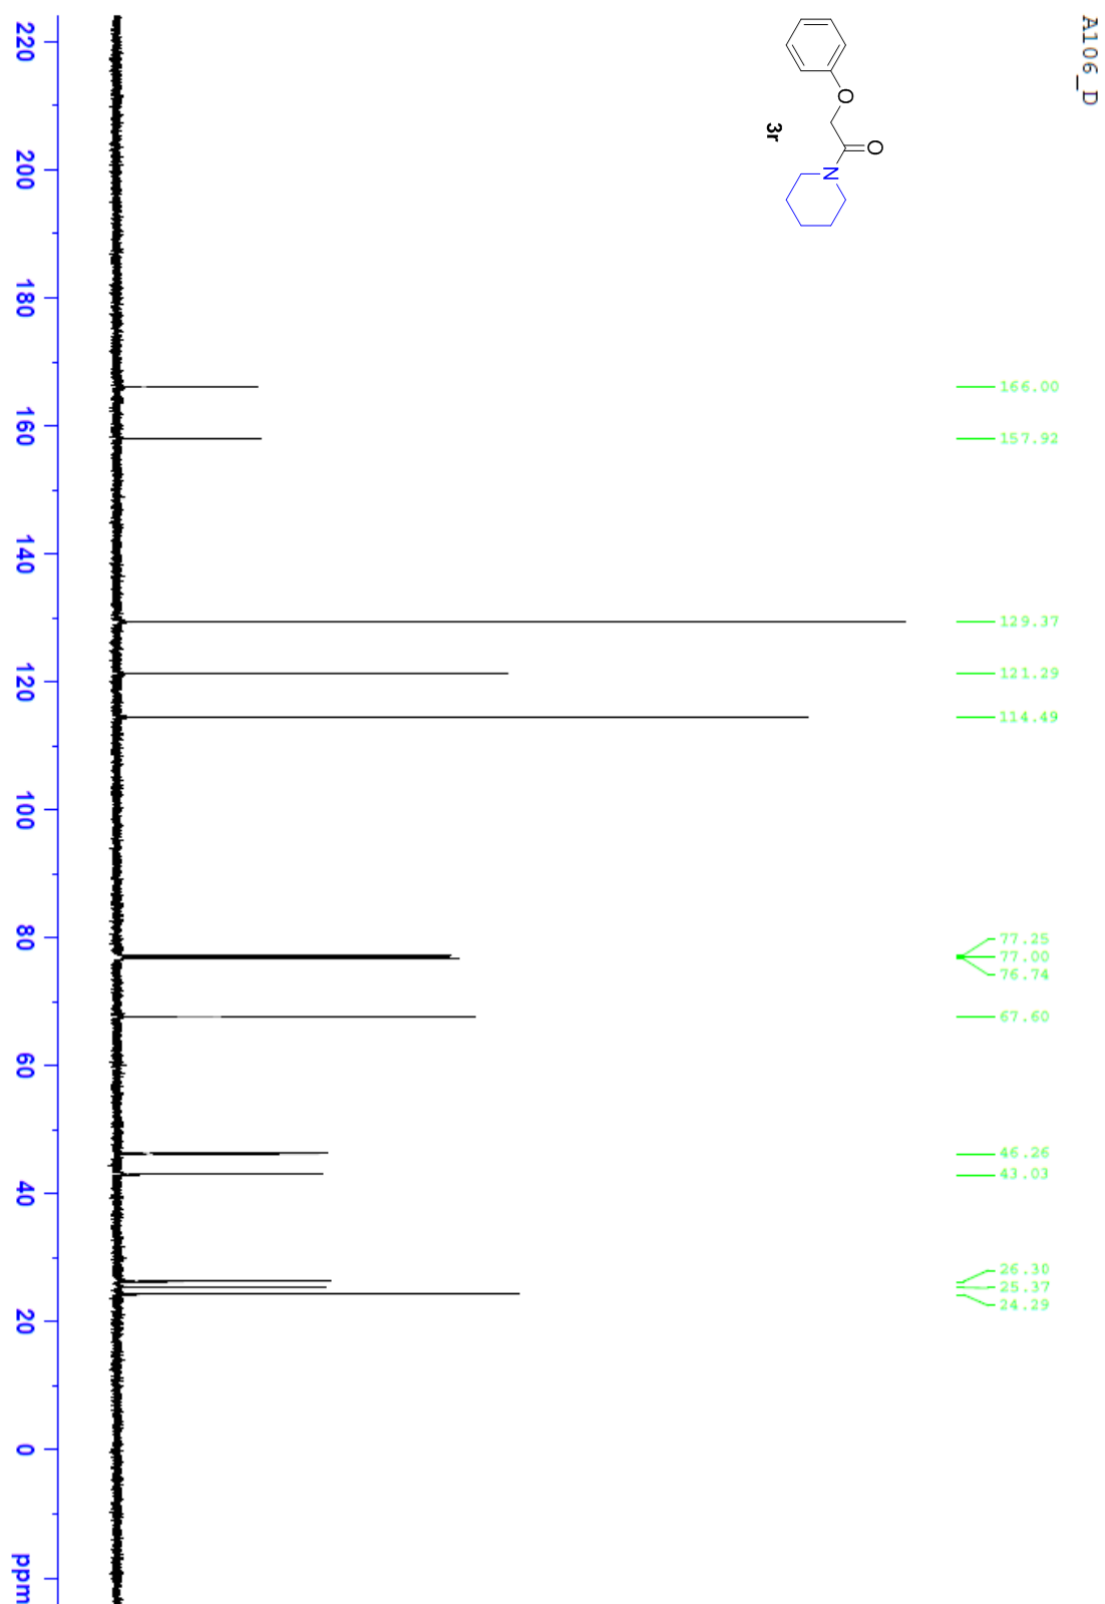

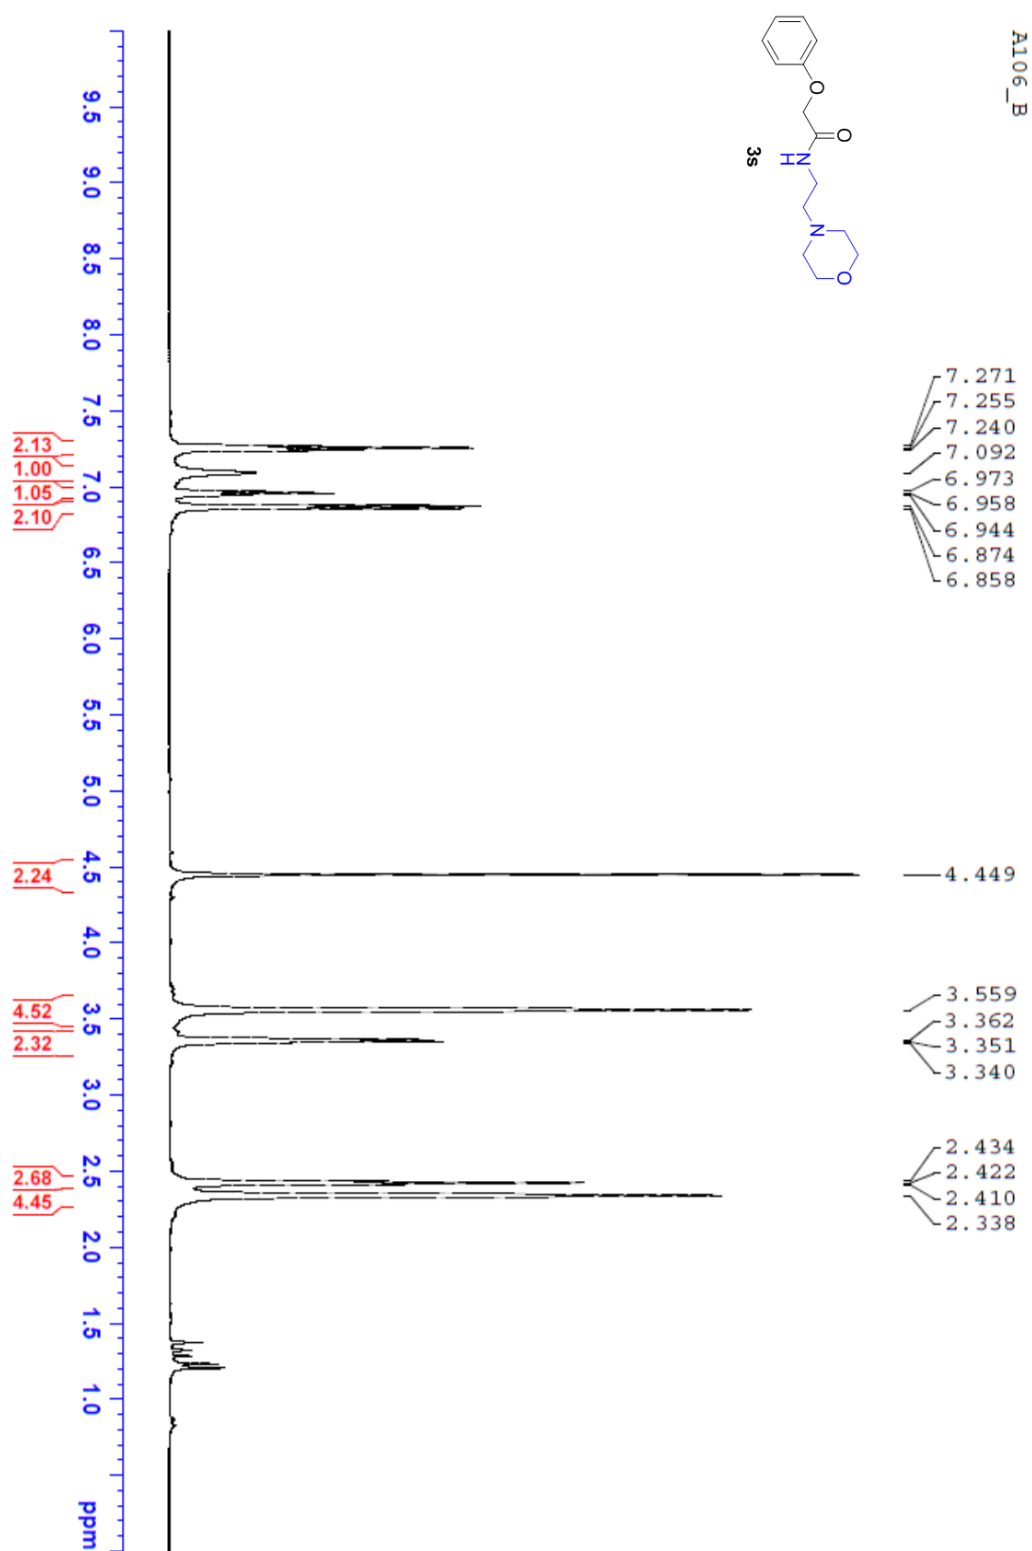

A106\_B

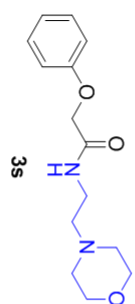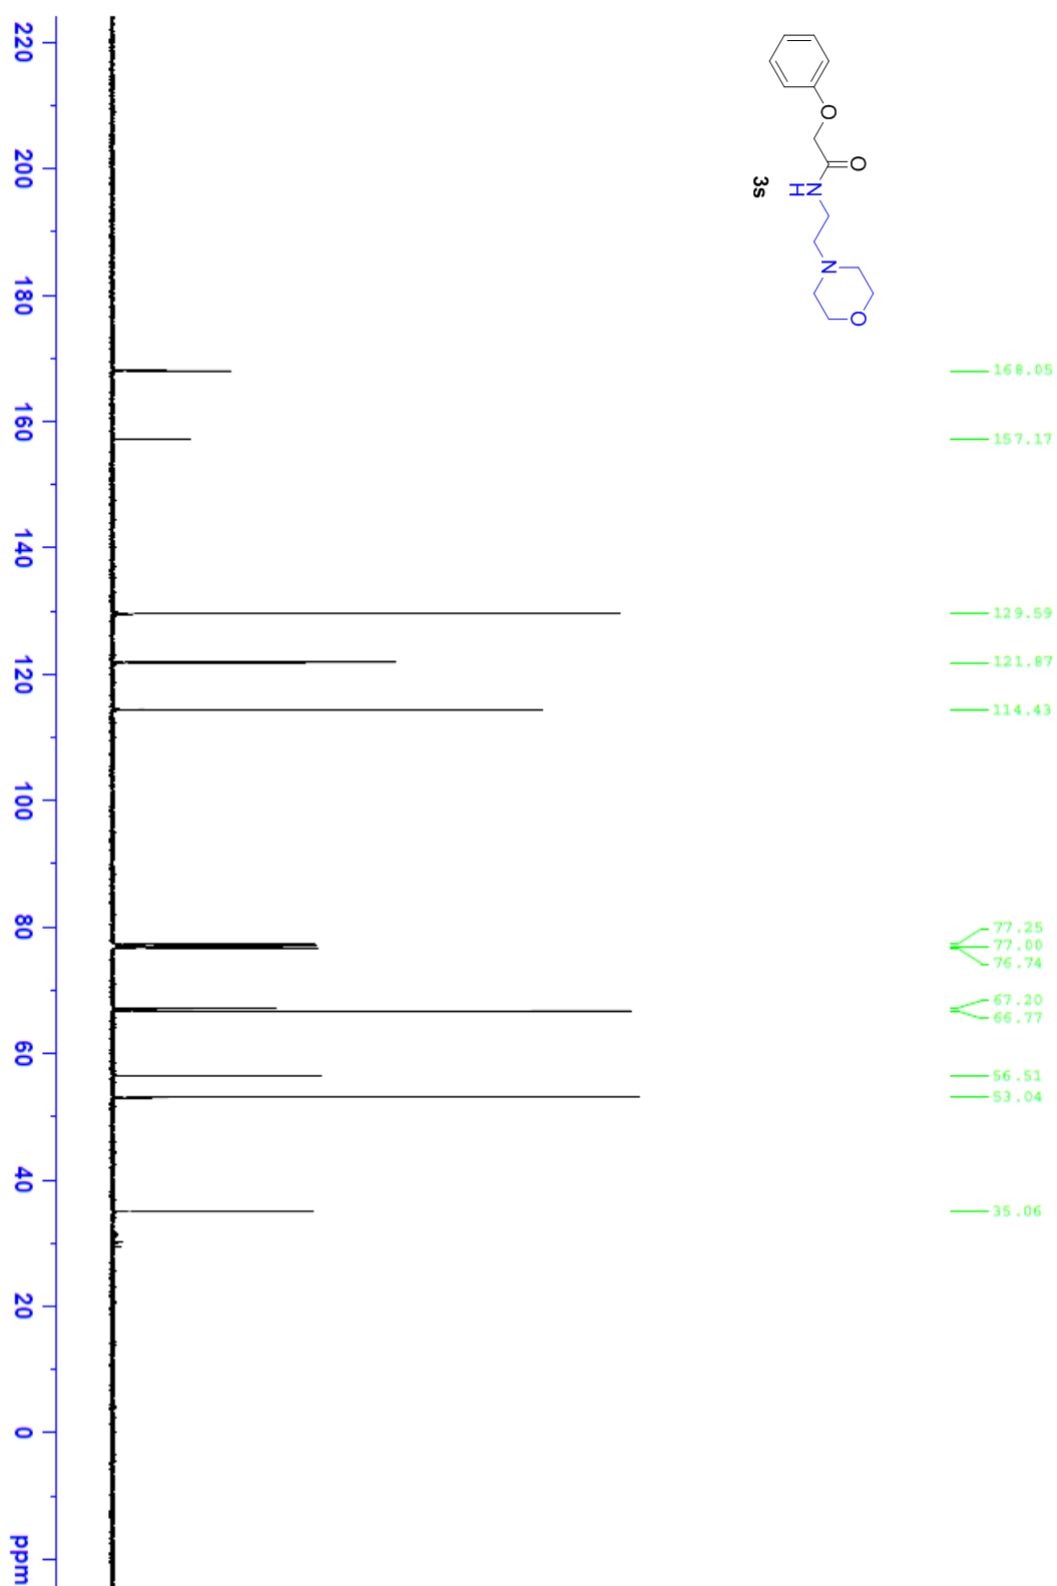

Jul102-2019-MALI 2B

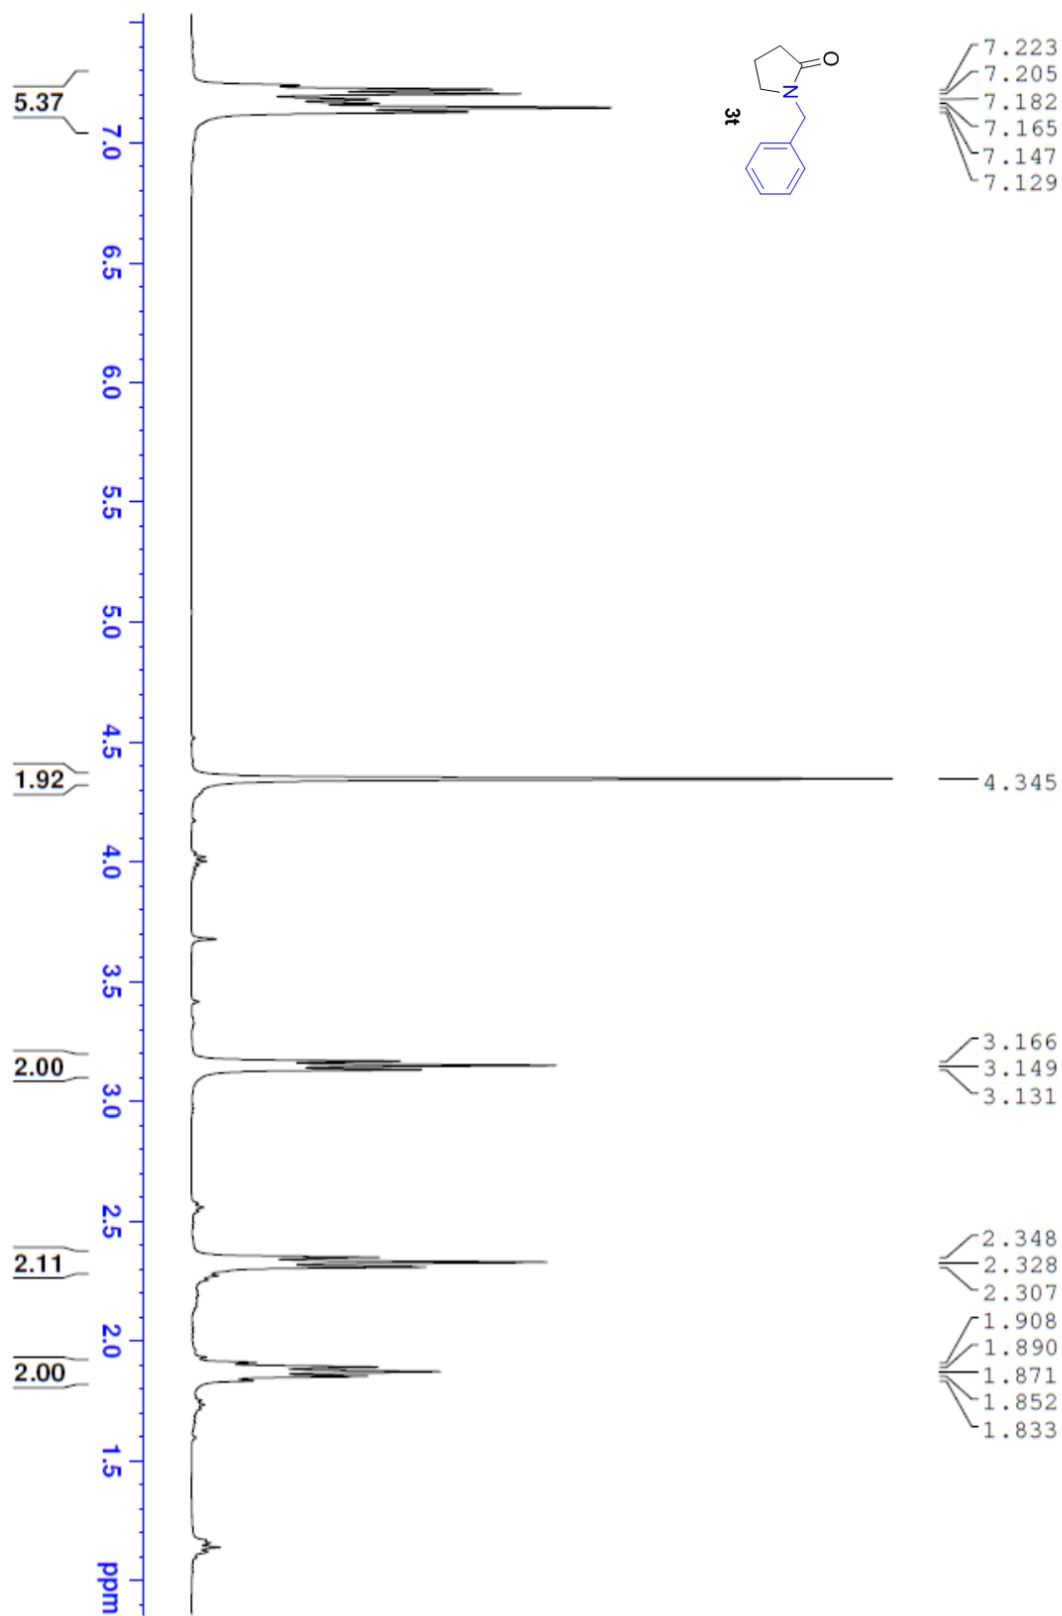

09-JAN-2020 1 FC C13

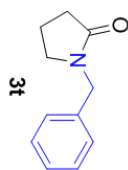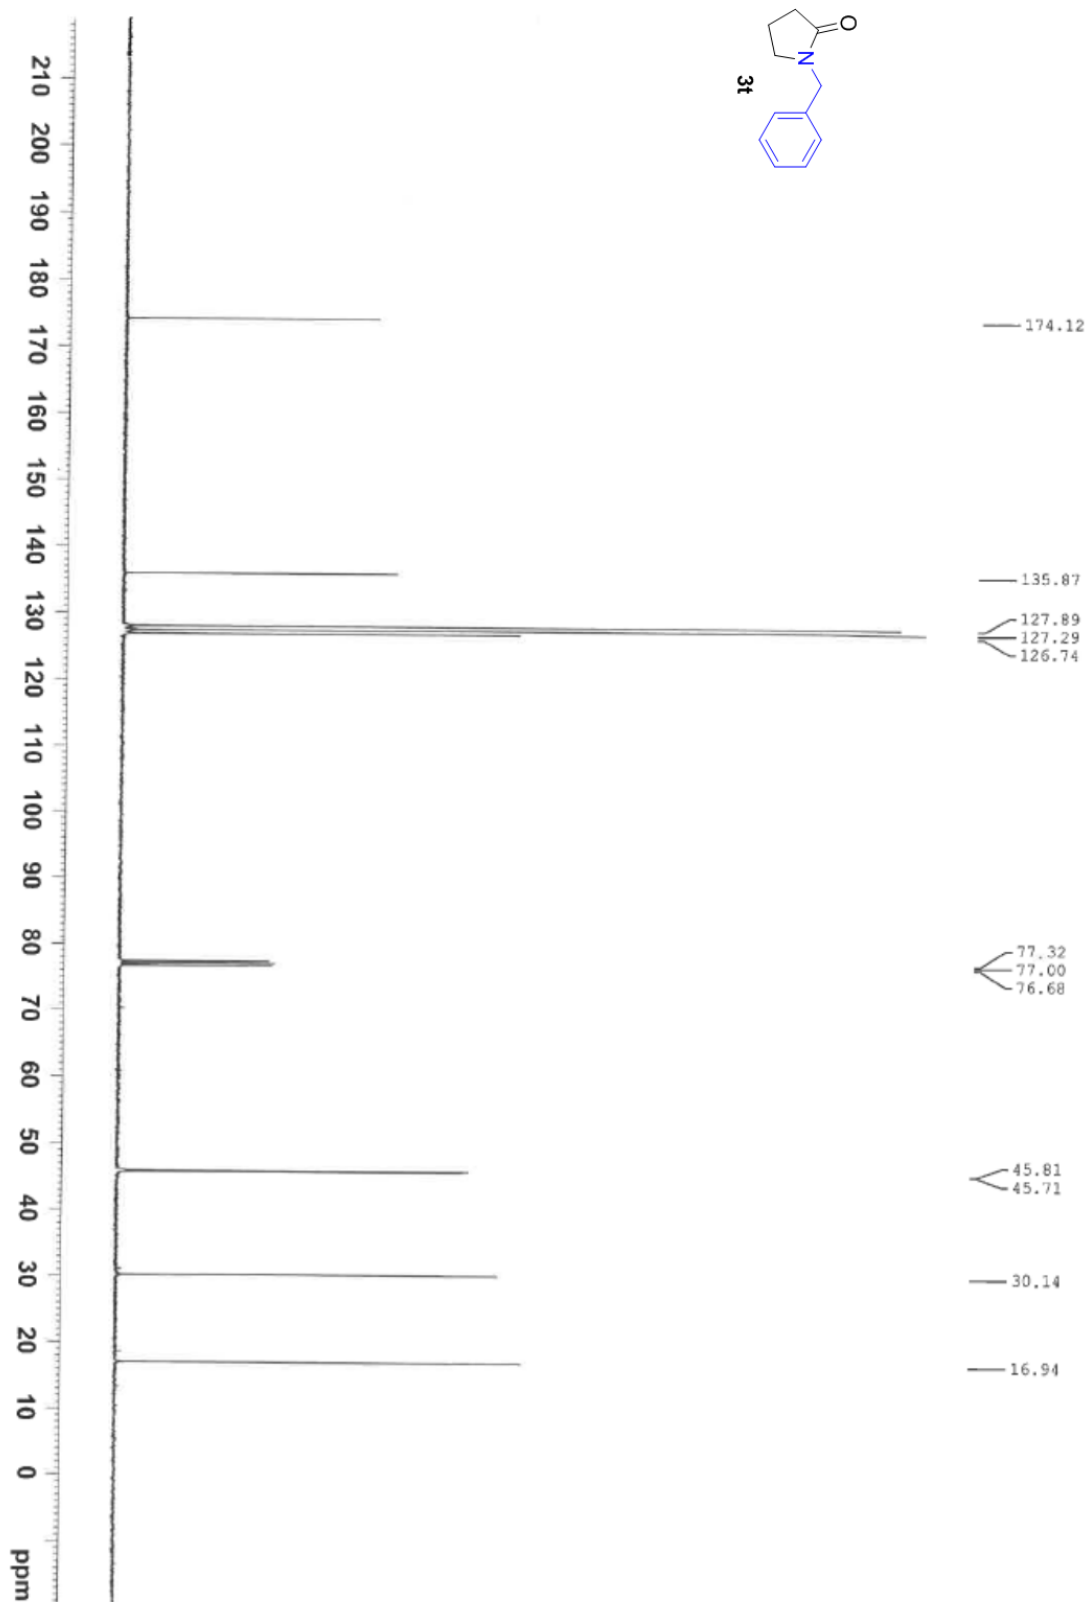

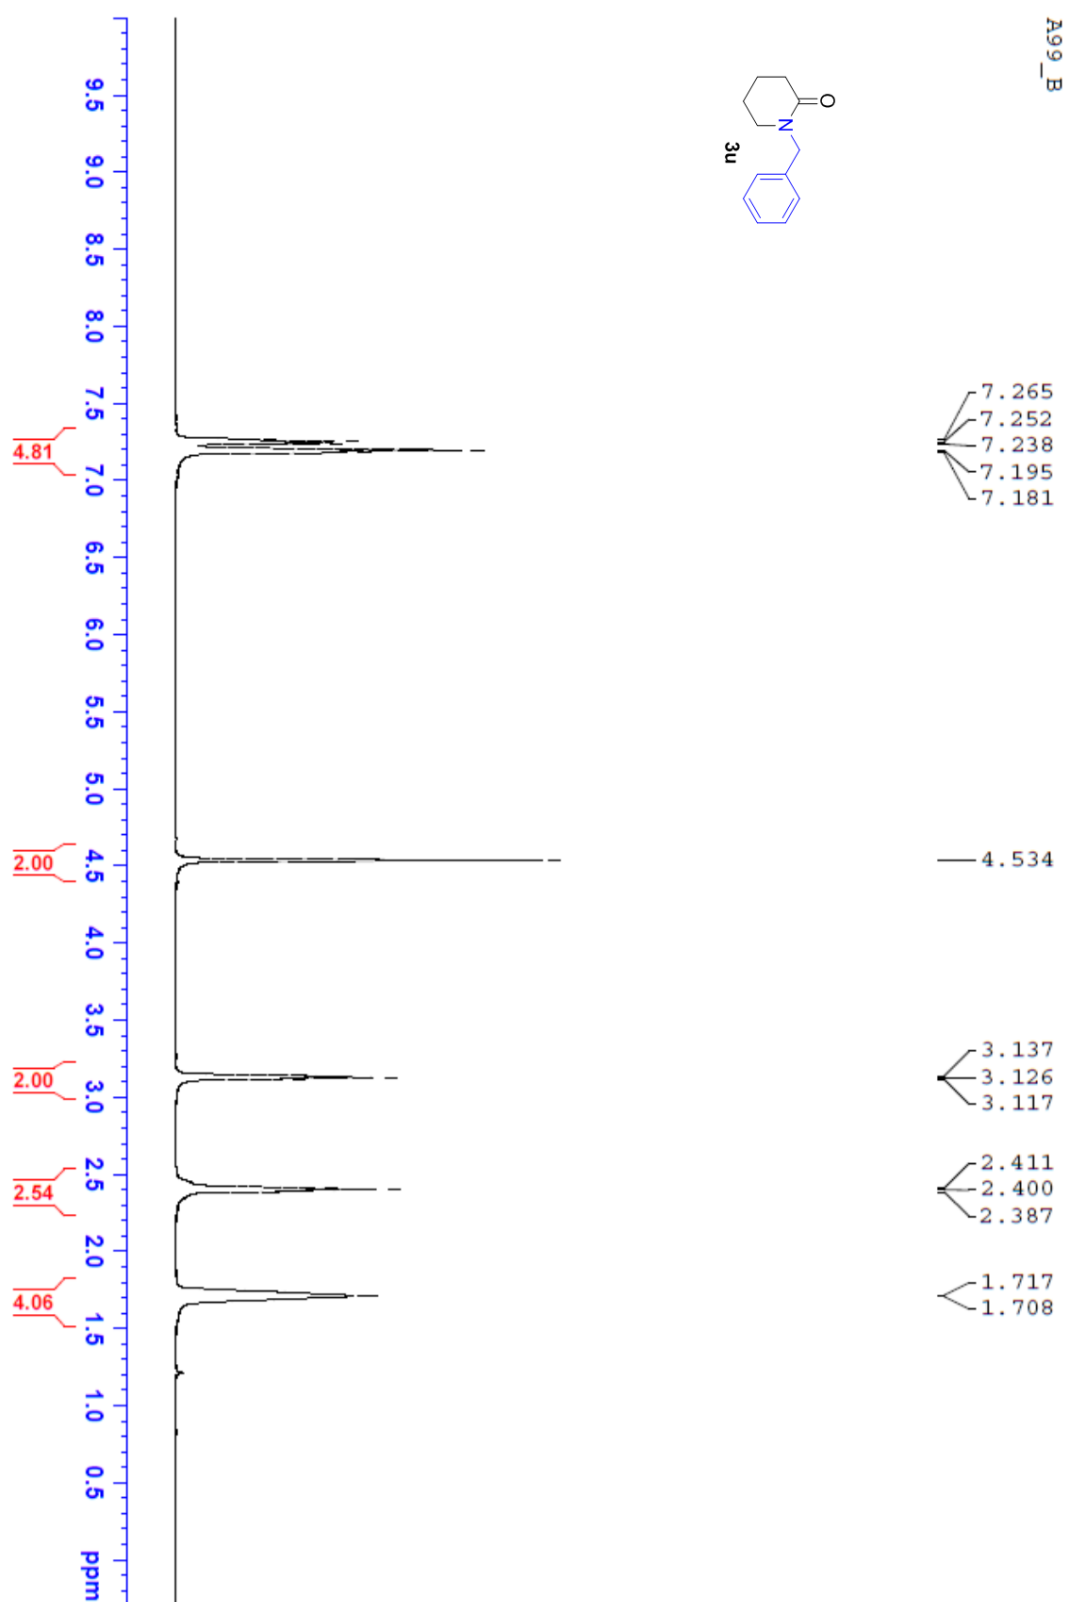

A99\_B

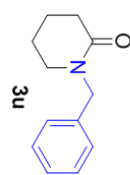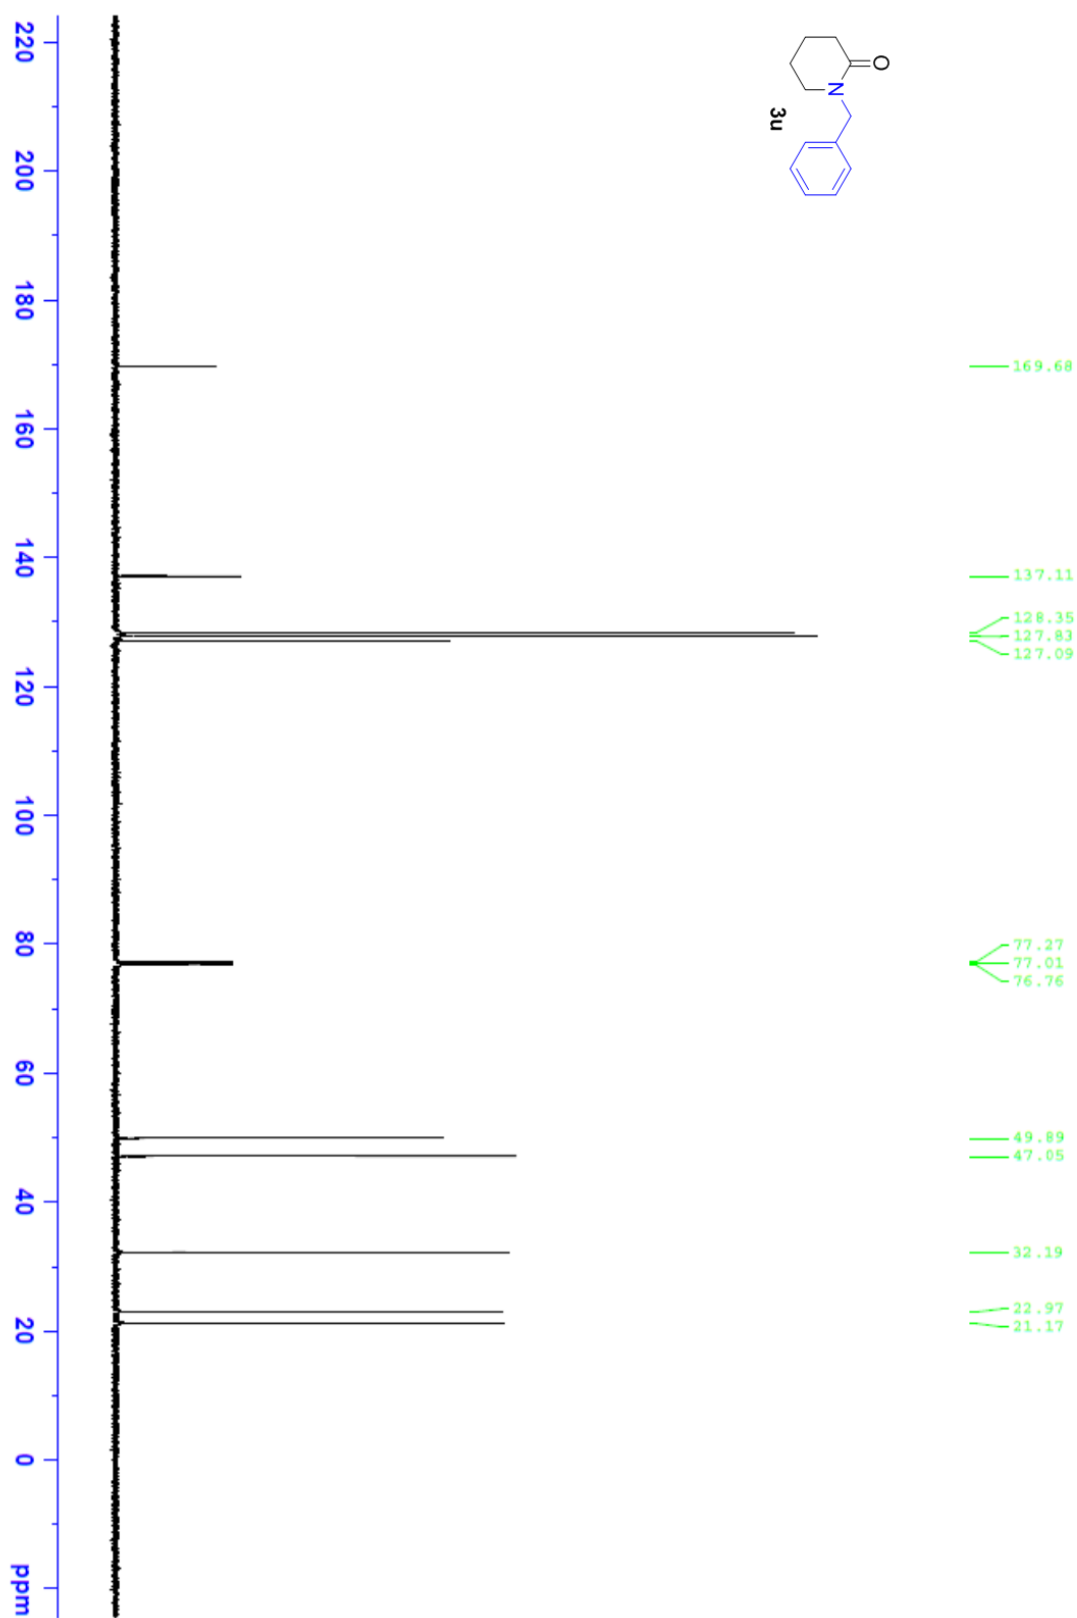

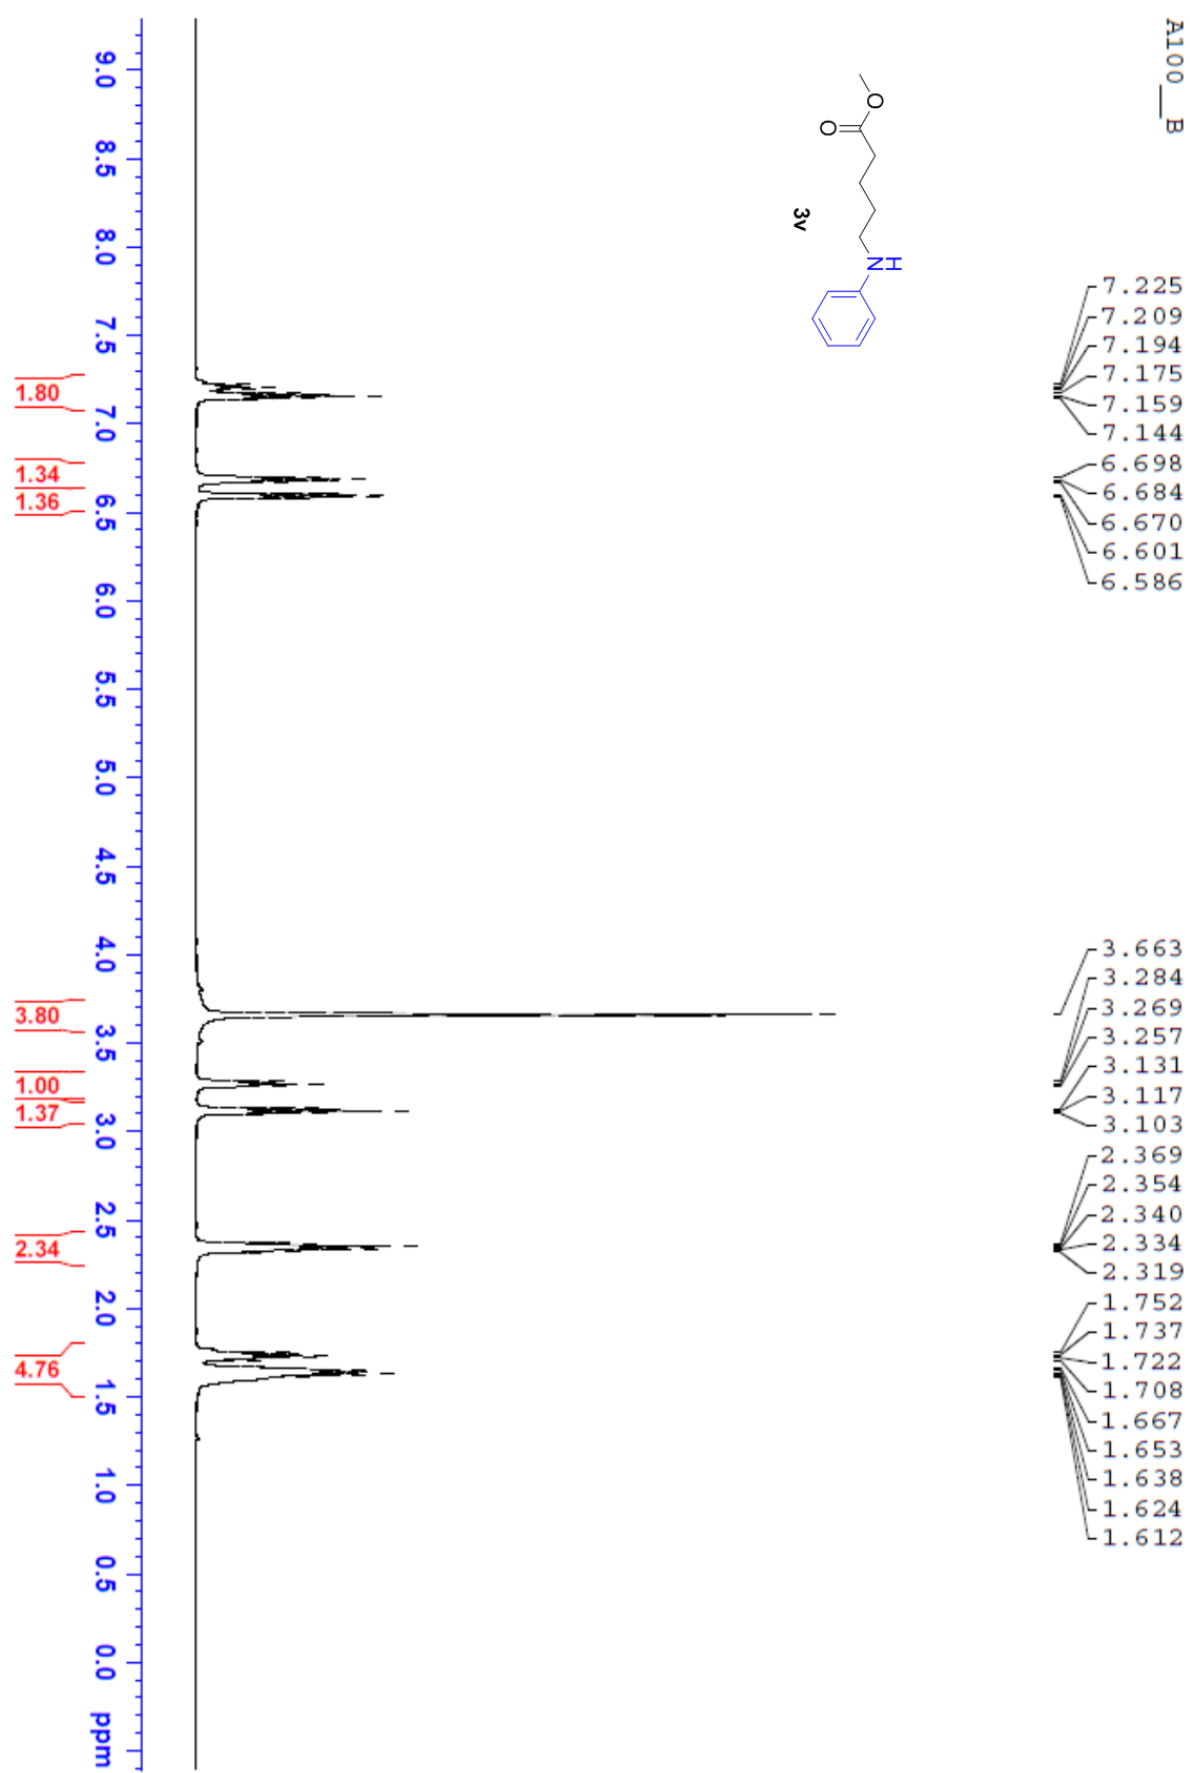

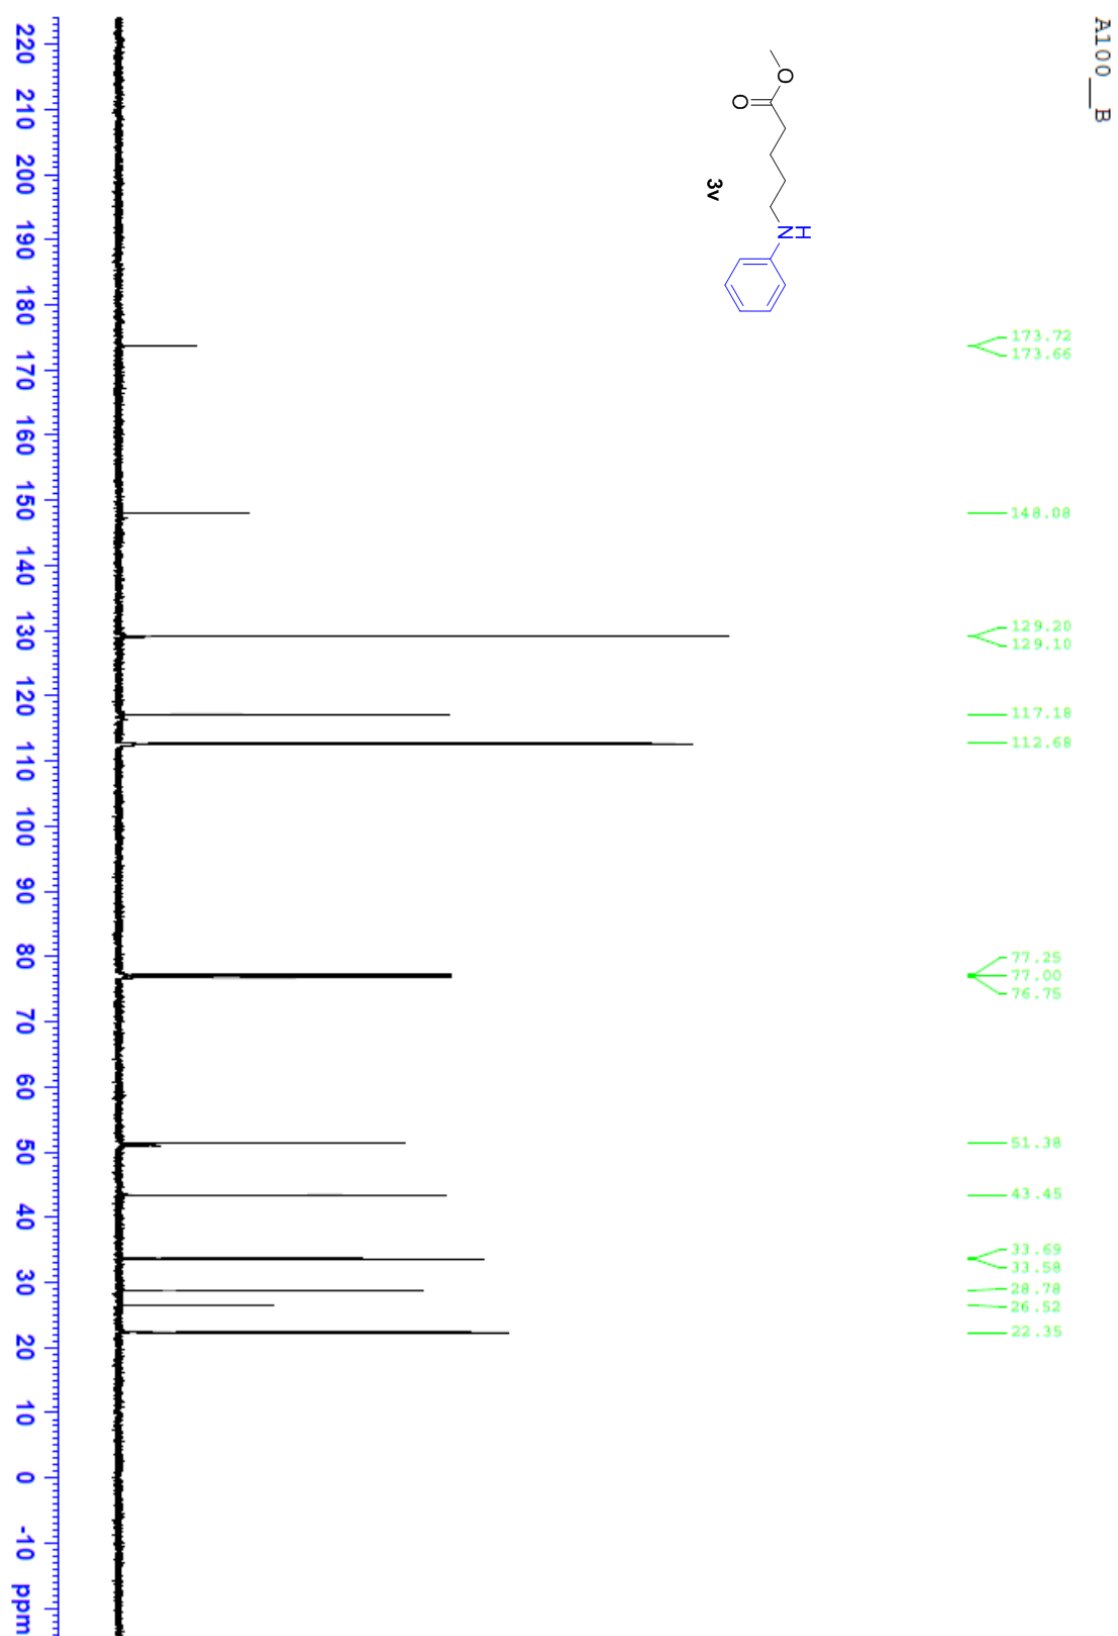

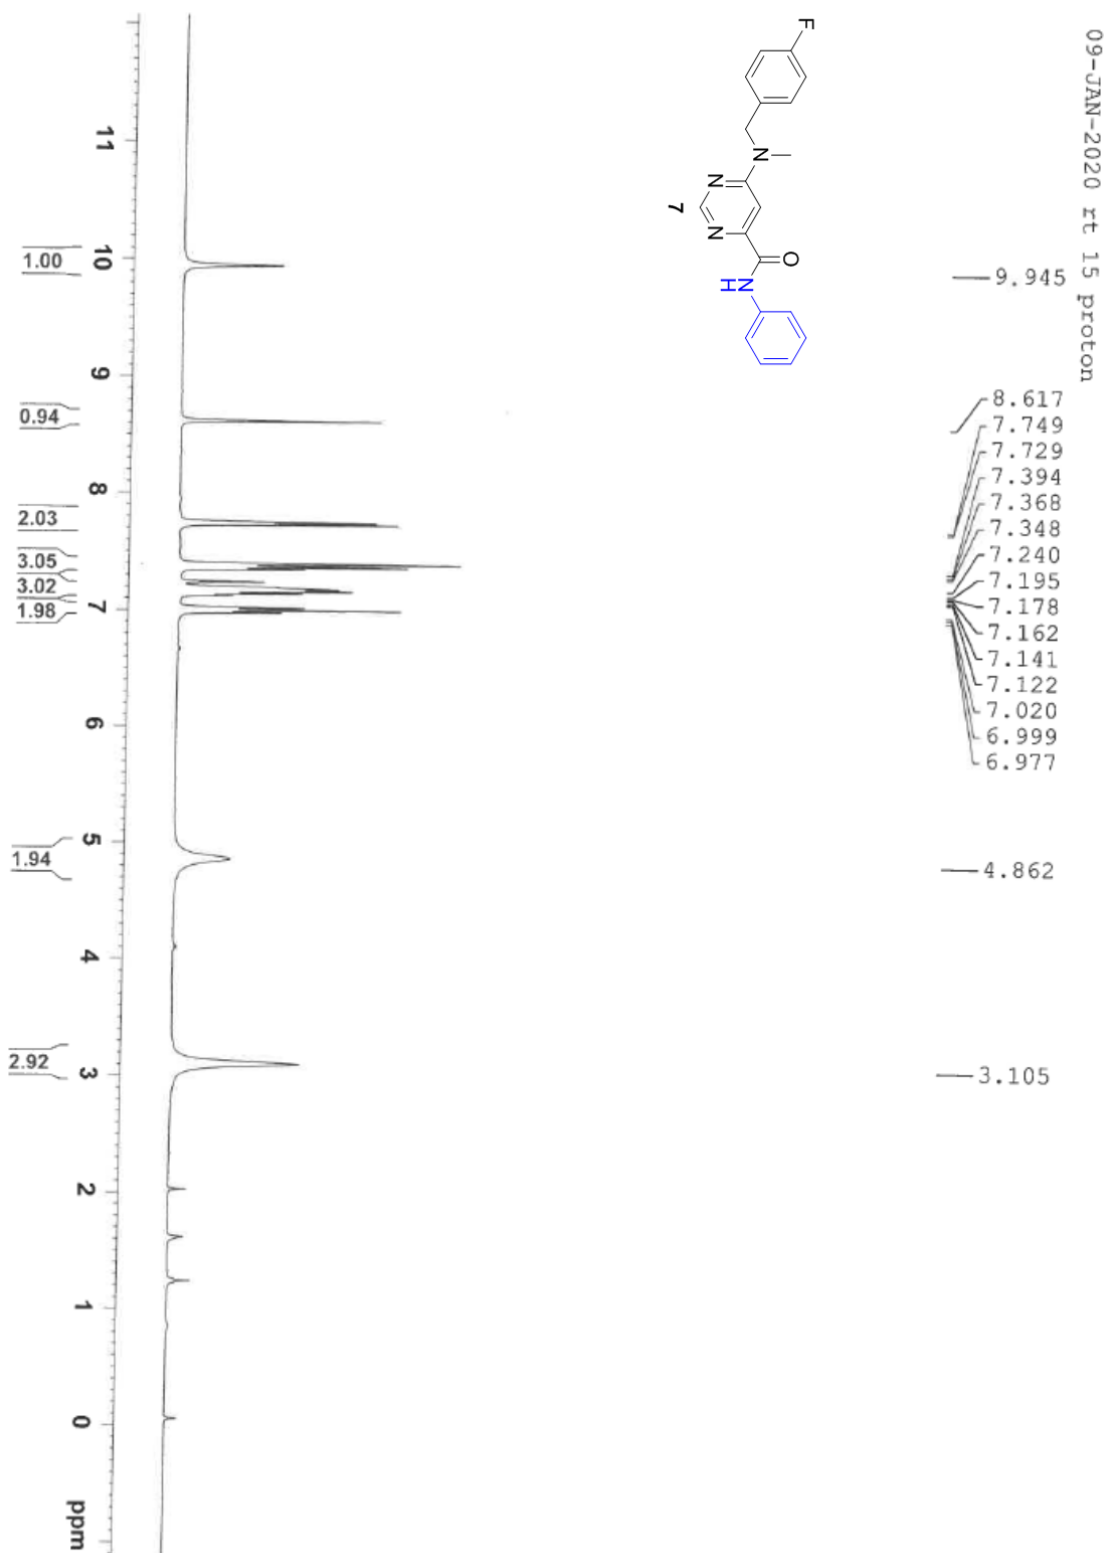

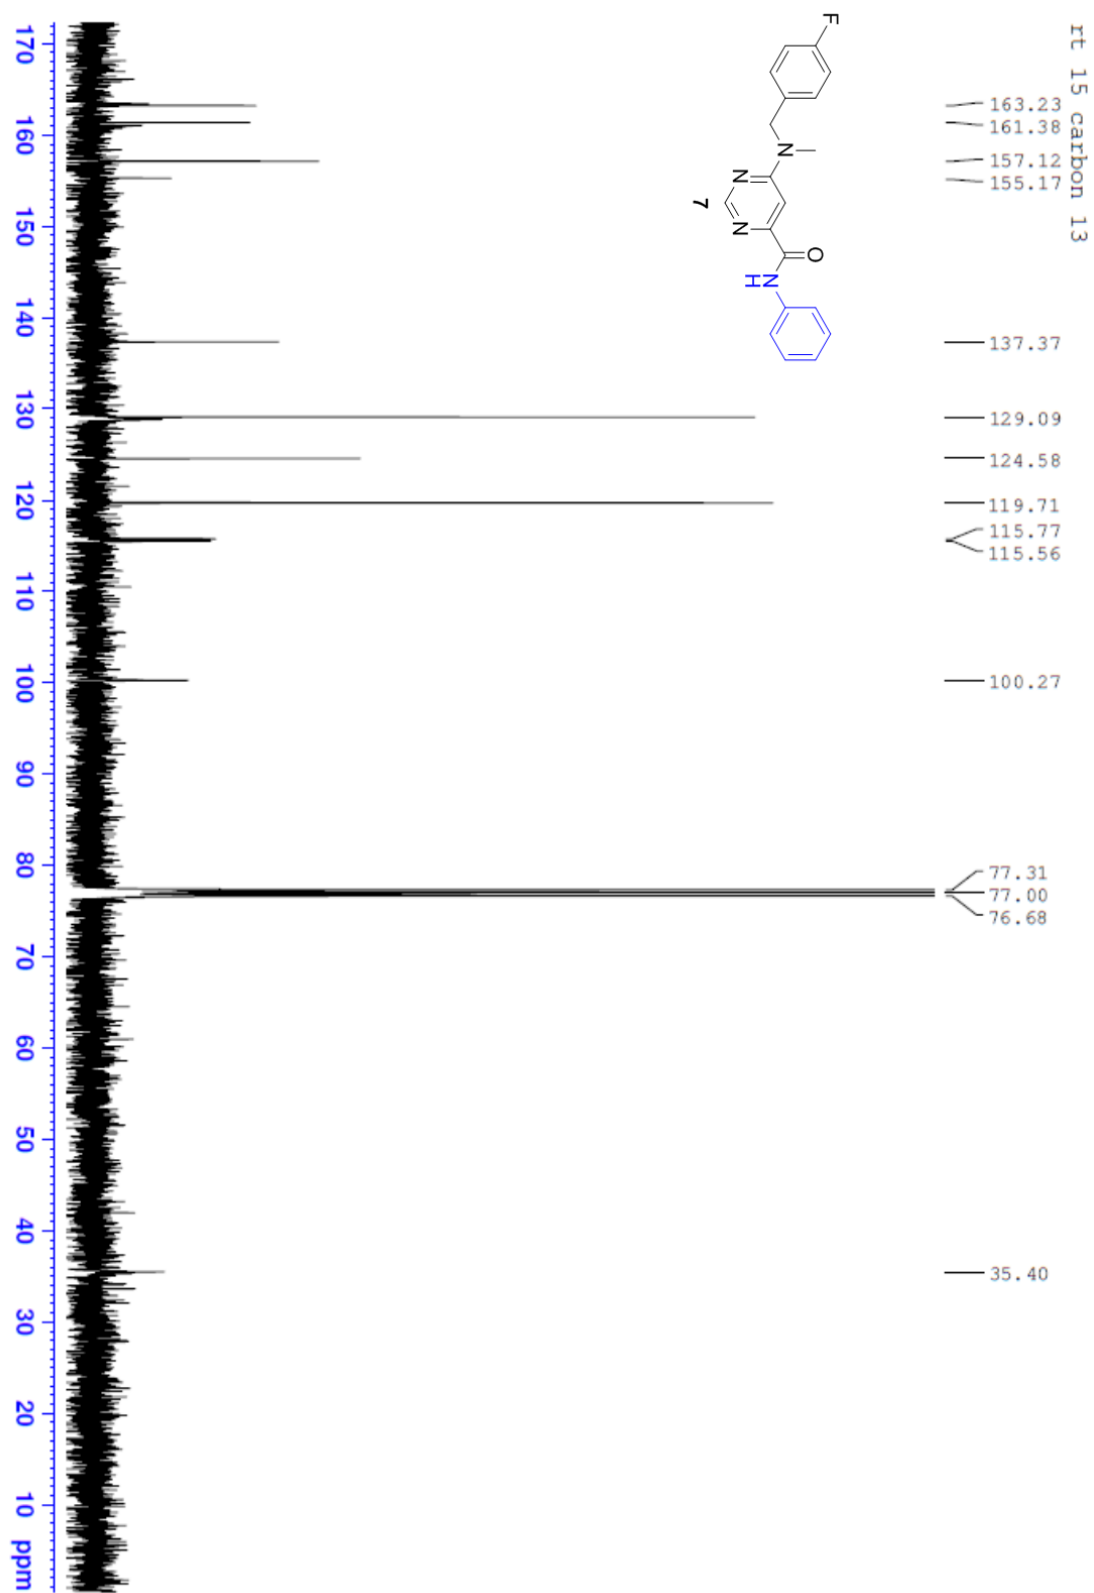

rt 15 4F

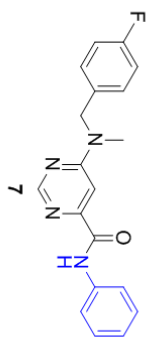

7

-114.85

Current Data Parameters  
NAME RT 15 4F  
EXPNO 1  
PROCNO 1

F2 - Acquisition Parameters

Date\_ 20200206  
Time 9.12 h  
INSTRUM spect  
PROBHD Z108618.0217 (4  
PULPROG zgpg30  
TD 131072  
ID CD012  
SOLVENT CDCl3  
NS 256  
DS 4  
SWH 83285.711 Hz  
FIDRES 1.362362 Hz  
AQ 0.7340032 sec  
RG 575  
DE 5.600 usec  
TE 299.0 K  
D1 1.00000000 sec  
D11 0.03000000 sec  
D12 0.0002000 sec  
TD0 1  
SF01 376.4983502 MHz  
NUC1 19F  
P1 11.75 usec  
PL1 0.00 dB  
SFO2 400.1716007 MHz  
NUC2 1H  
CPRPG12 waltz16  
PCPD2 90.00 usec  
P1W2 23.05500031 W  
P1W12 0.40987000 W

F2 - Processing parameters

SI 65536  
SF 376.5360040 MHz  
WDW EM  
SSB 0  
LB 0.30 Hz  
GB 0  
PC 1.00

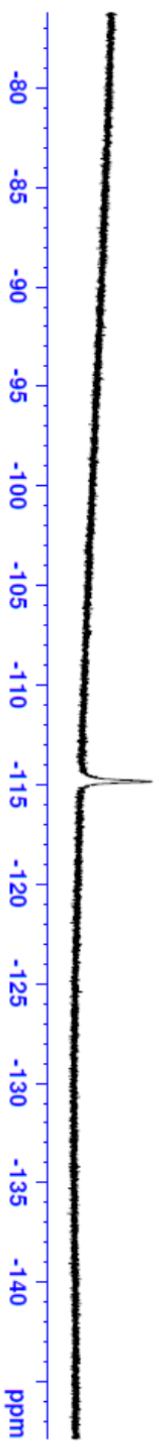

Supplement: Supplementary file 1 [file molecules-25-01040-s001.pdf]
